# Supplementary material for: Synthesis of 1,4-imino-L-lyxitols modified at C-5 and their evaluation as inhibitors of GH38 α-mannosidases
Source: PubMed Central journal article supplement (PMC6122390; doi:10.3762/bjoc.14.189), 2018-08-17

# Supporting Information

for

## Synthesis of 1,4-imino-L-lyxitols modified at C-5 and their evaluation as inhibitors of GH38 $\alpha$ -mannosidases

Maroš Bella<sup>1</sup>, Sergej Šesták<sup>1</sup>, Ján Moncol<sup>2</sup>, Miroslav Koóš<sup>1</sup> and Monika Poláková\*<sup>1</sup>

Address: <sup>1</sup>Department of Glycochemistry, Institute of Chemistry, Slovak Academy of Sciences Dúbravská cesta 9, SK-845 38, Bratislava, Slovakia and <sup>2</sup>Department of Inorganic Chemistry, Faculty of Chemical and Food Technology, Radlinského 9, SK-812 37 Bratislava, Slovakia

Email: Monika Poláková - chemonca@savba.sk

\*Corresponding author

**Copies of <sup>1</sup>H and <sup>13</sup>C NMR spectra of all prepared compounds**

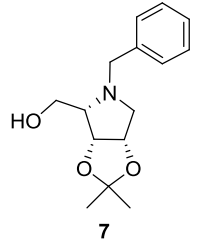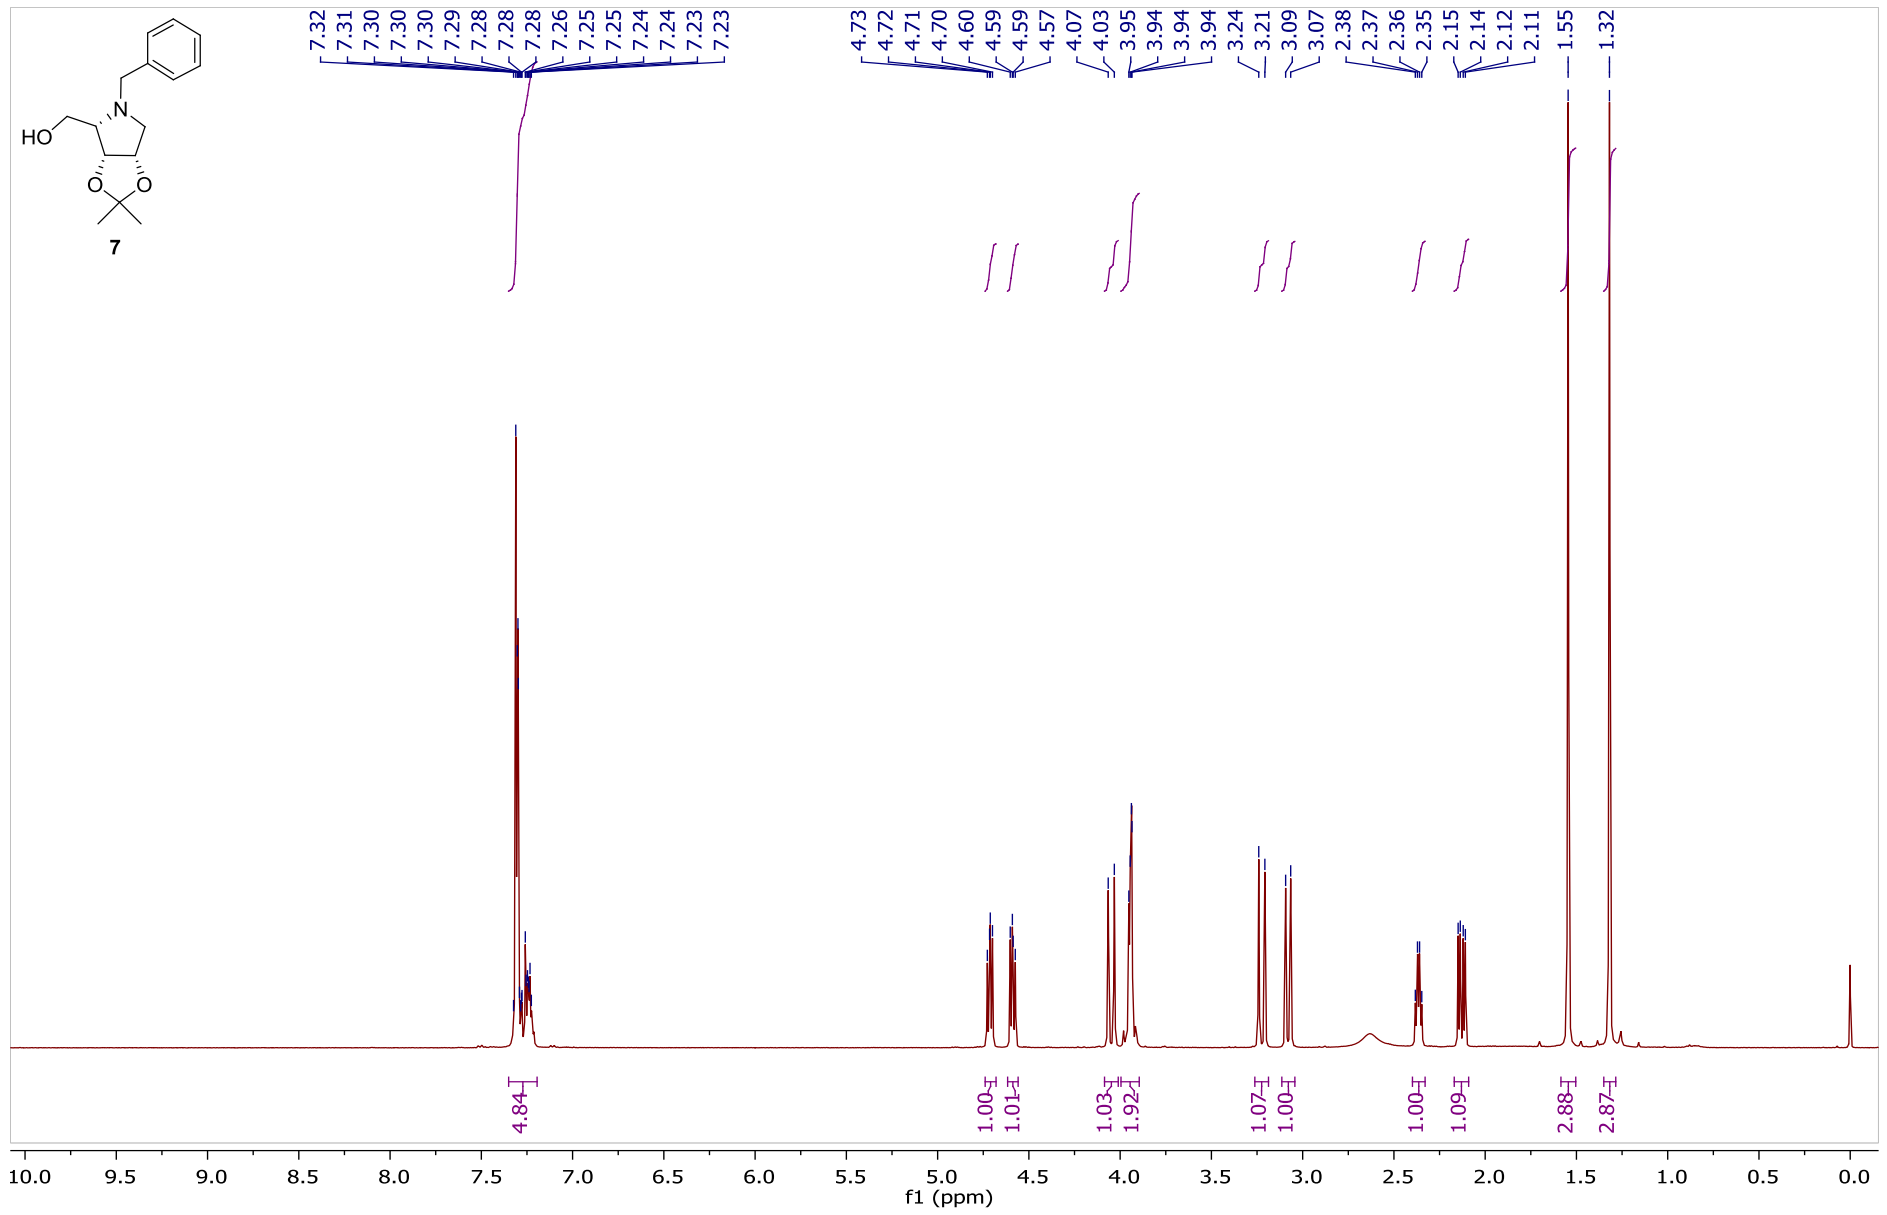

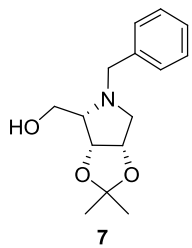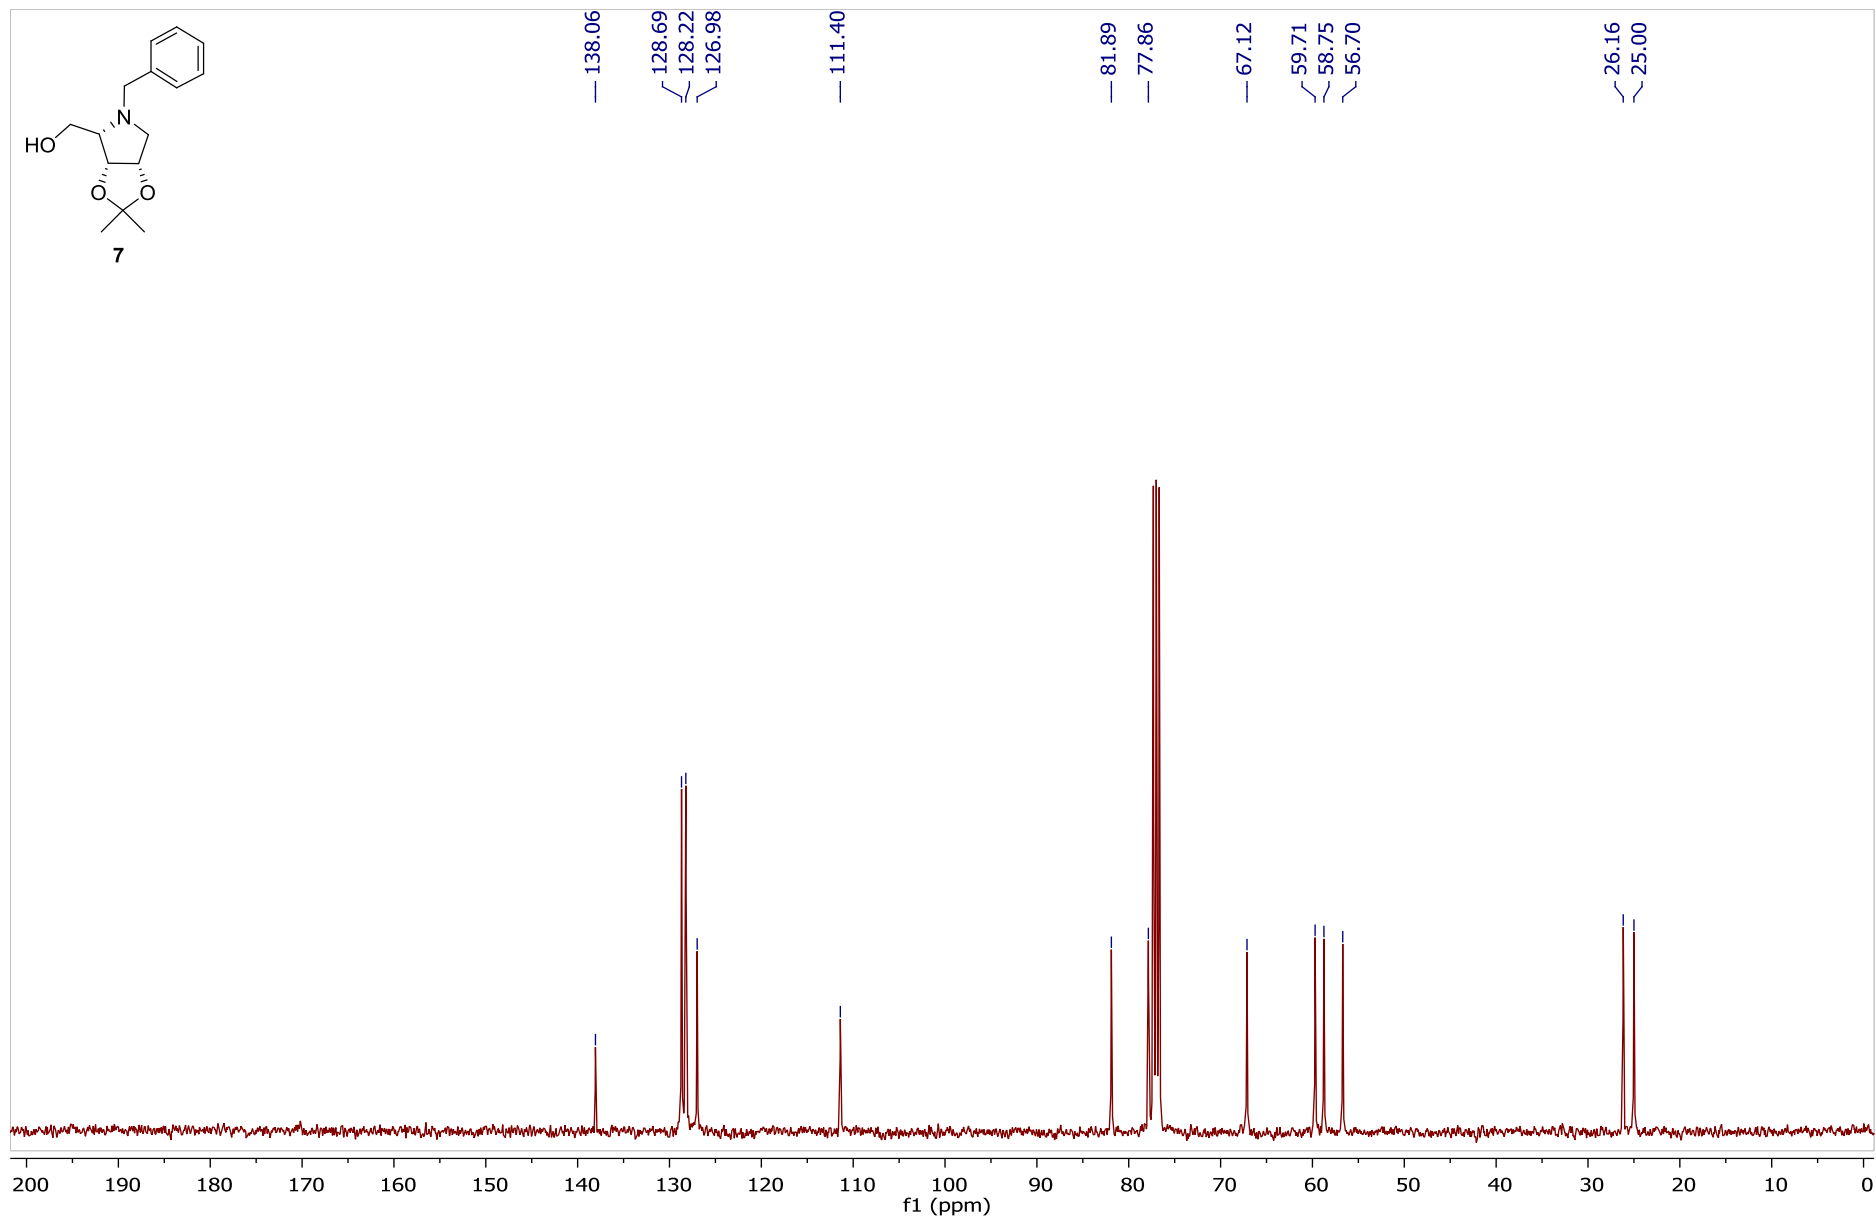

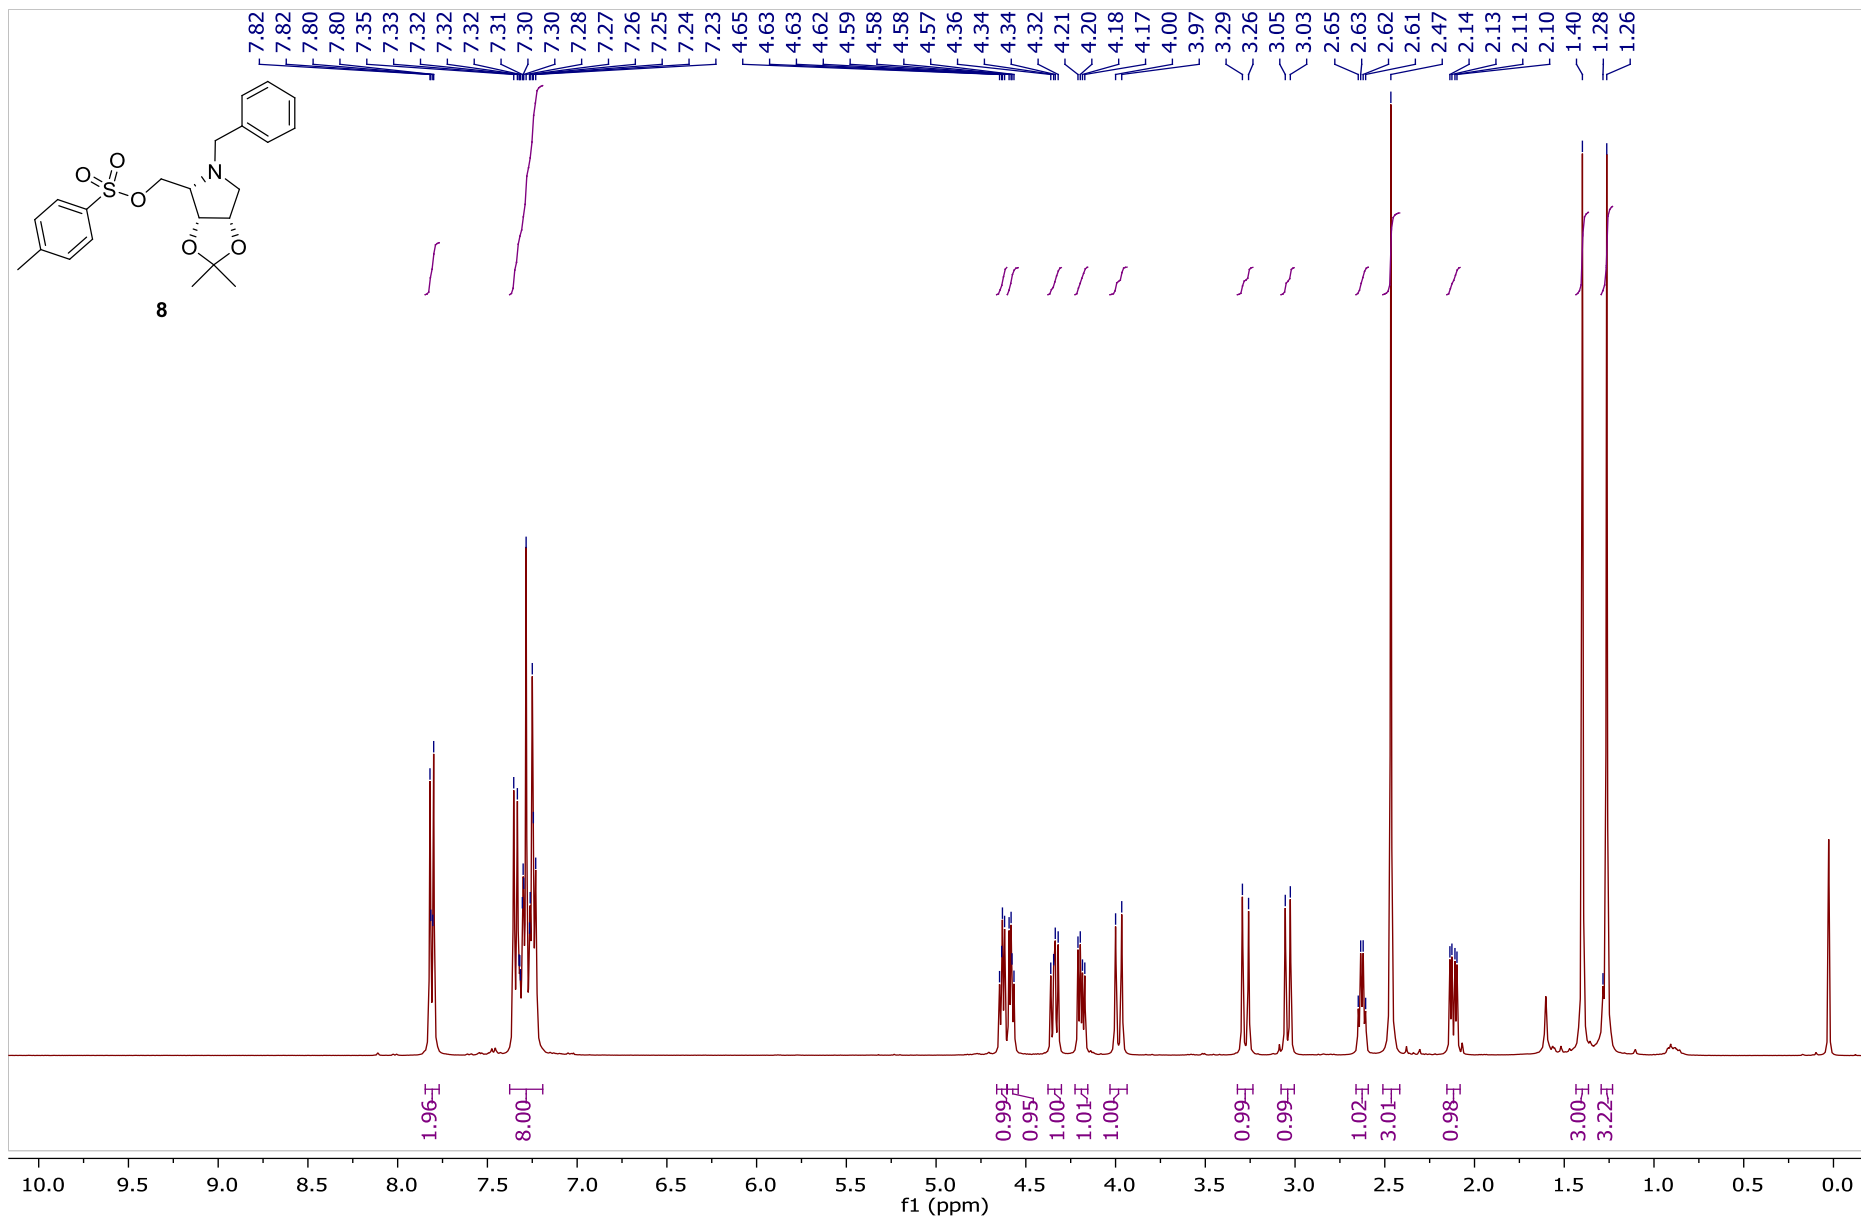

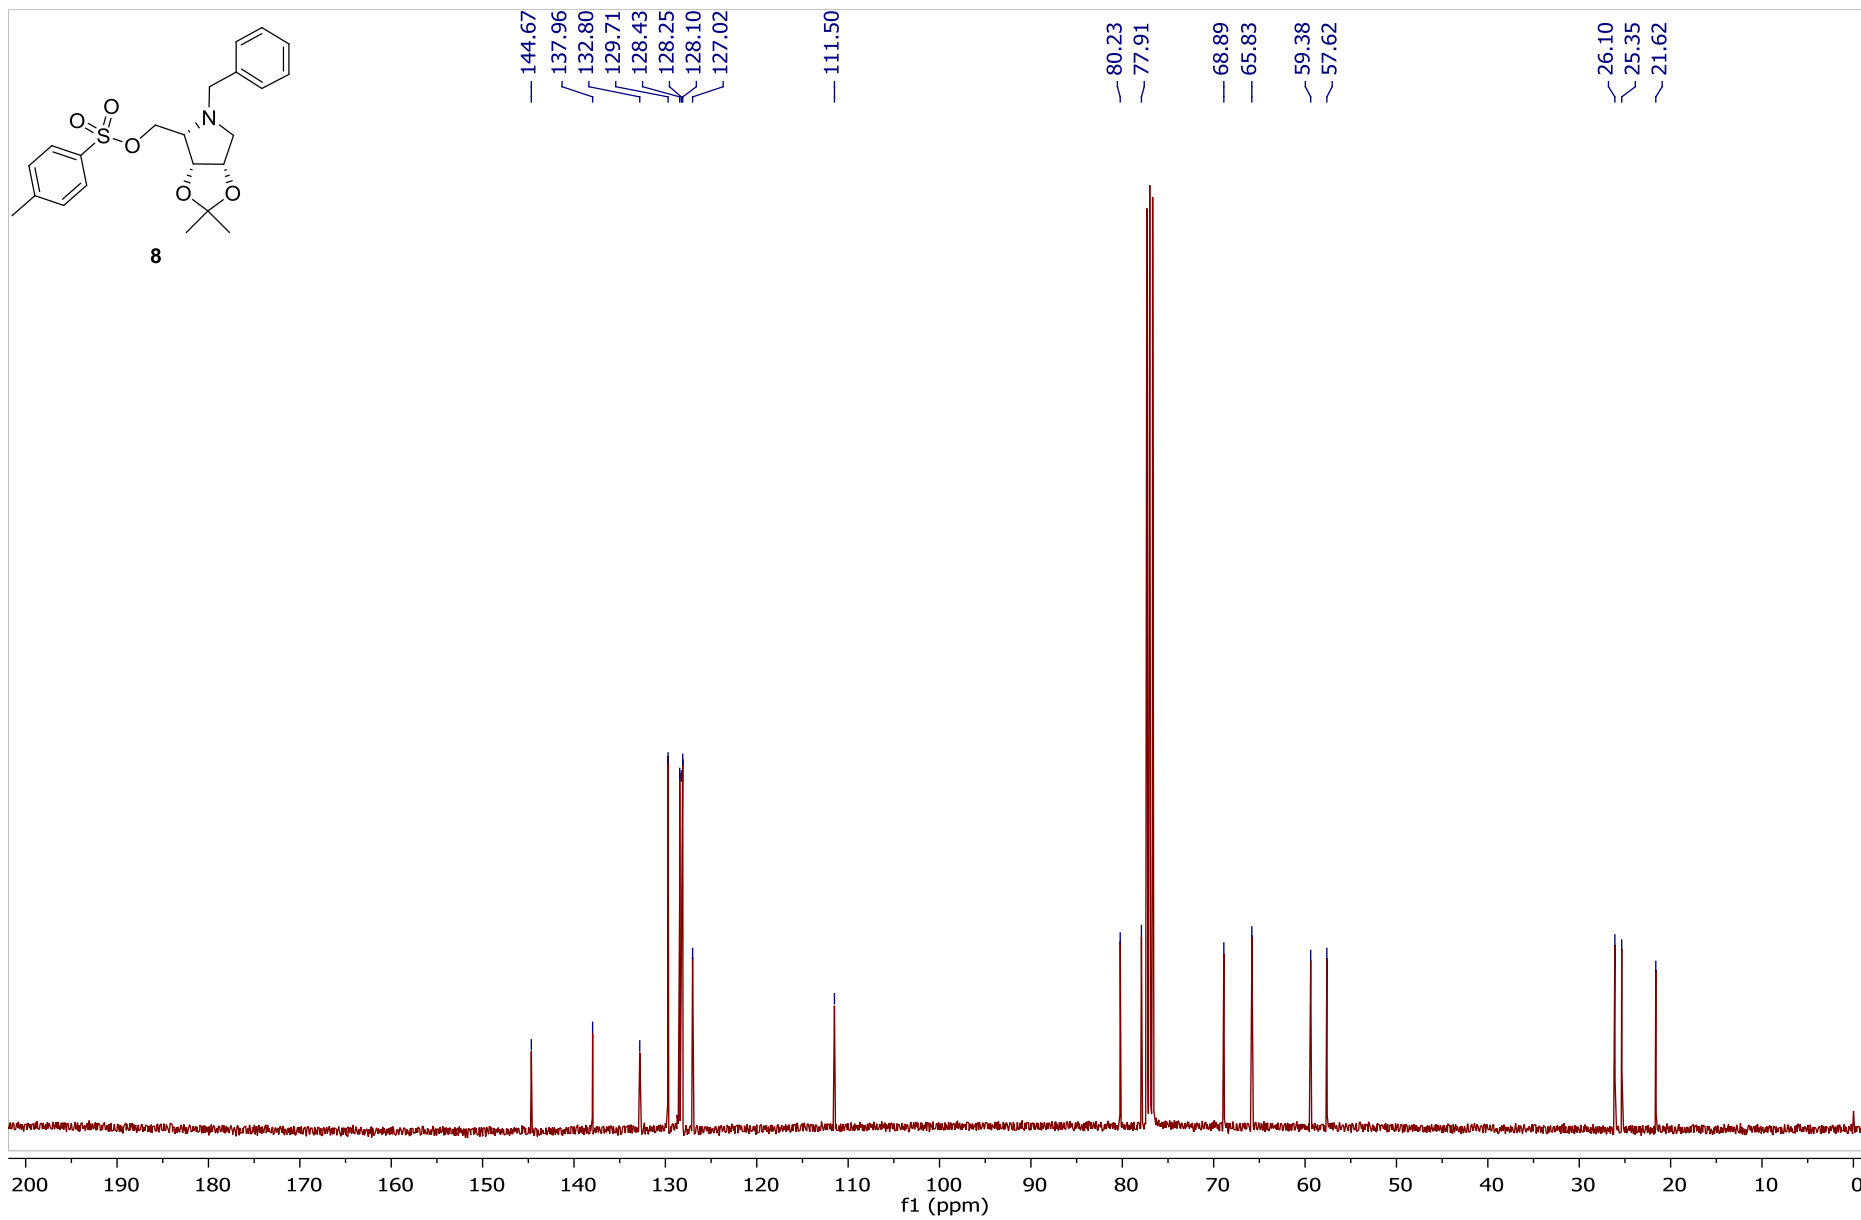

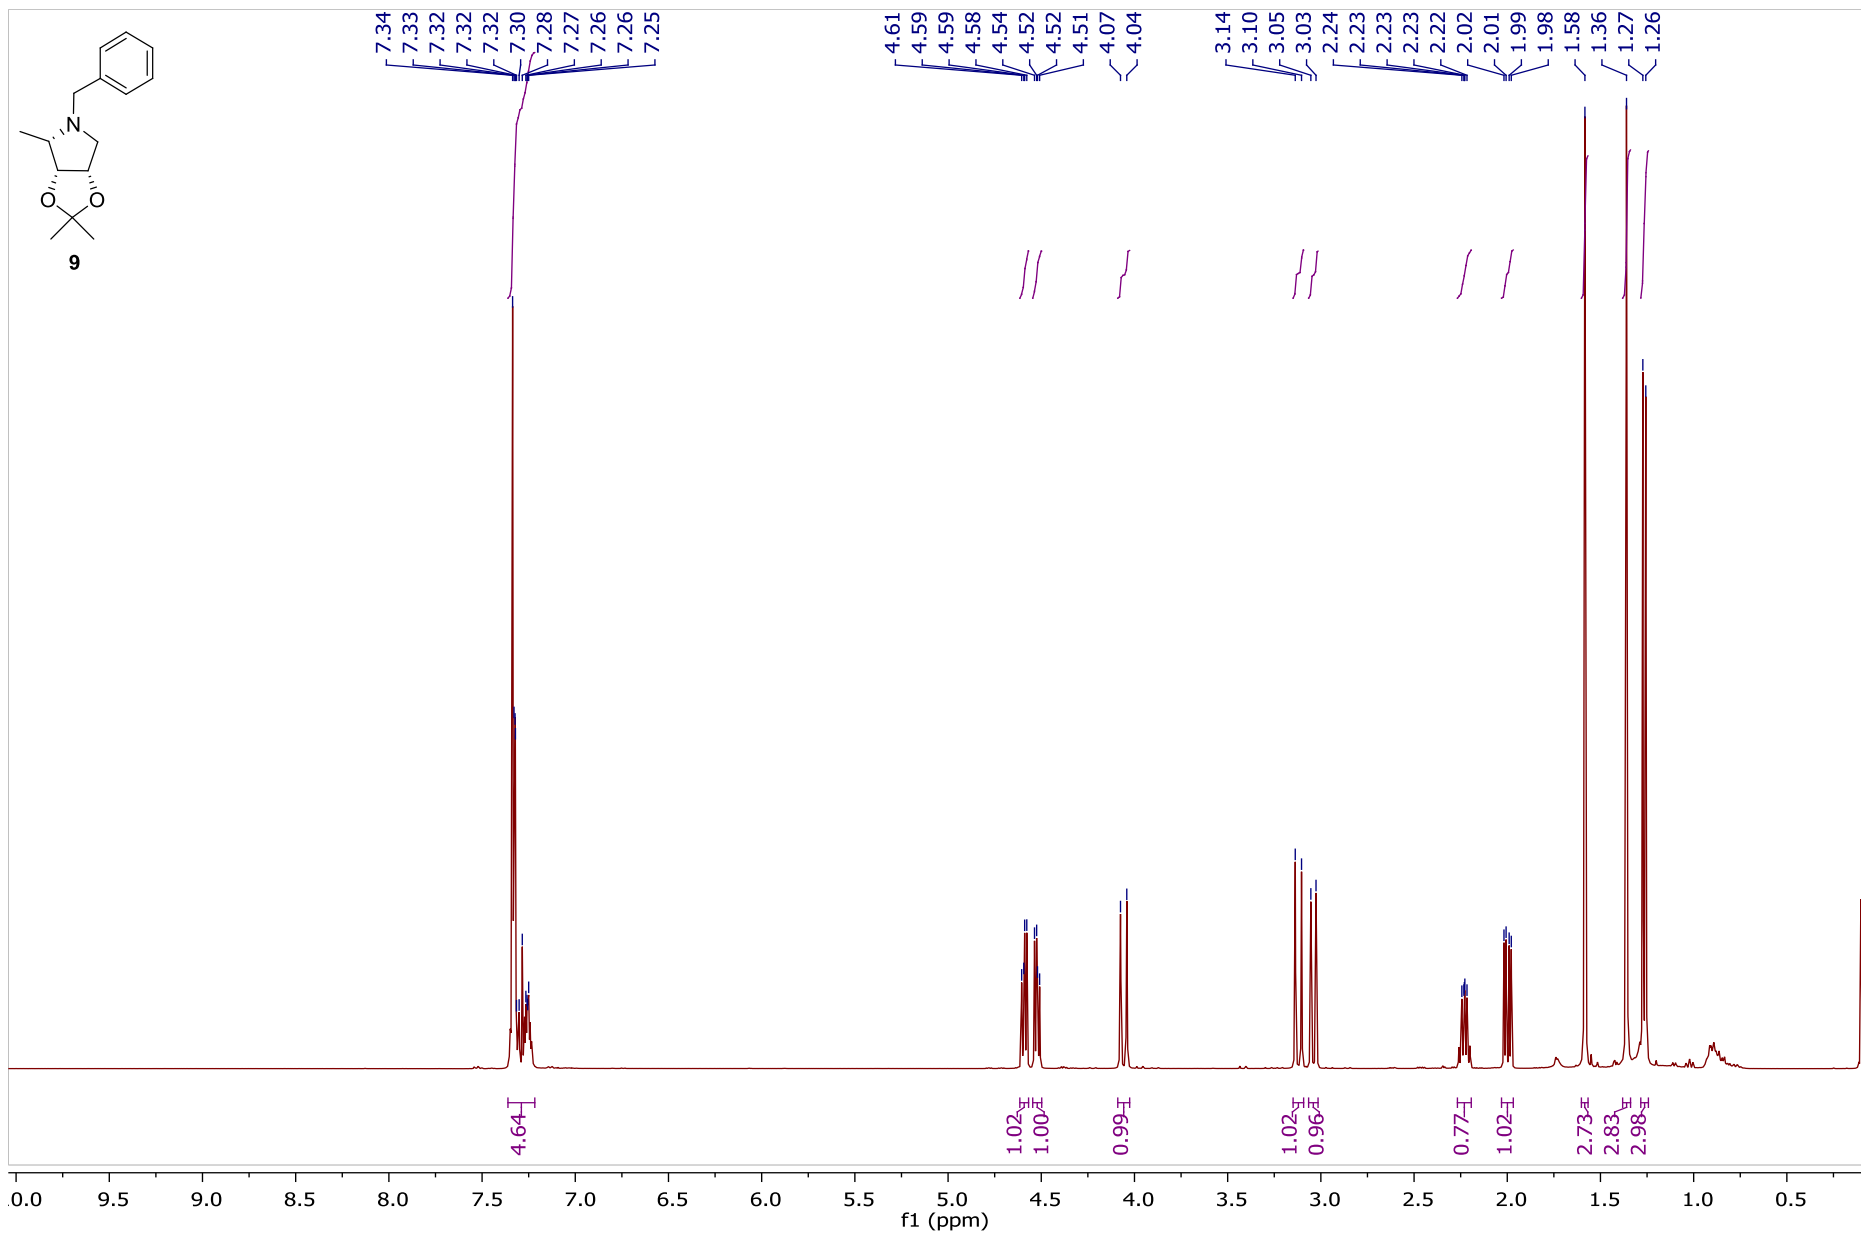

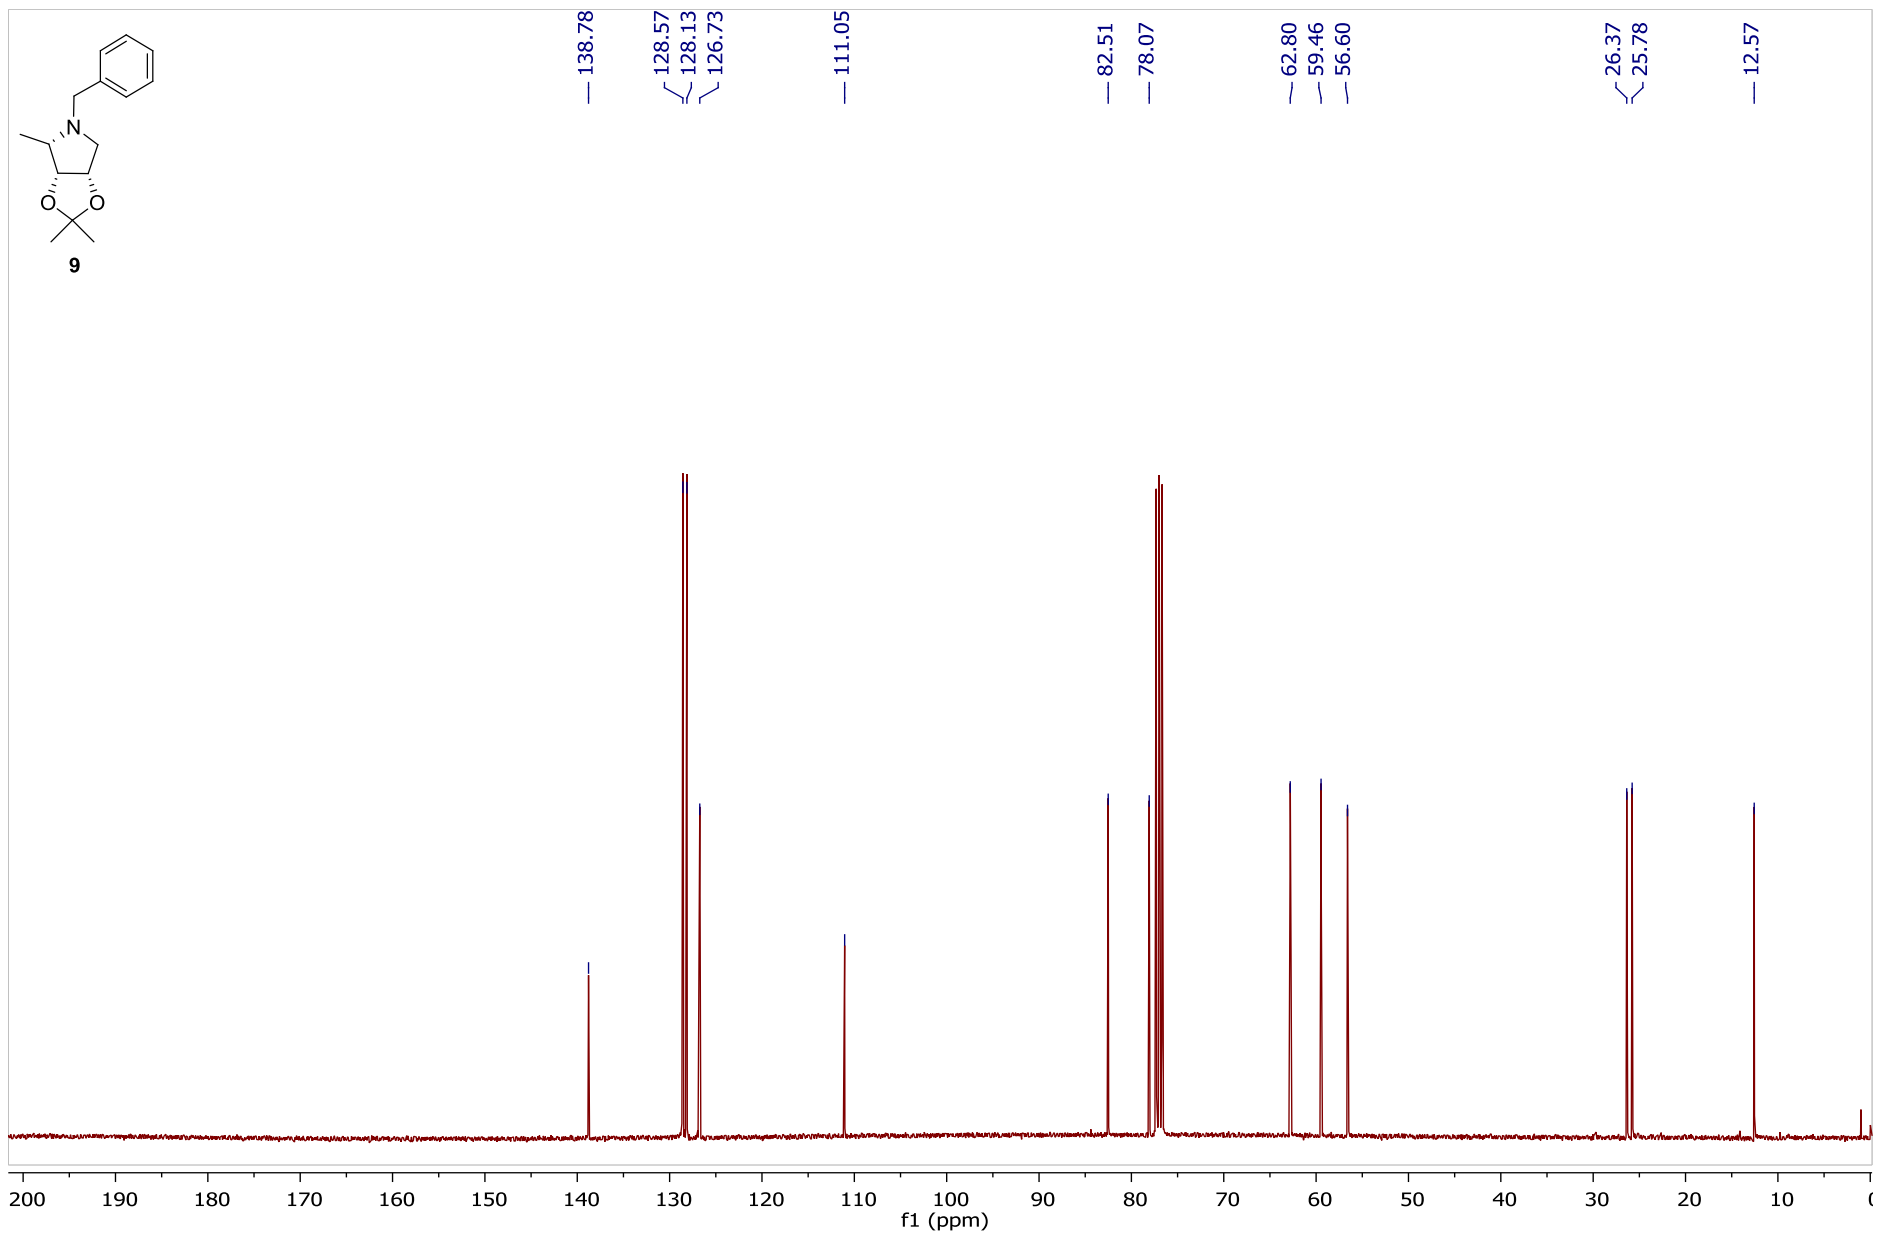

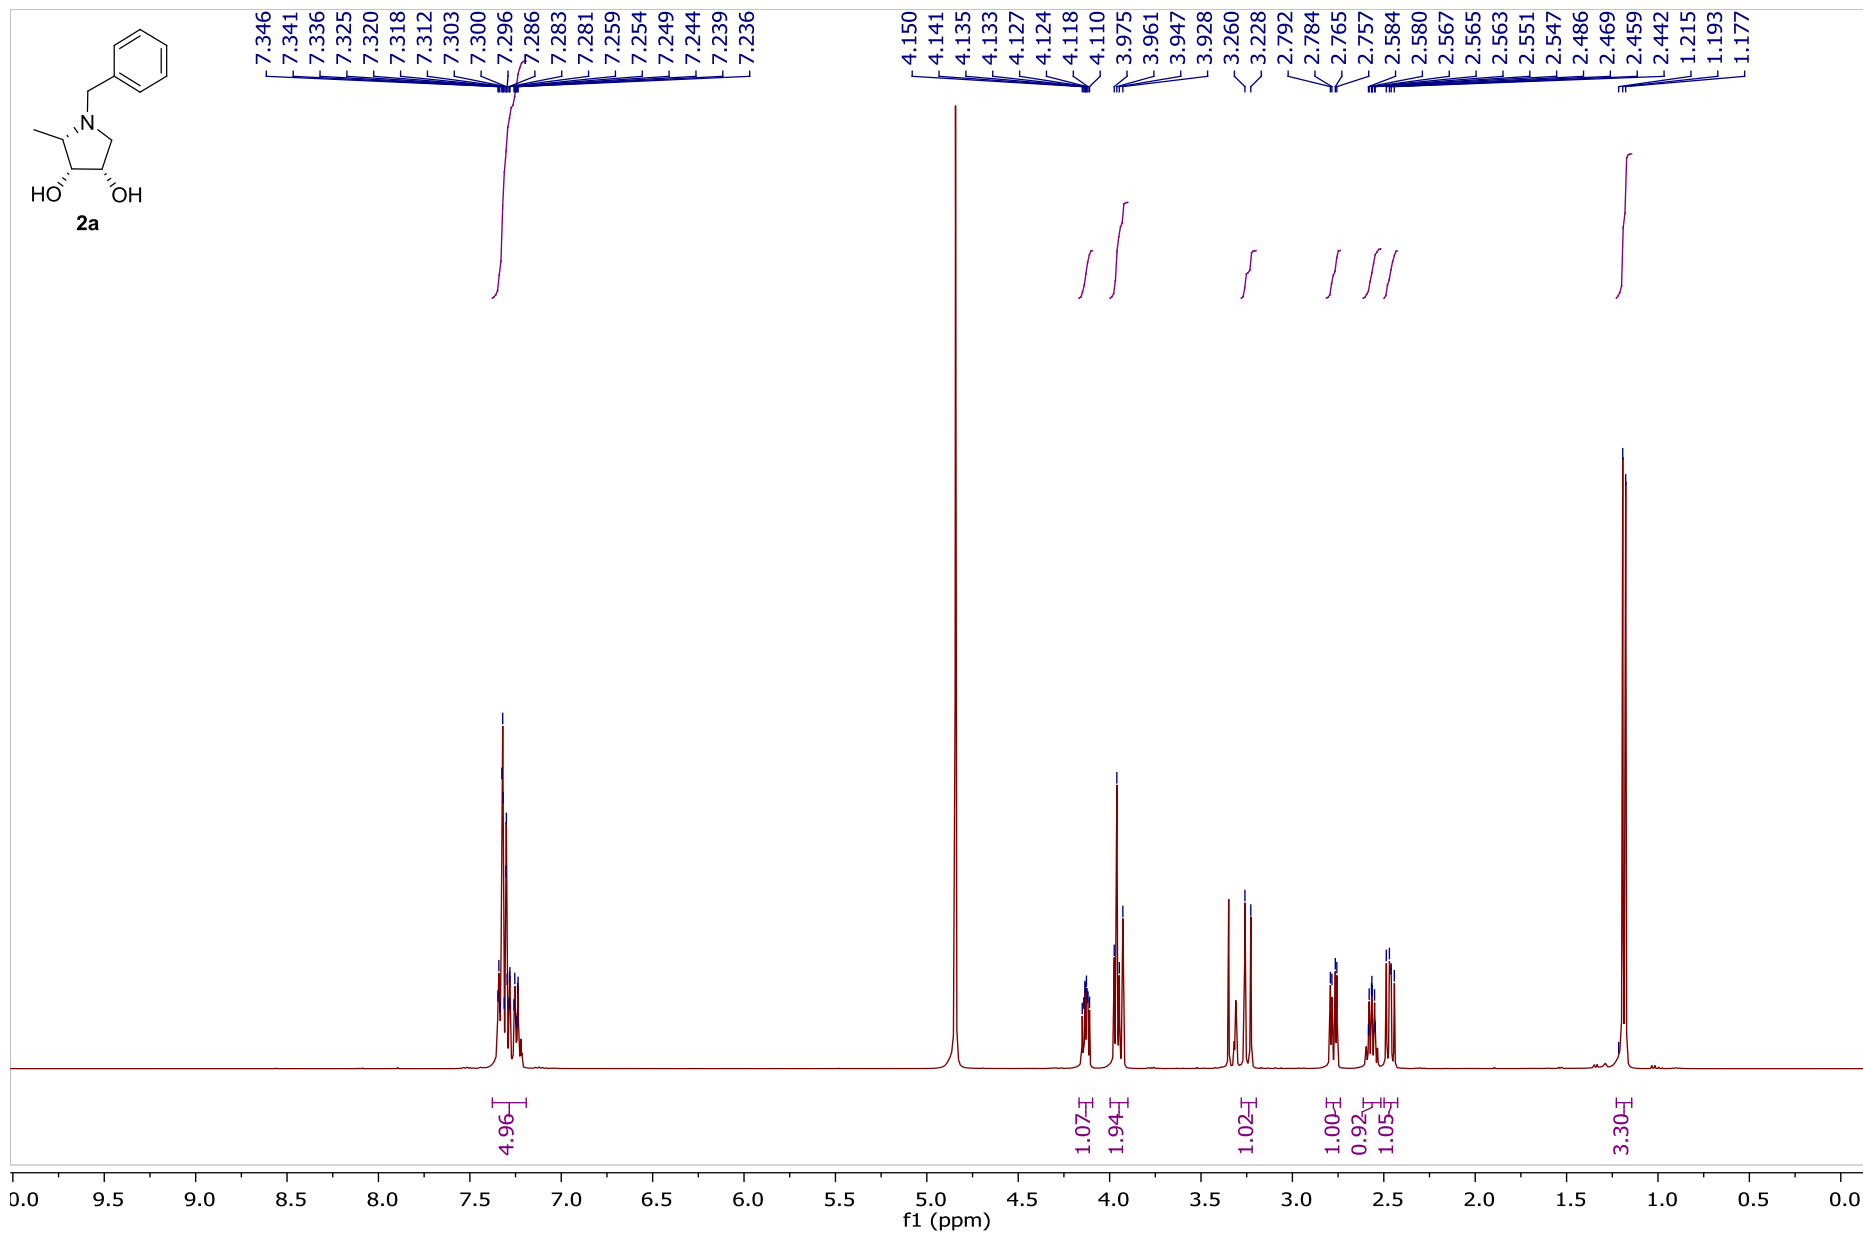



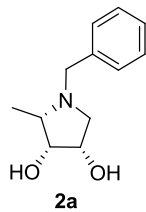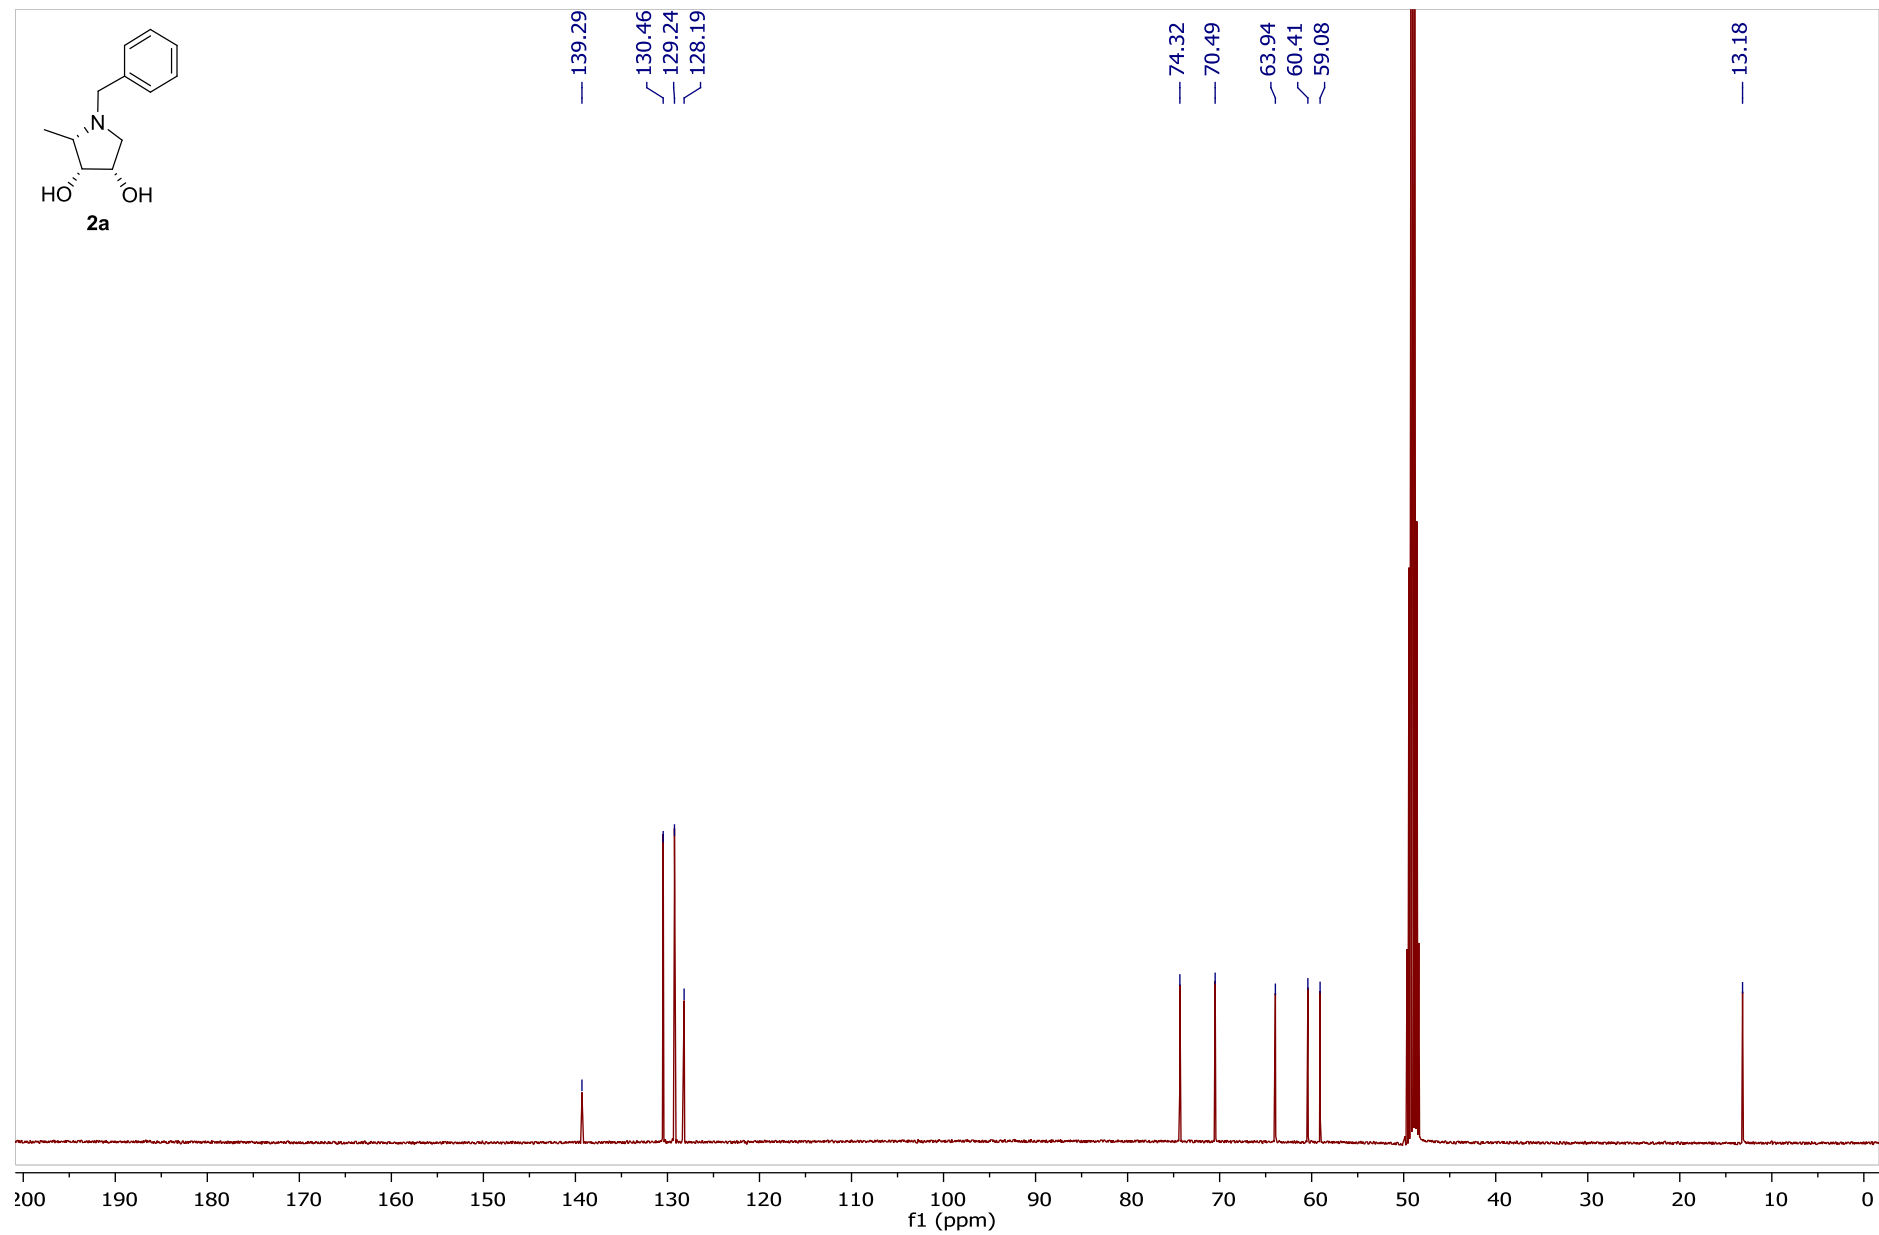

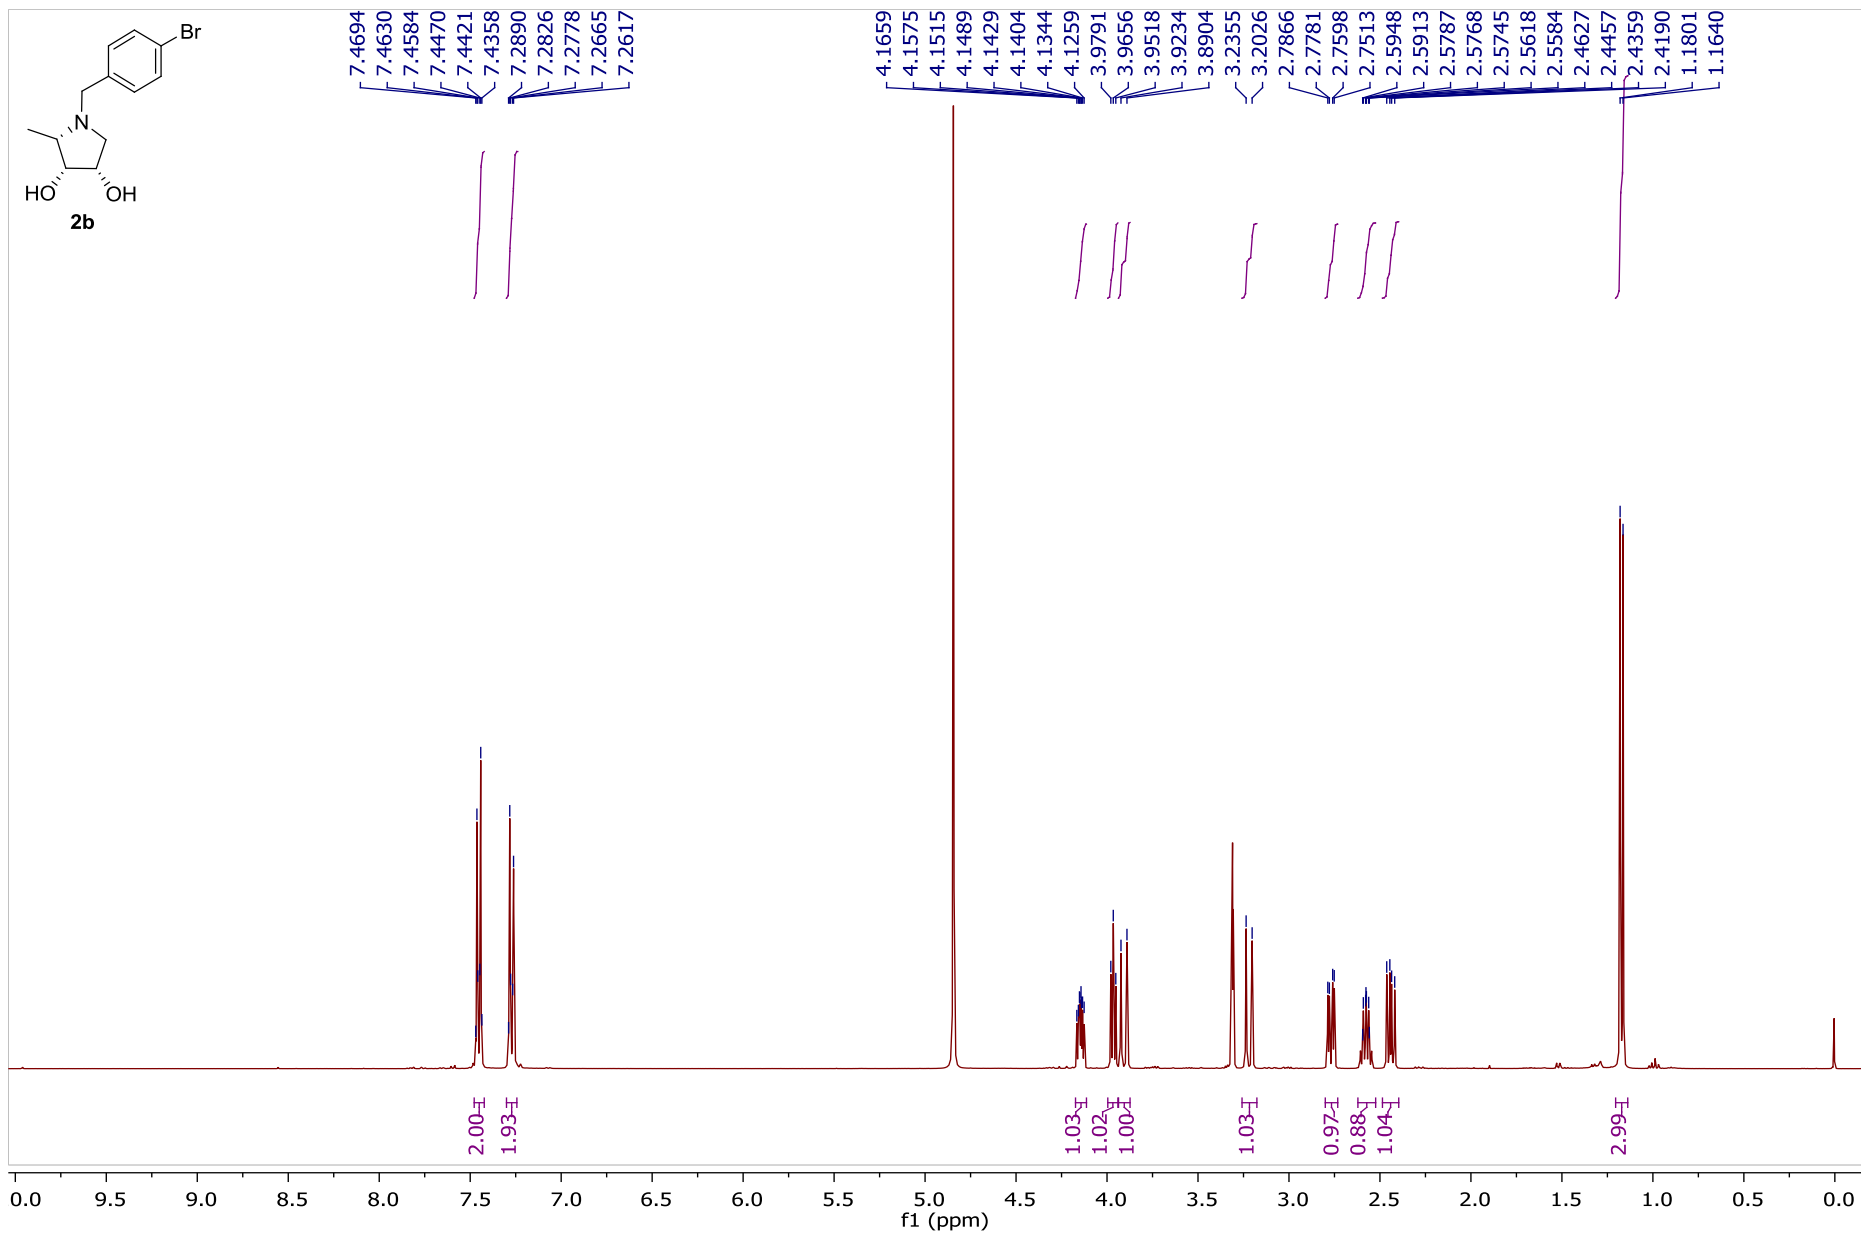

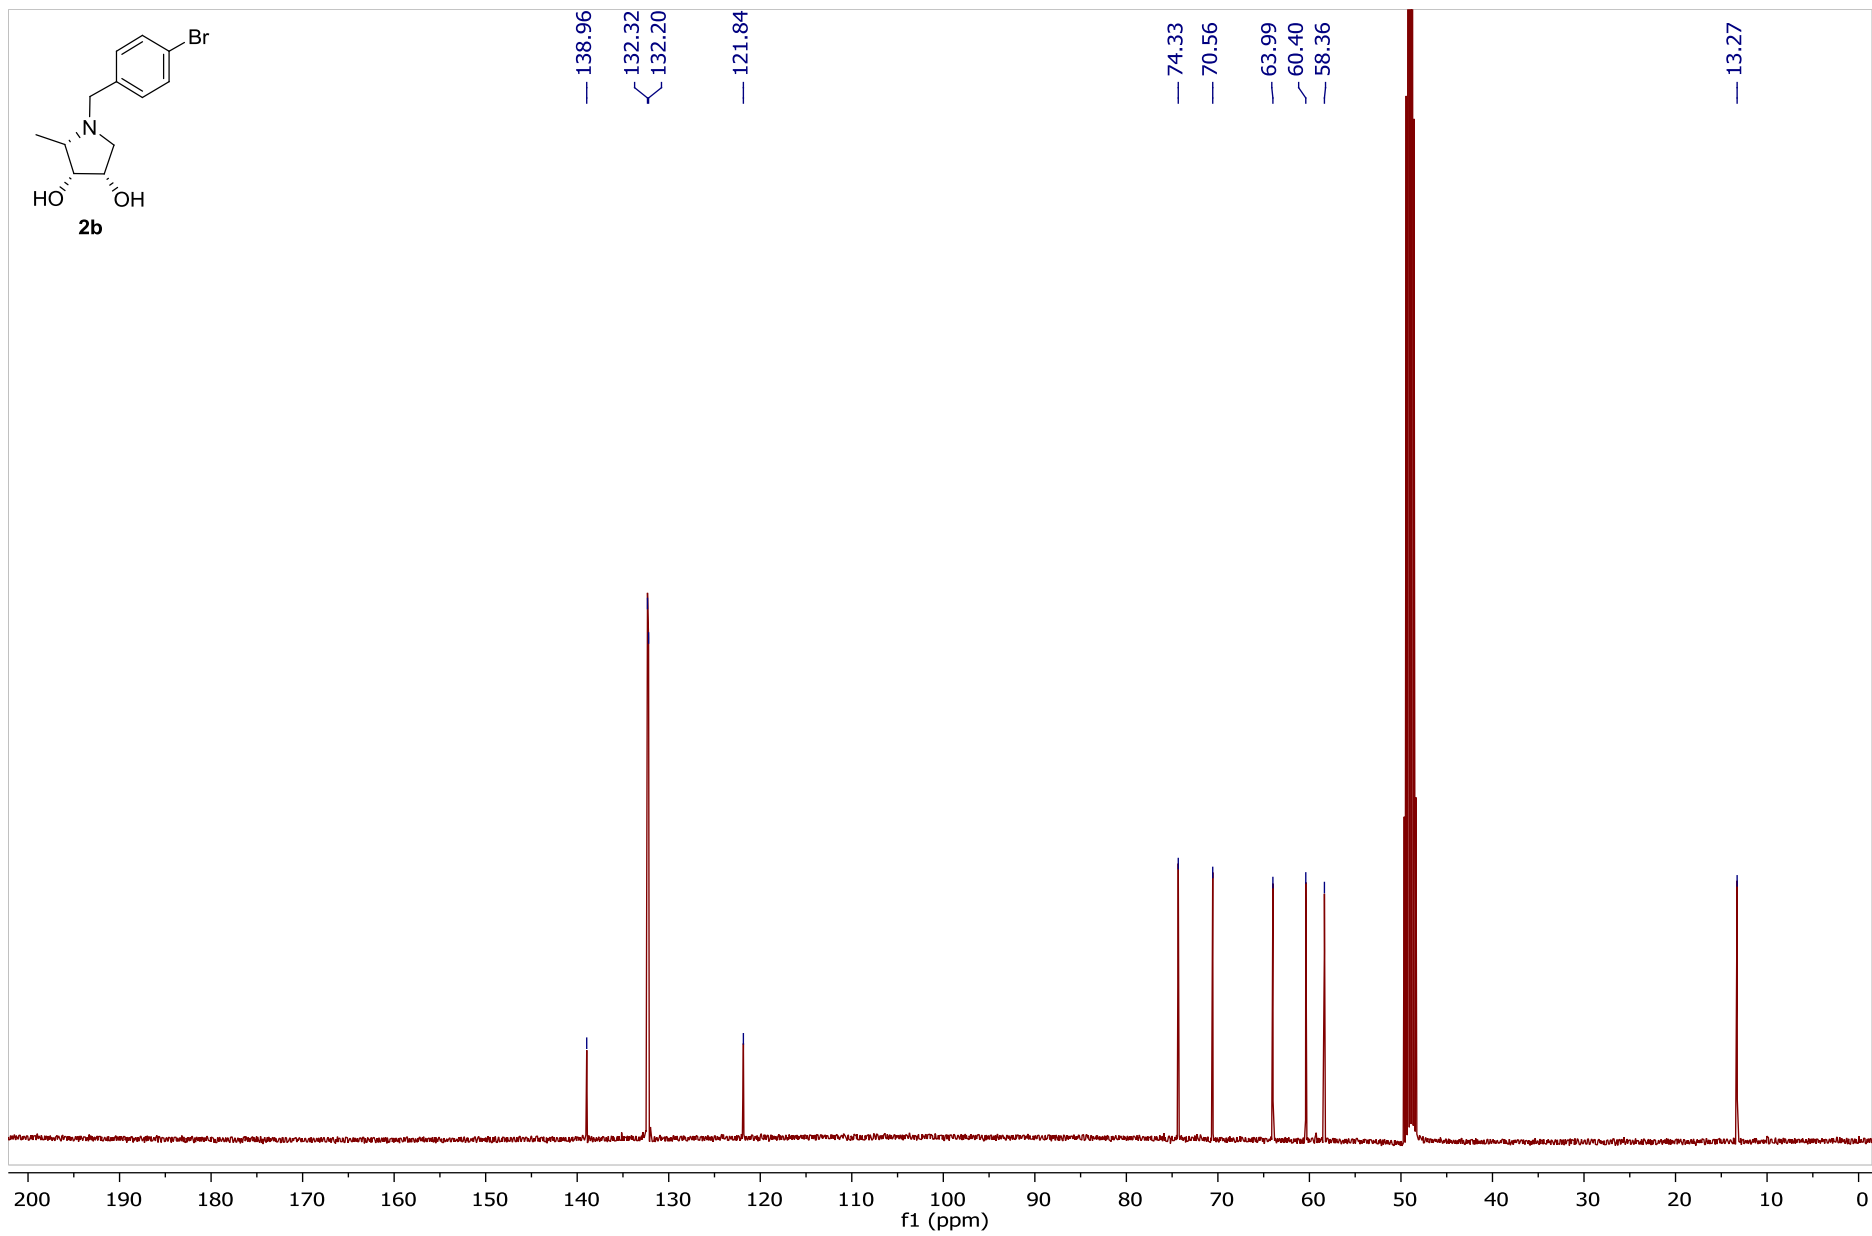

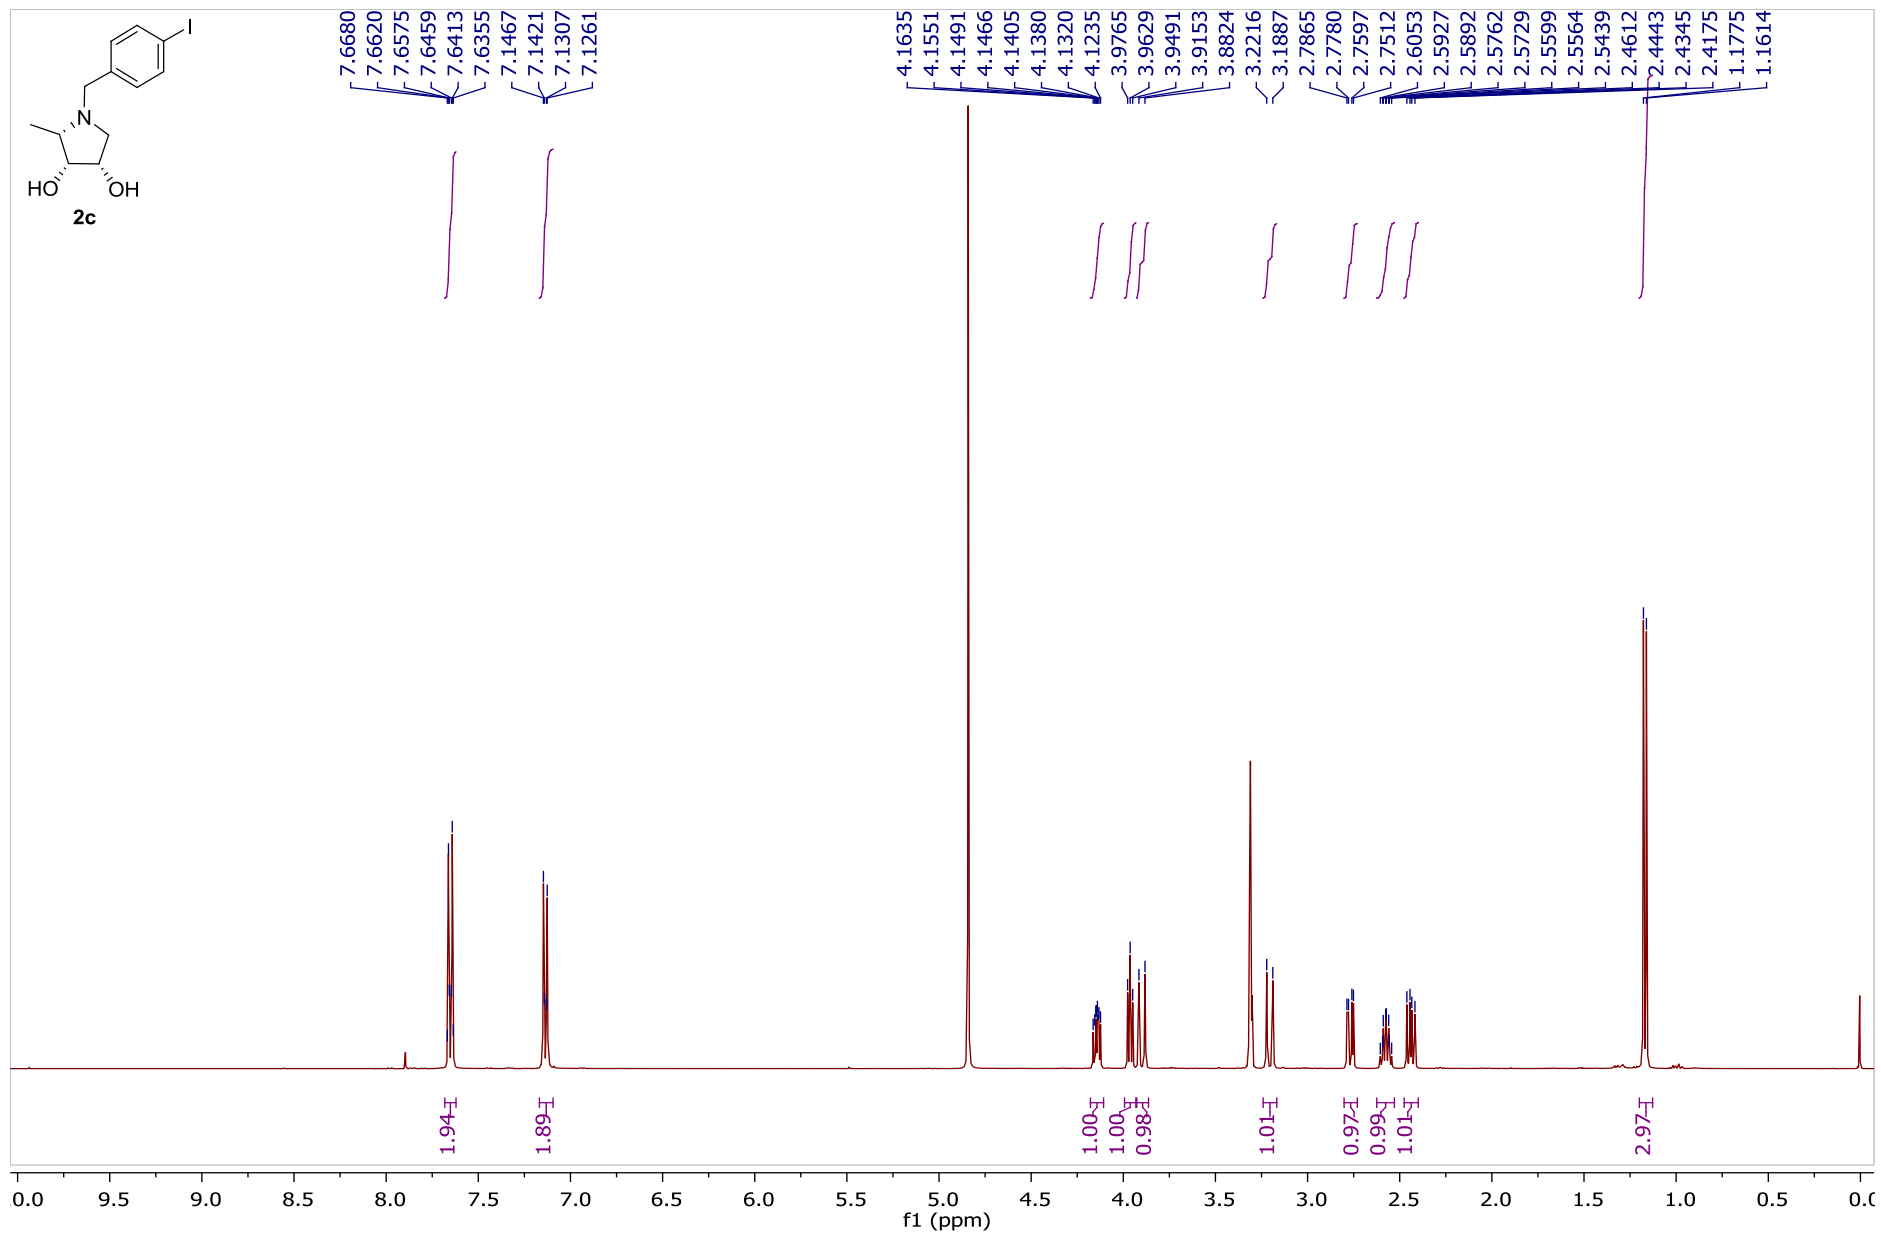

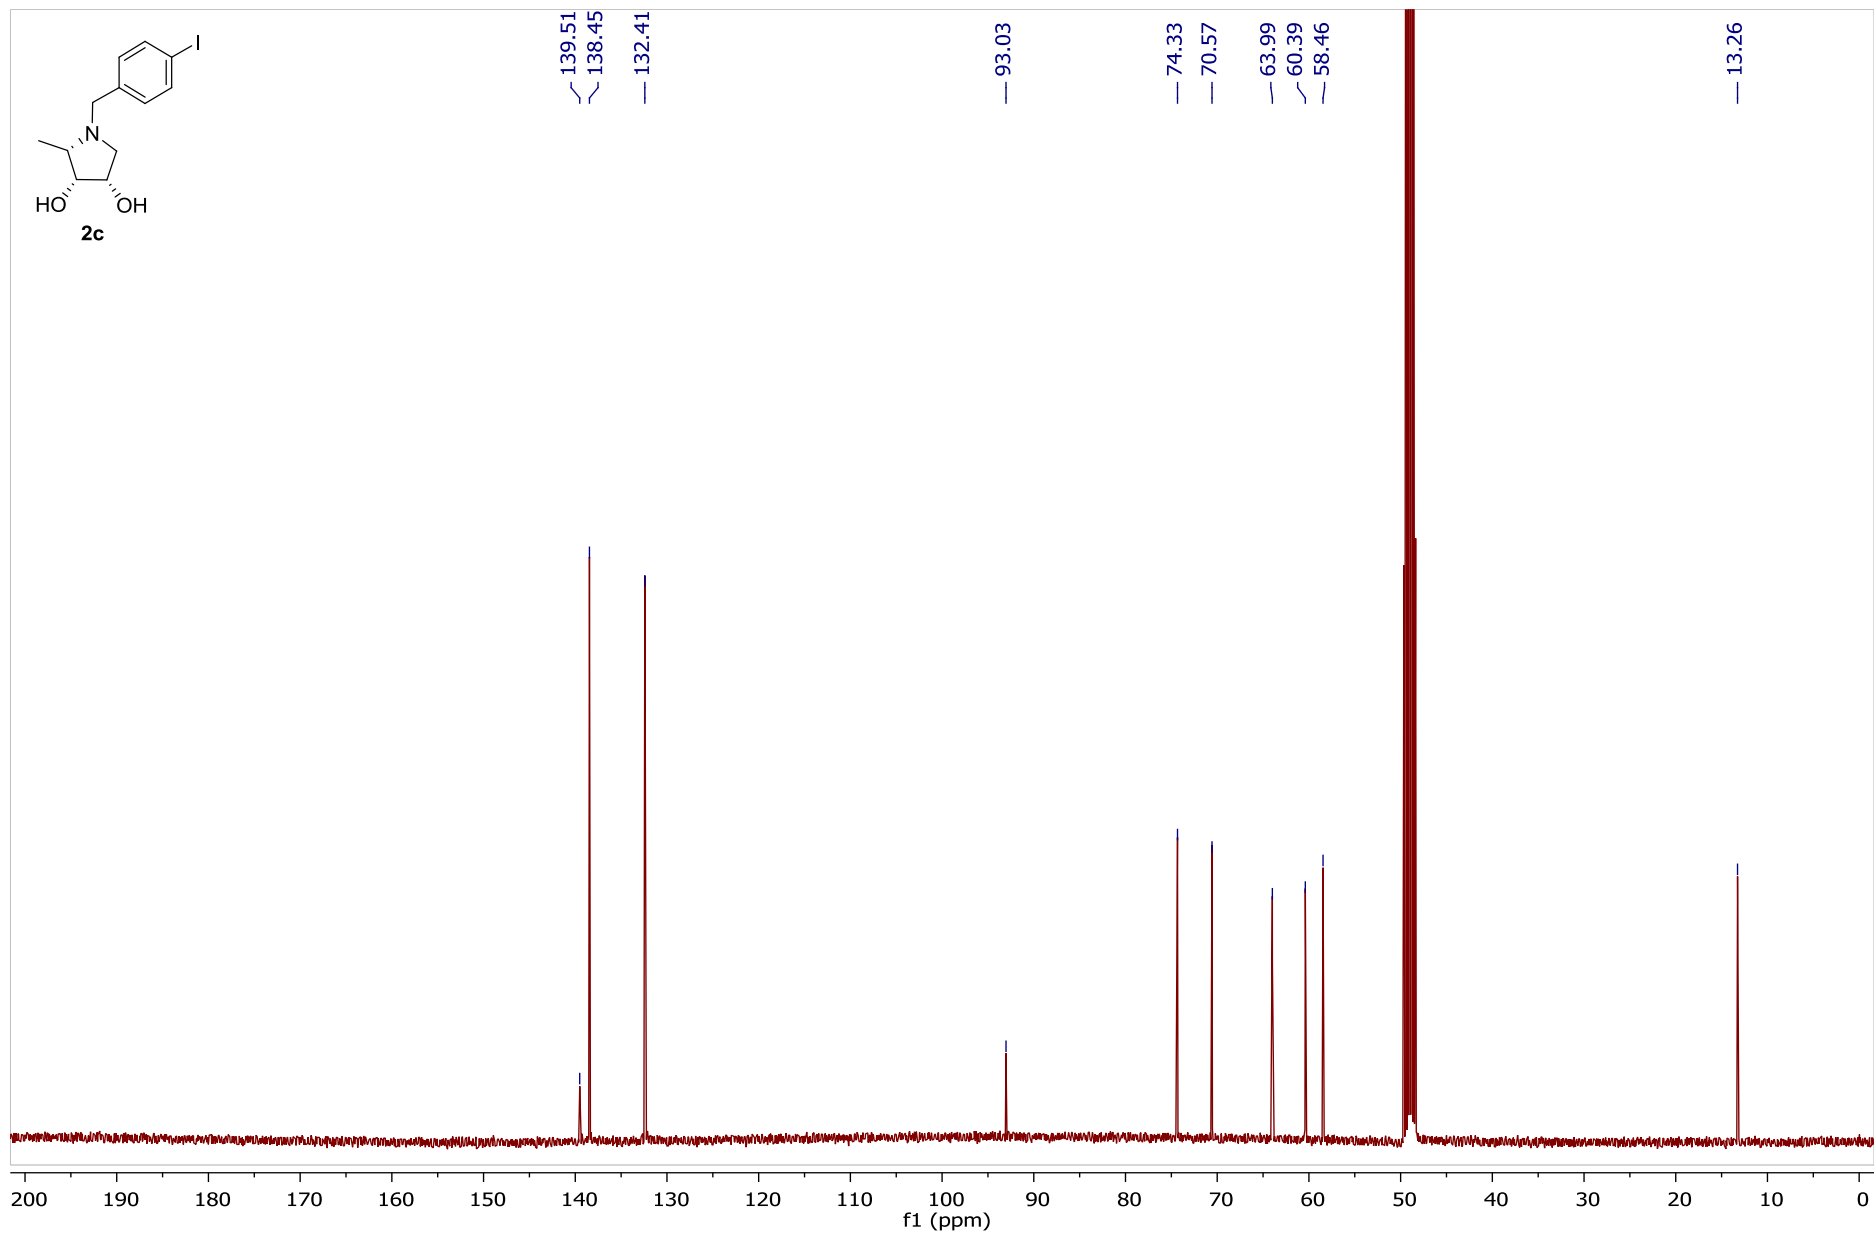

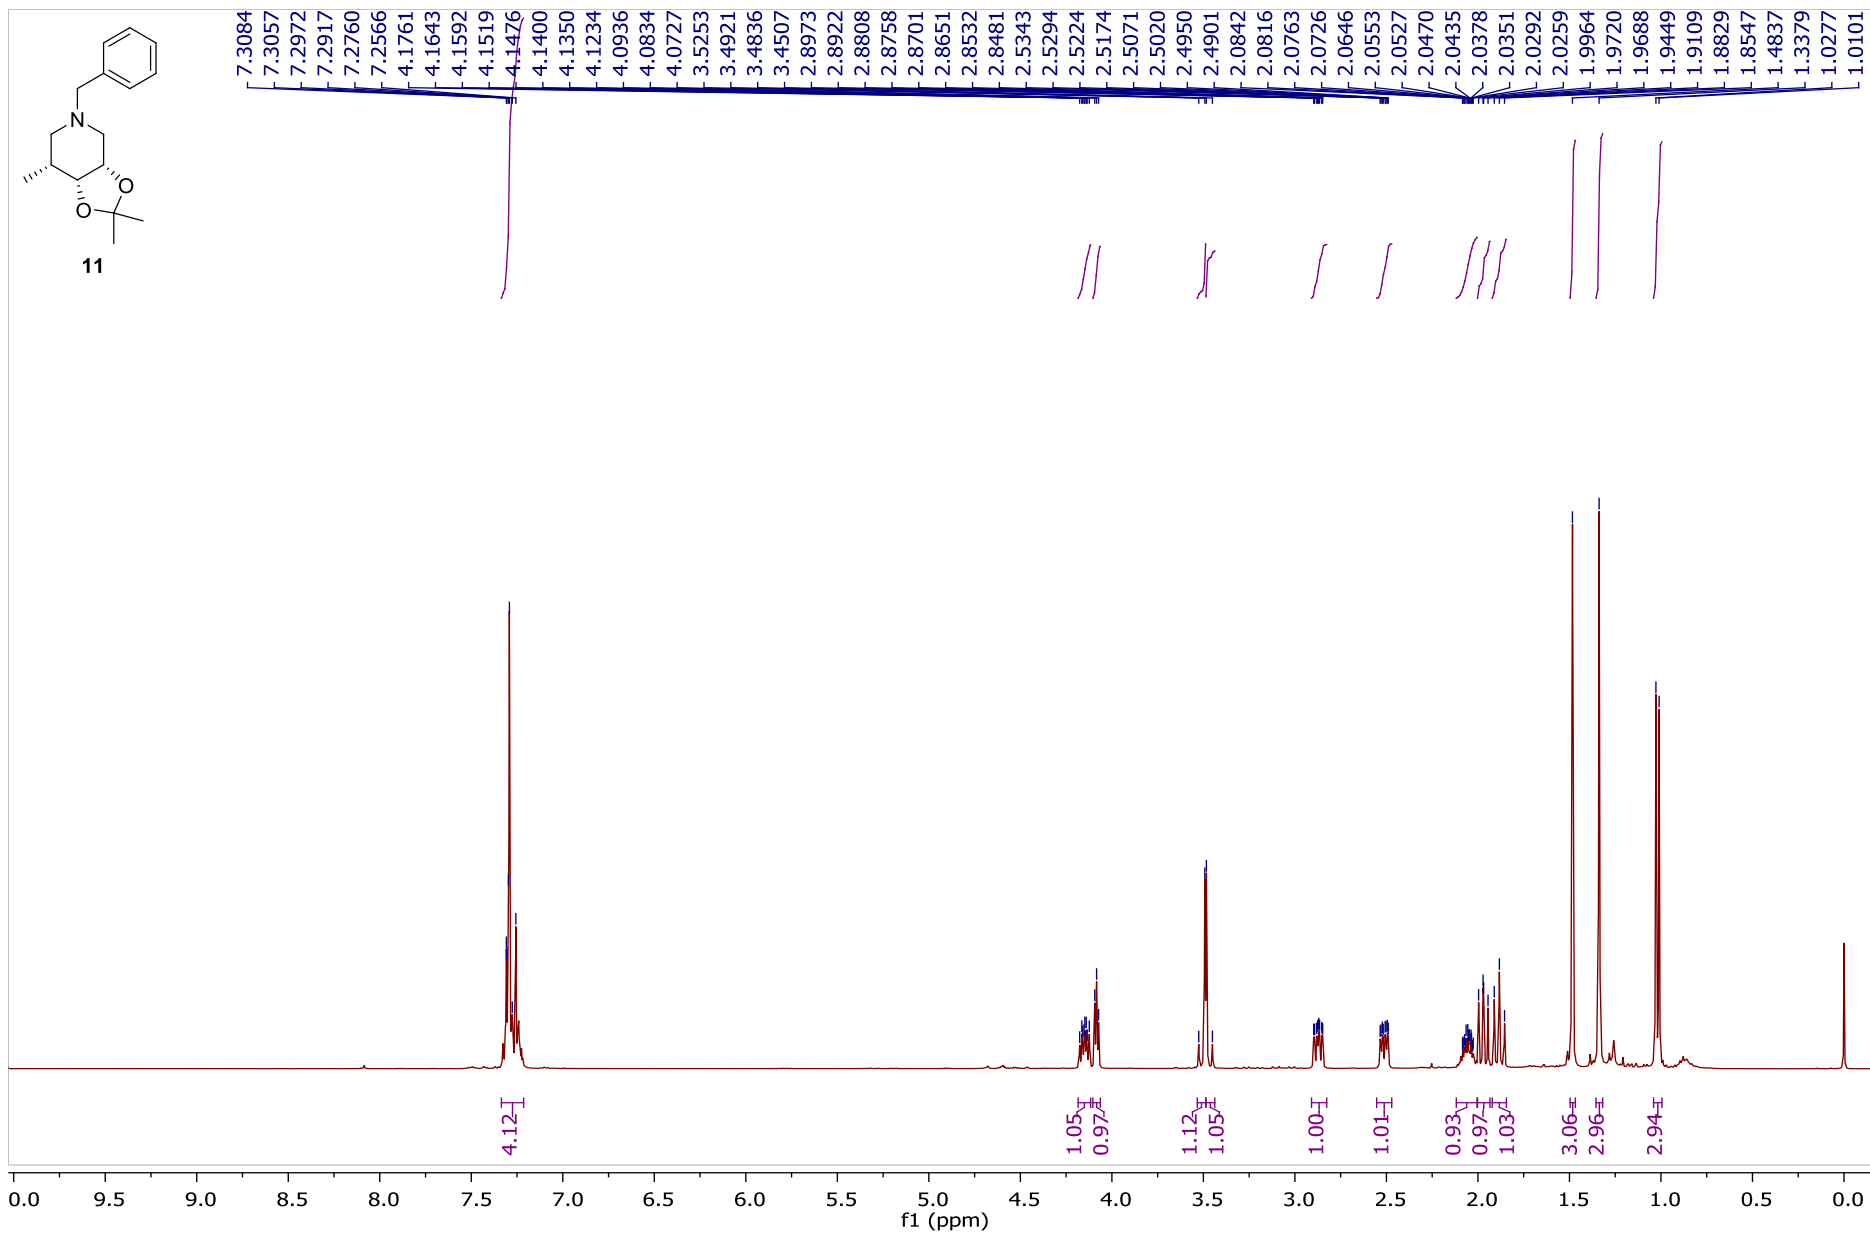

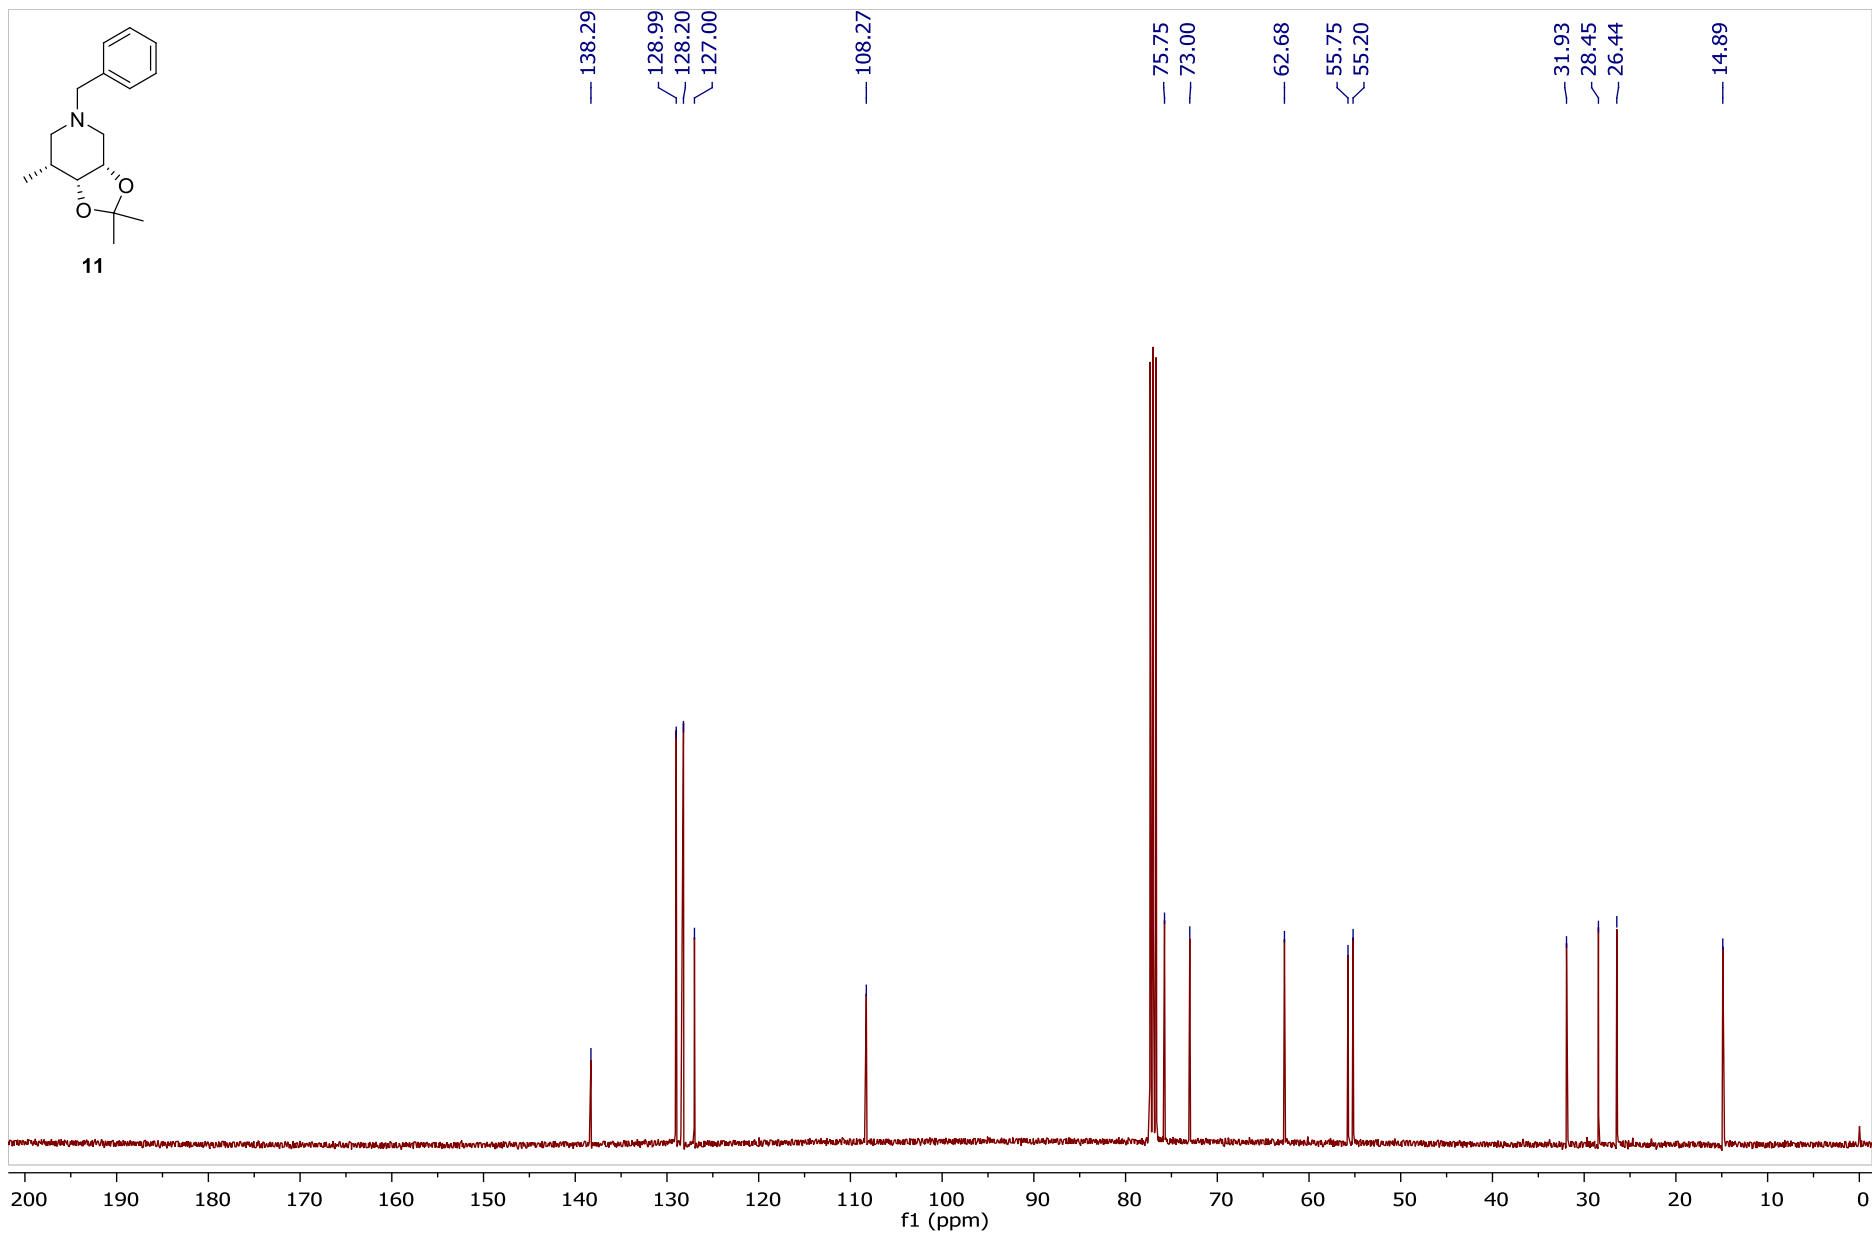

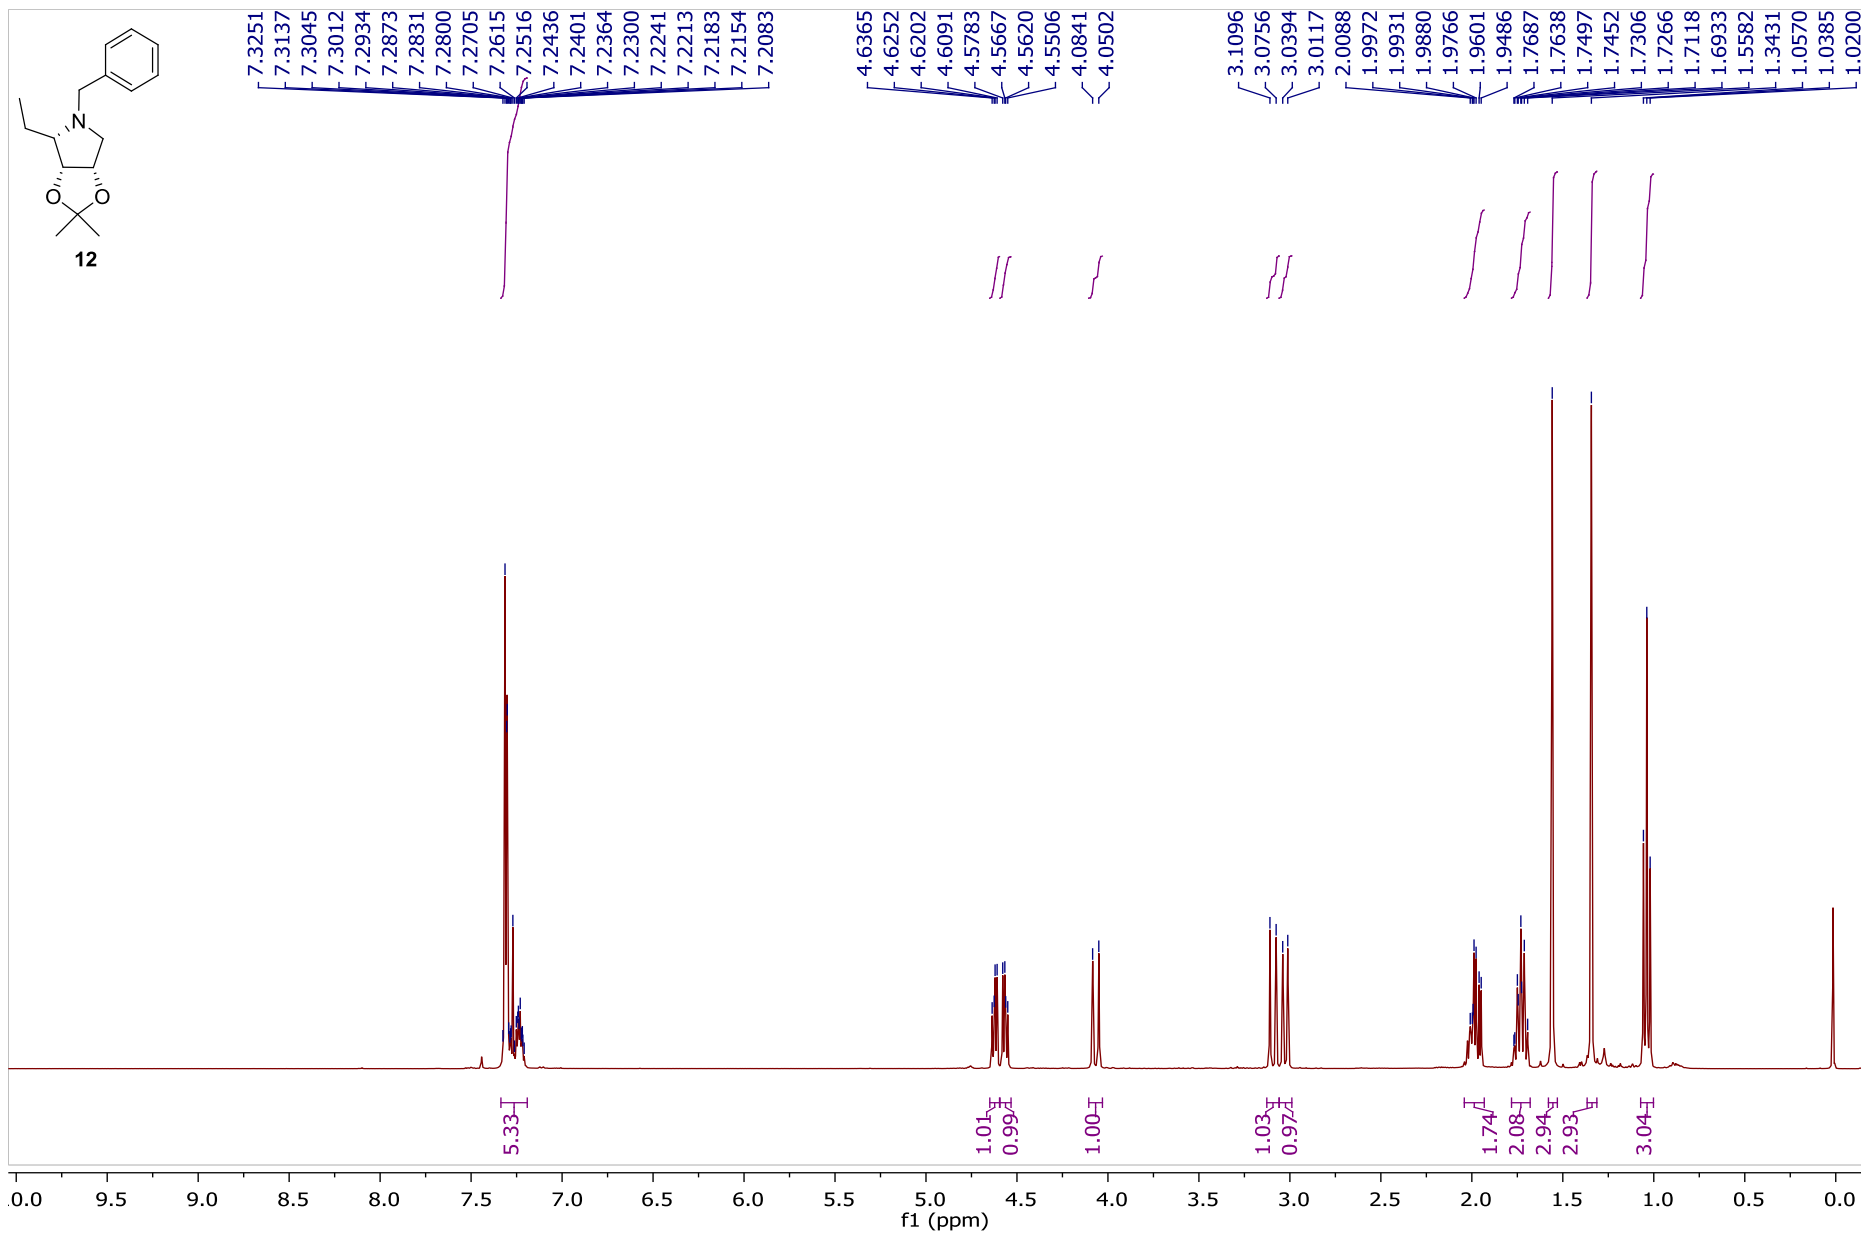



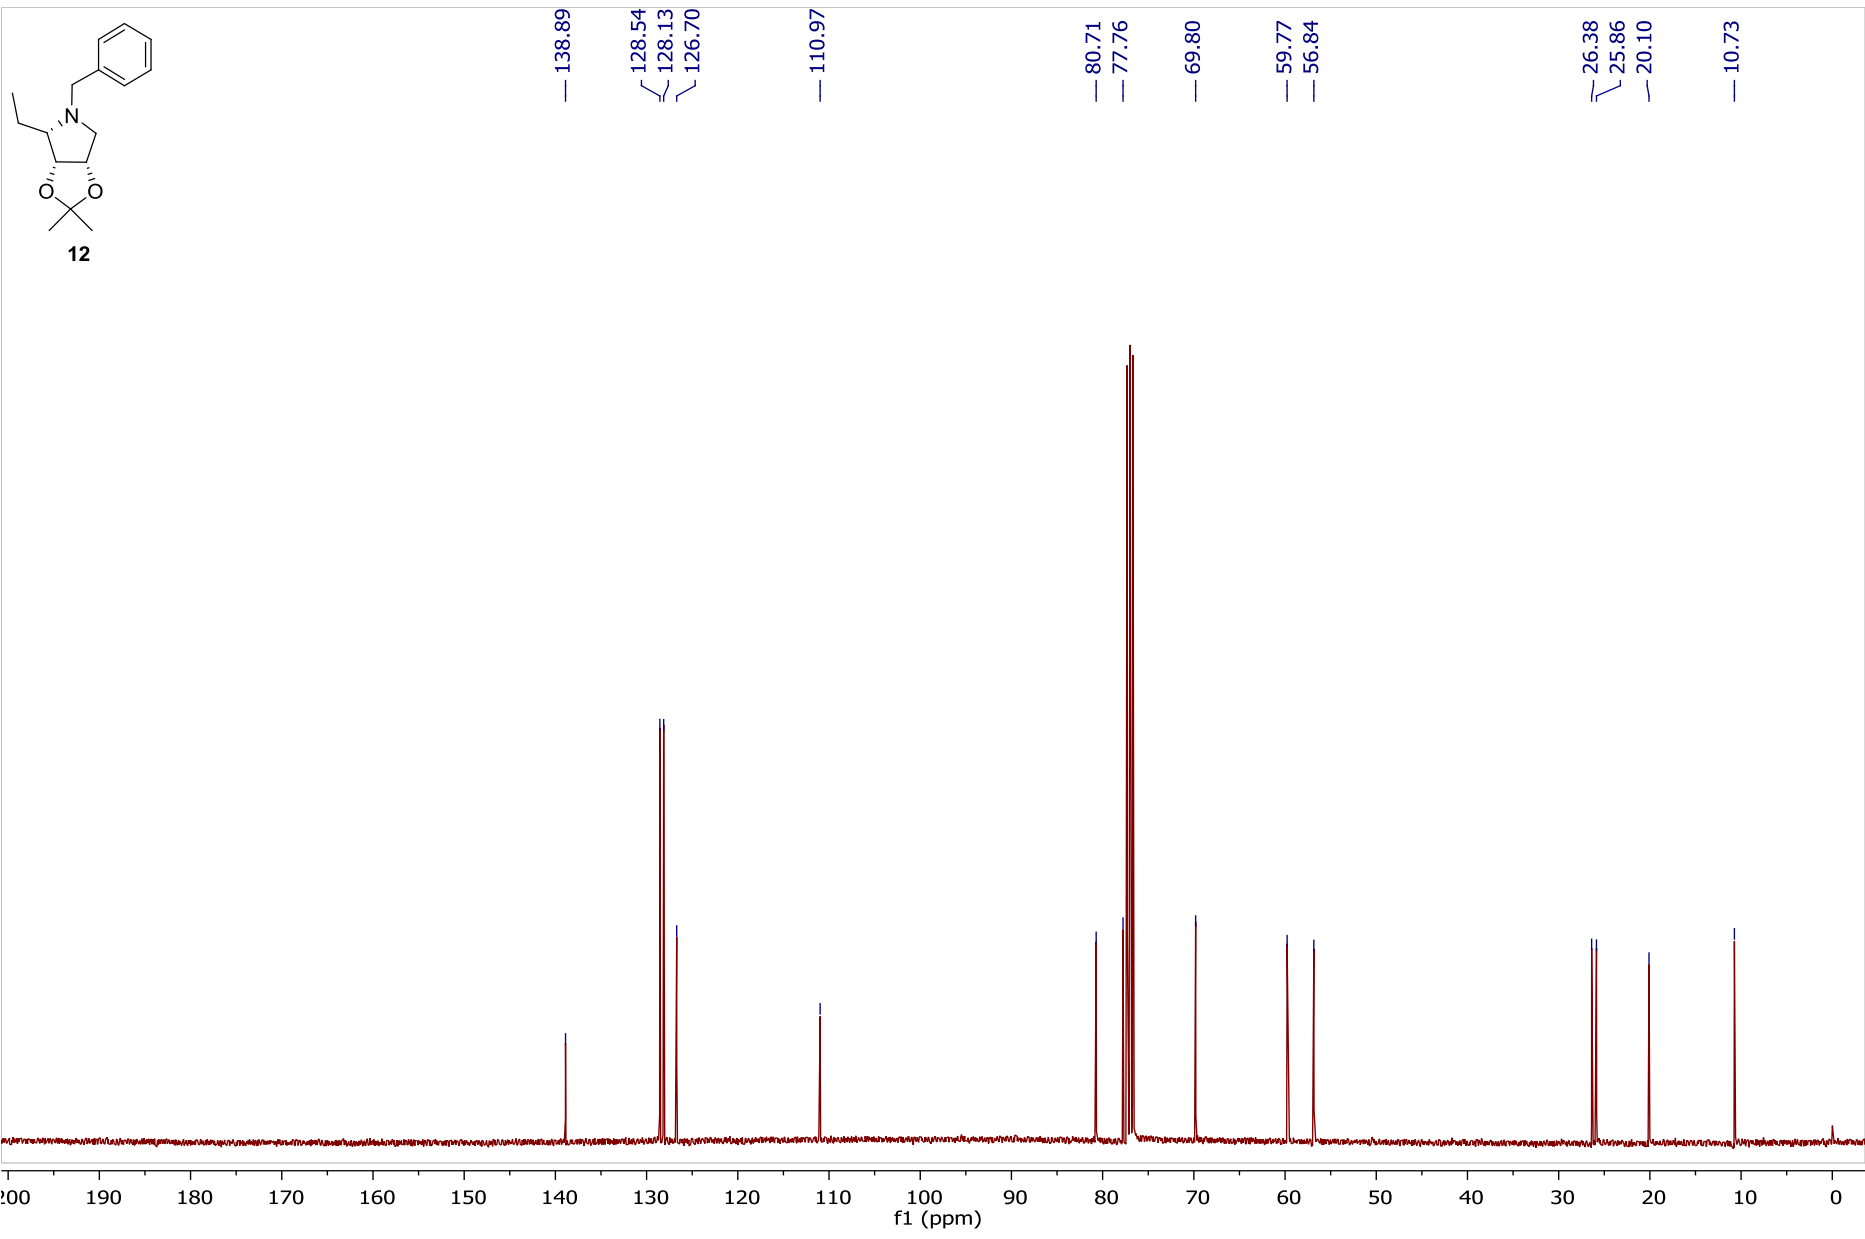

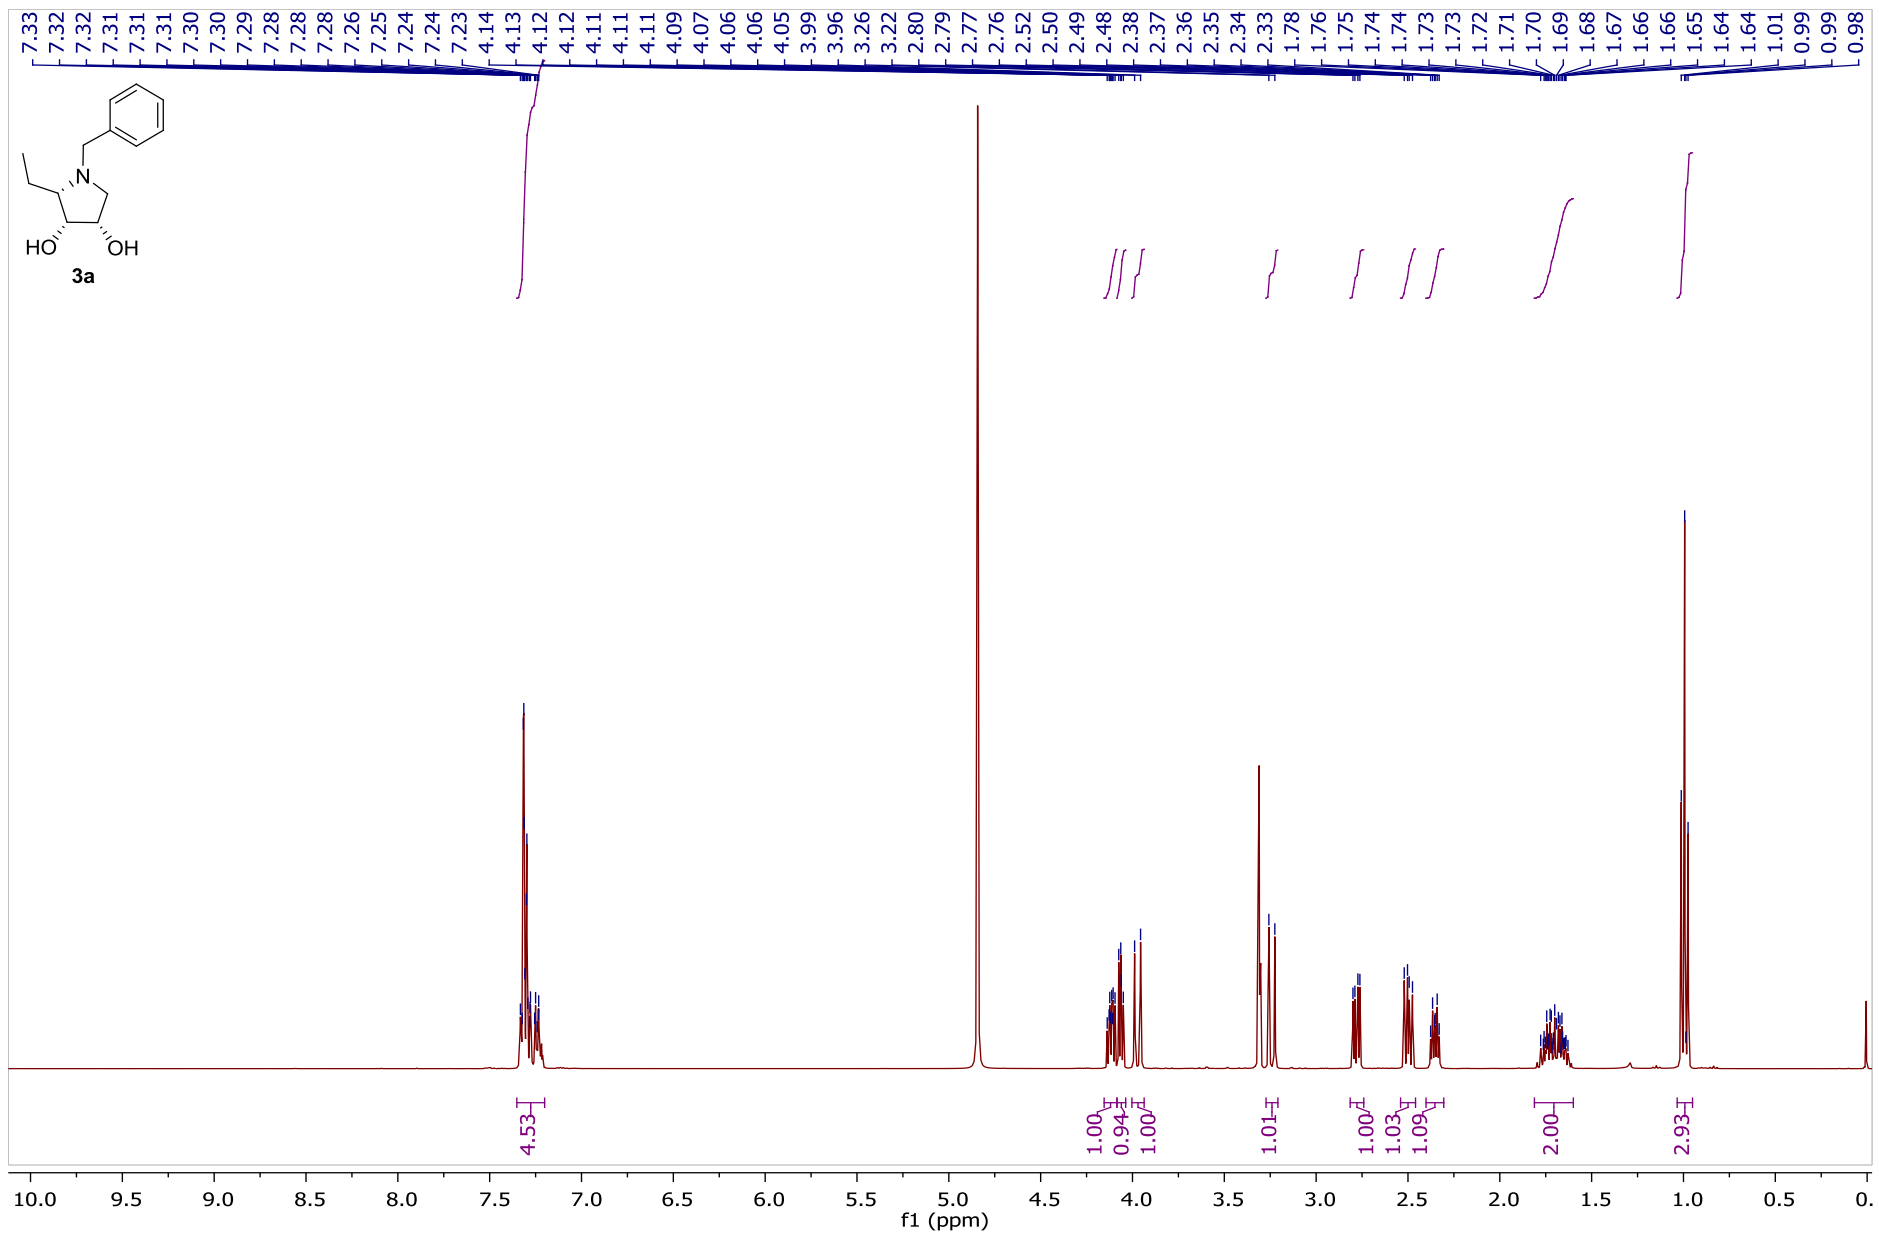

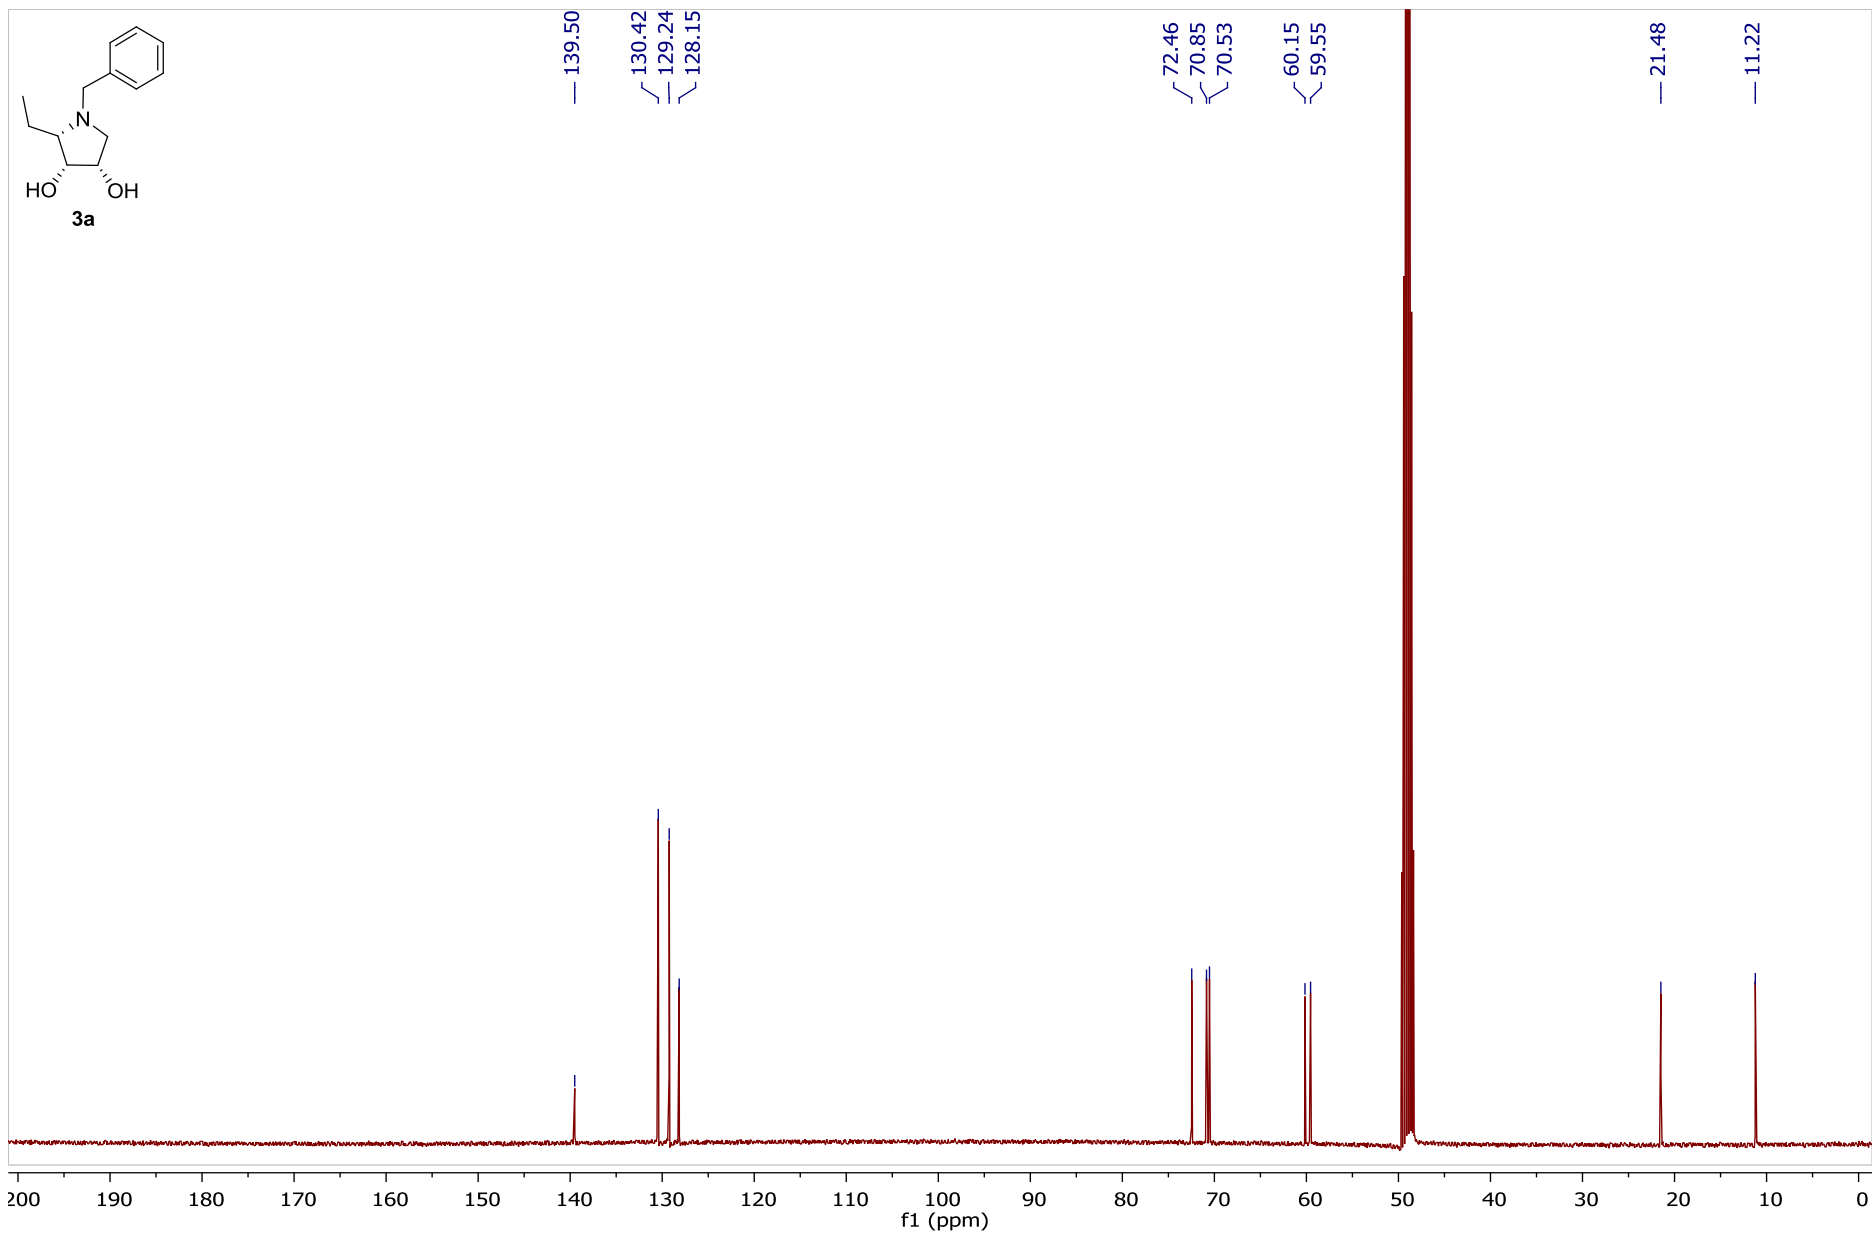

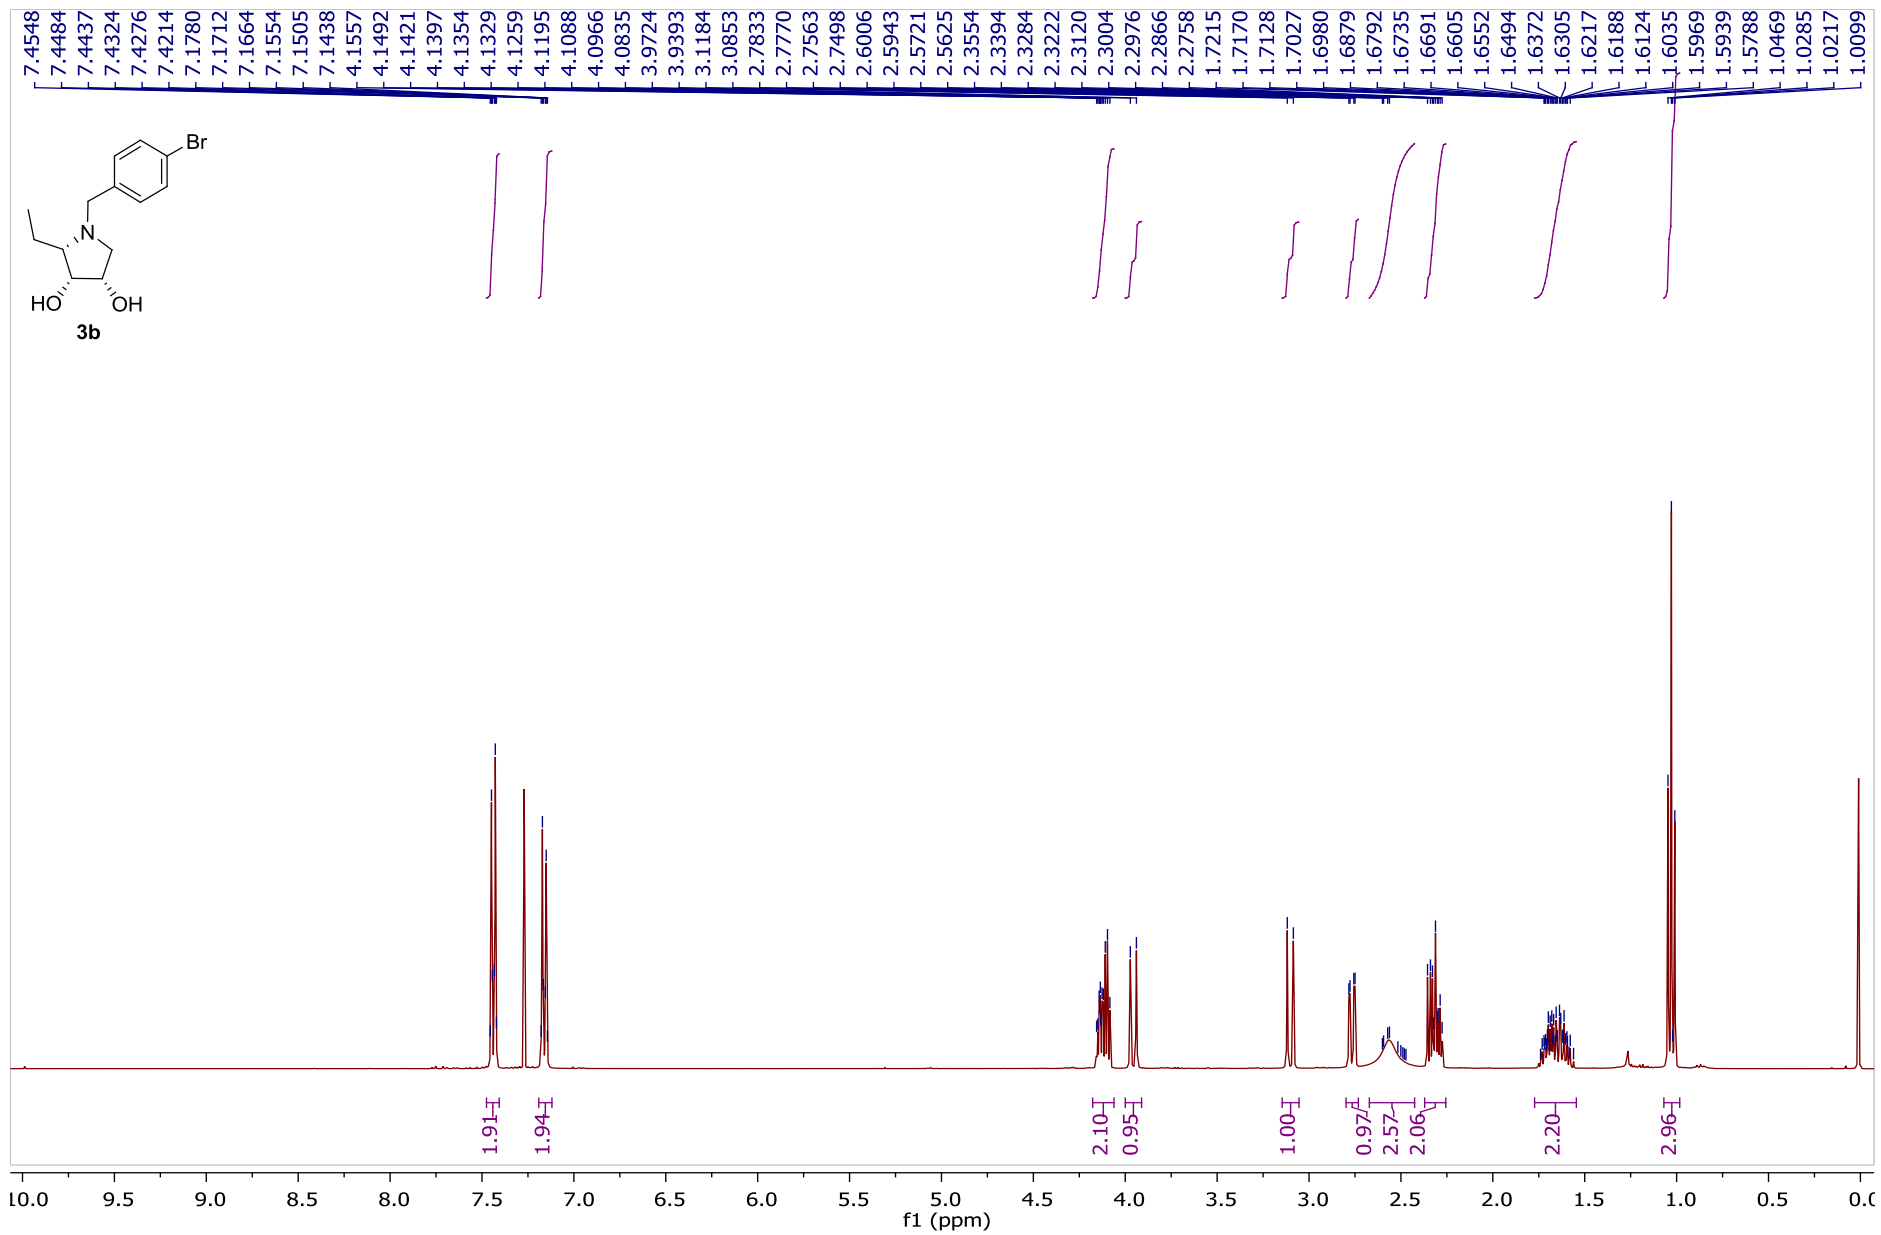

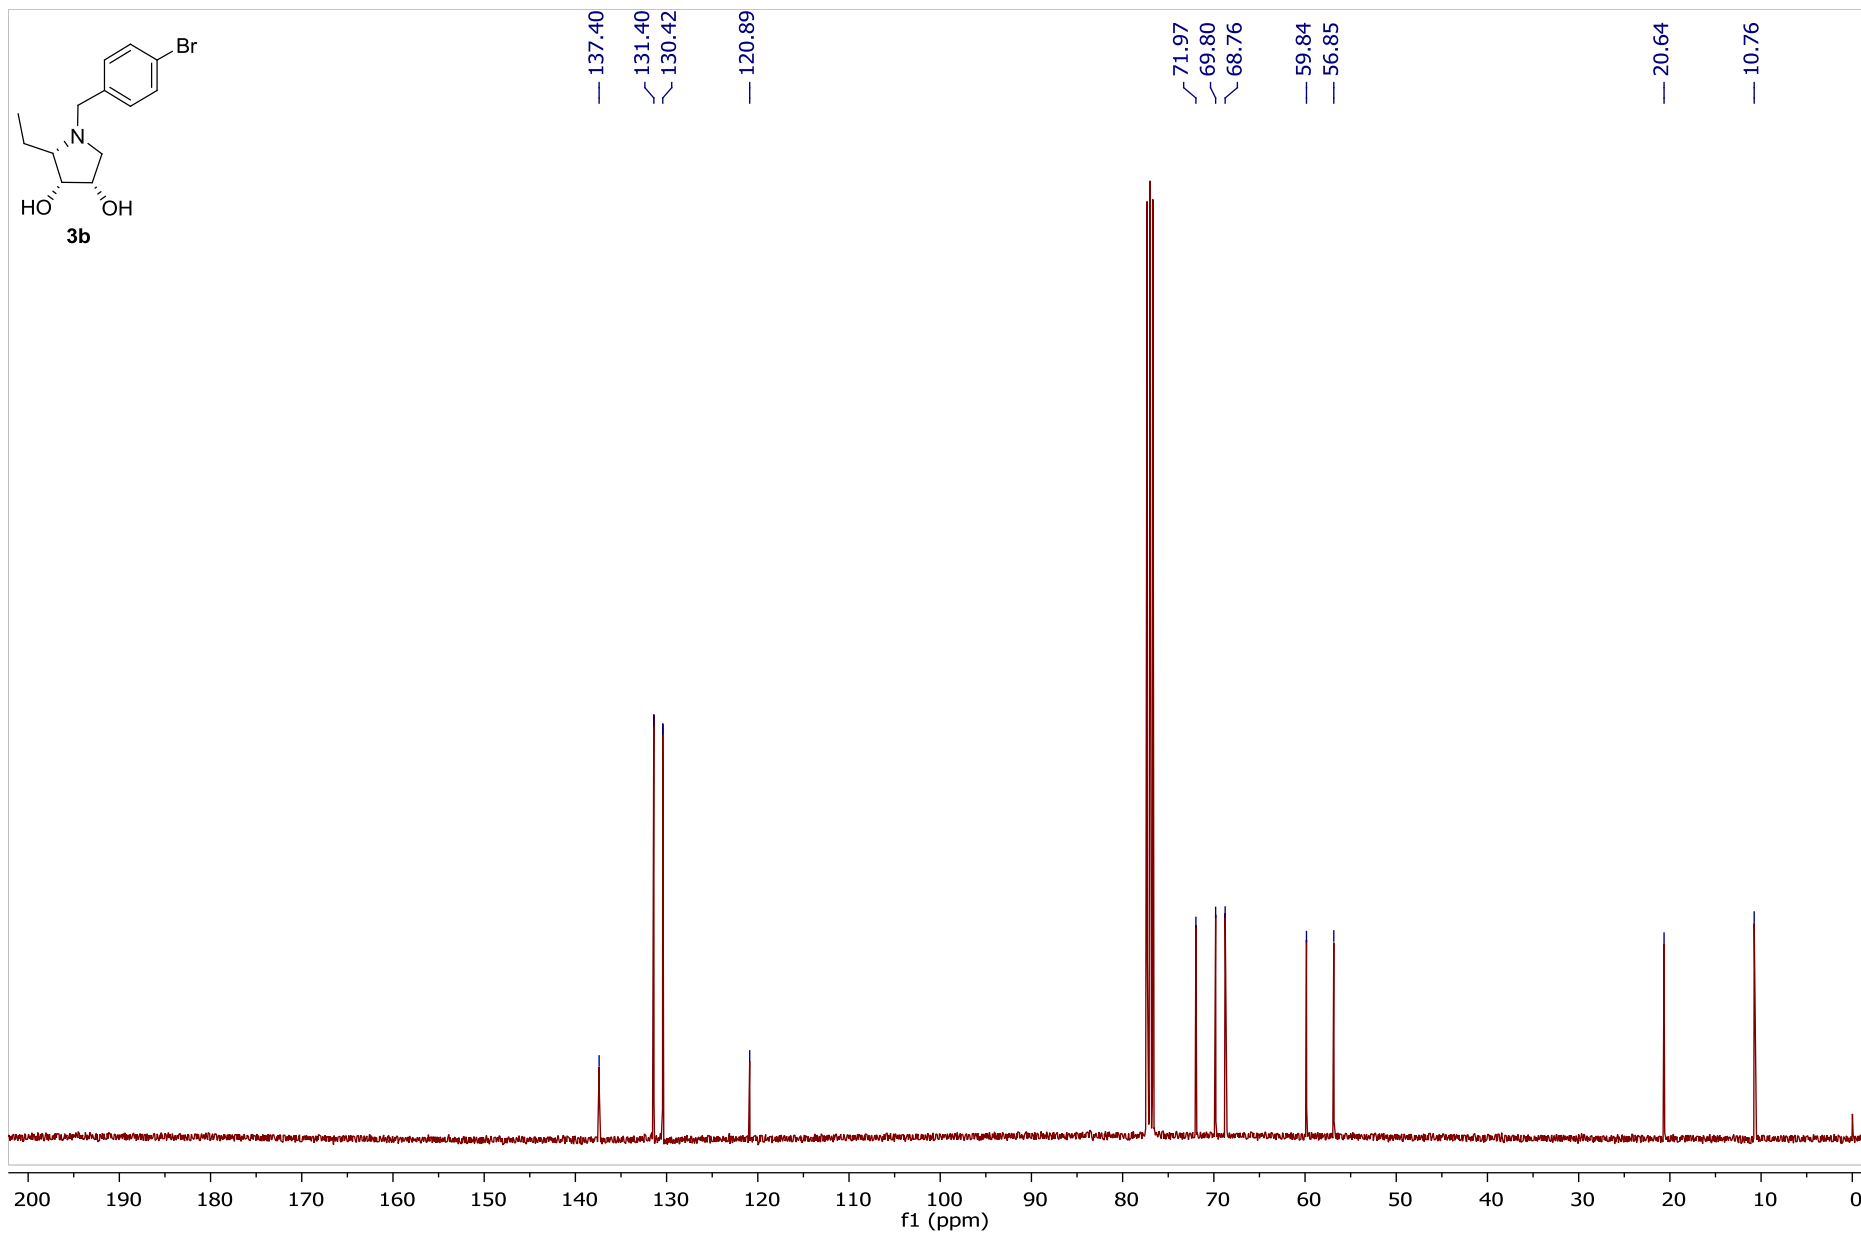

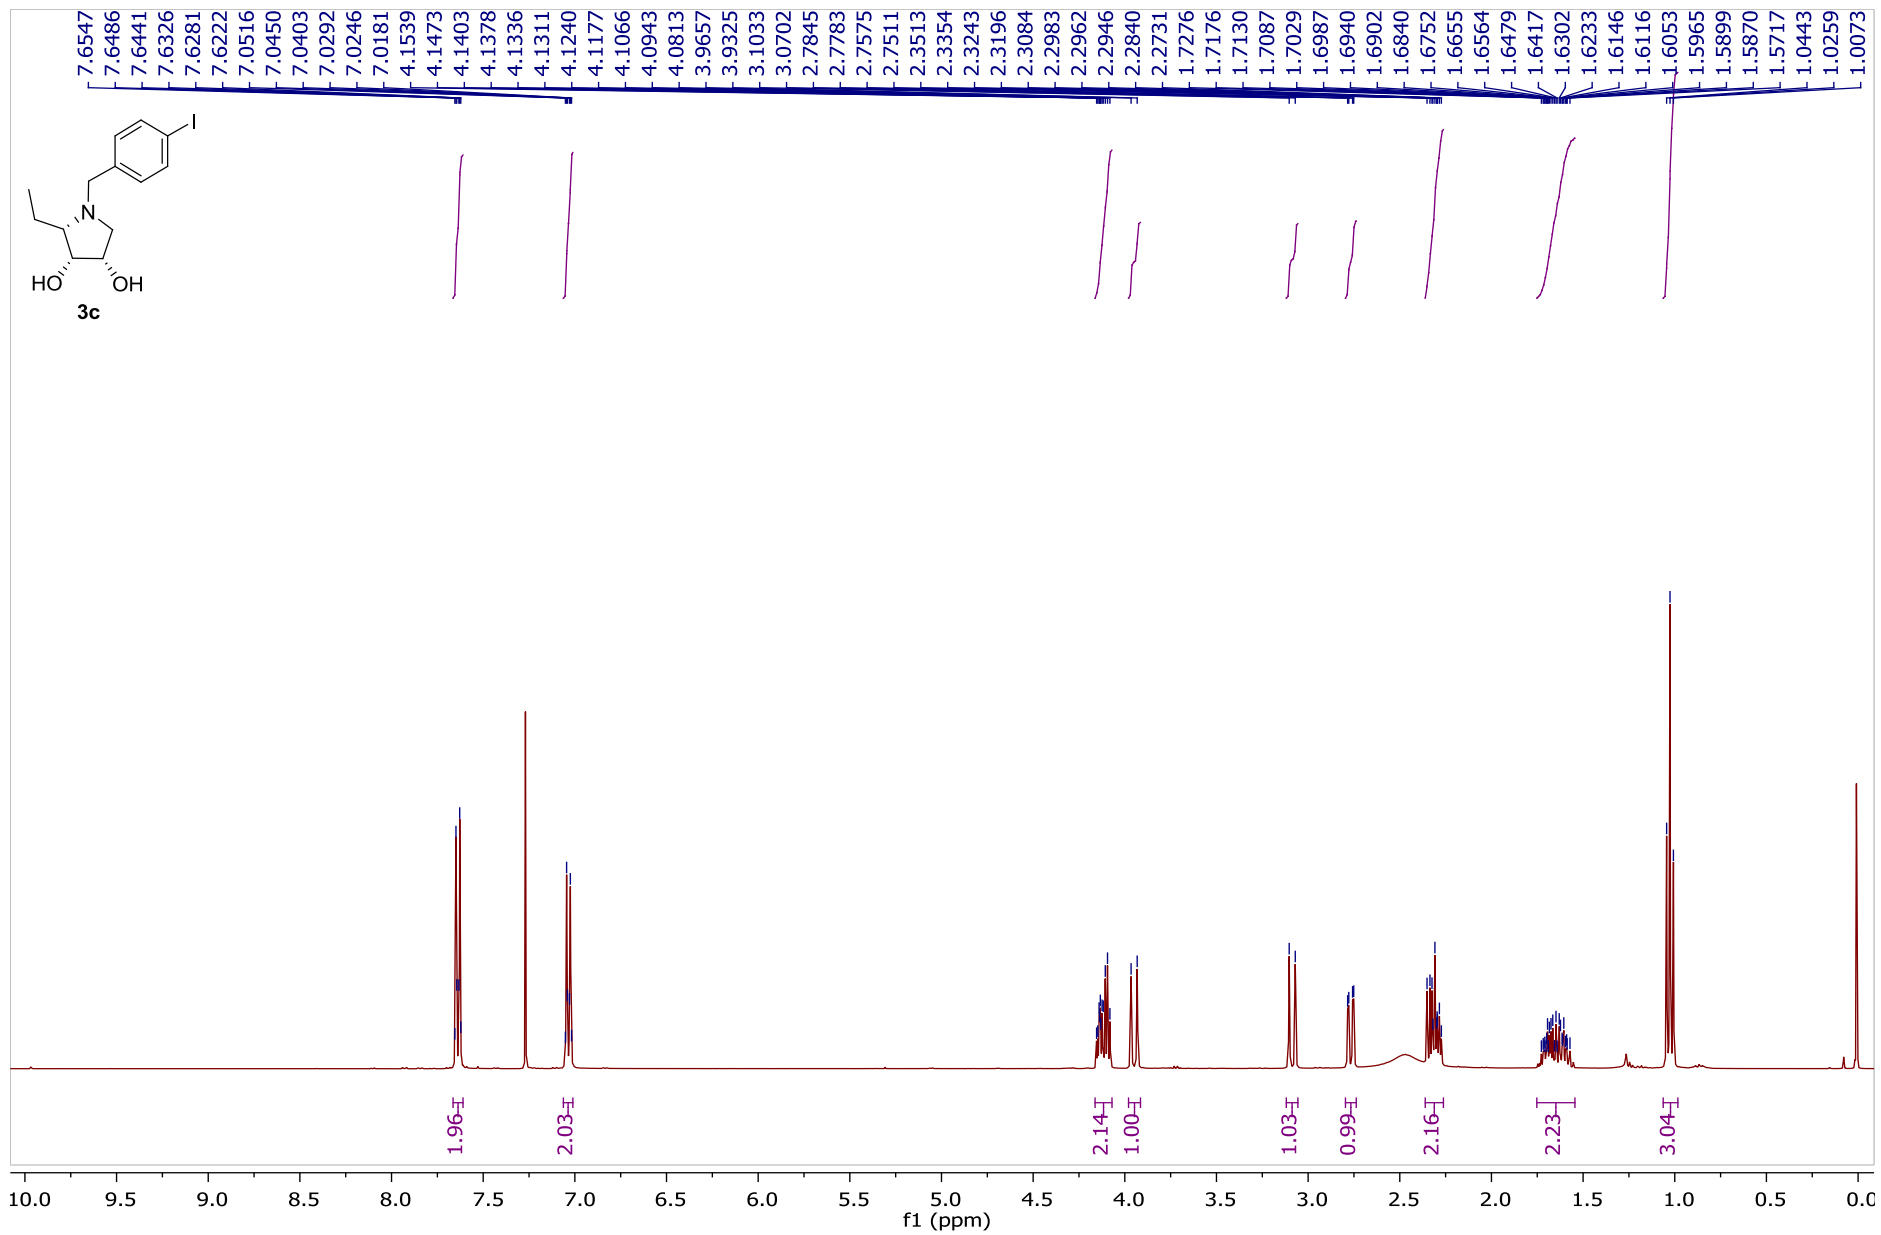

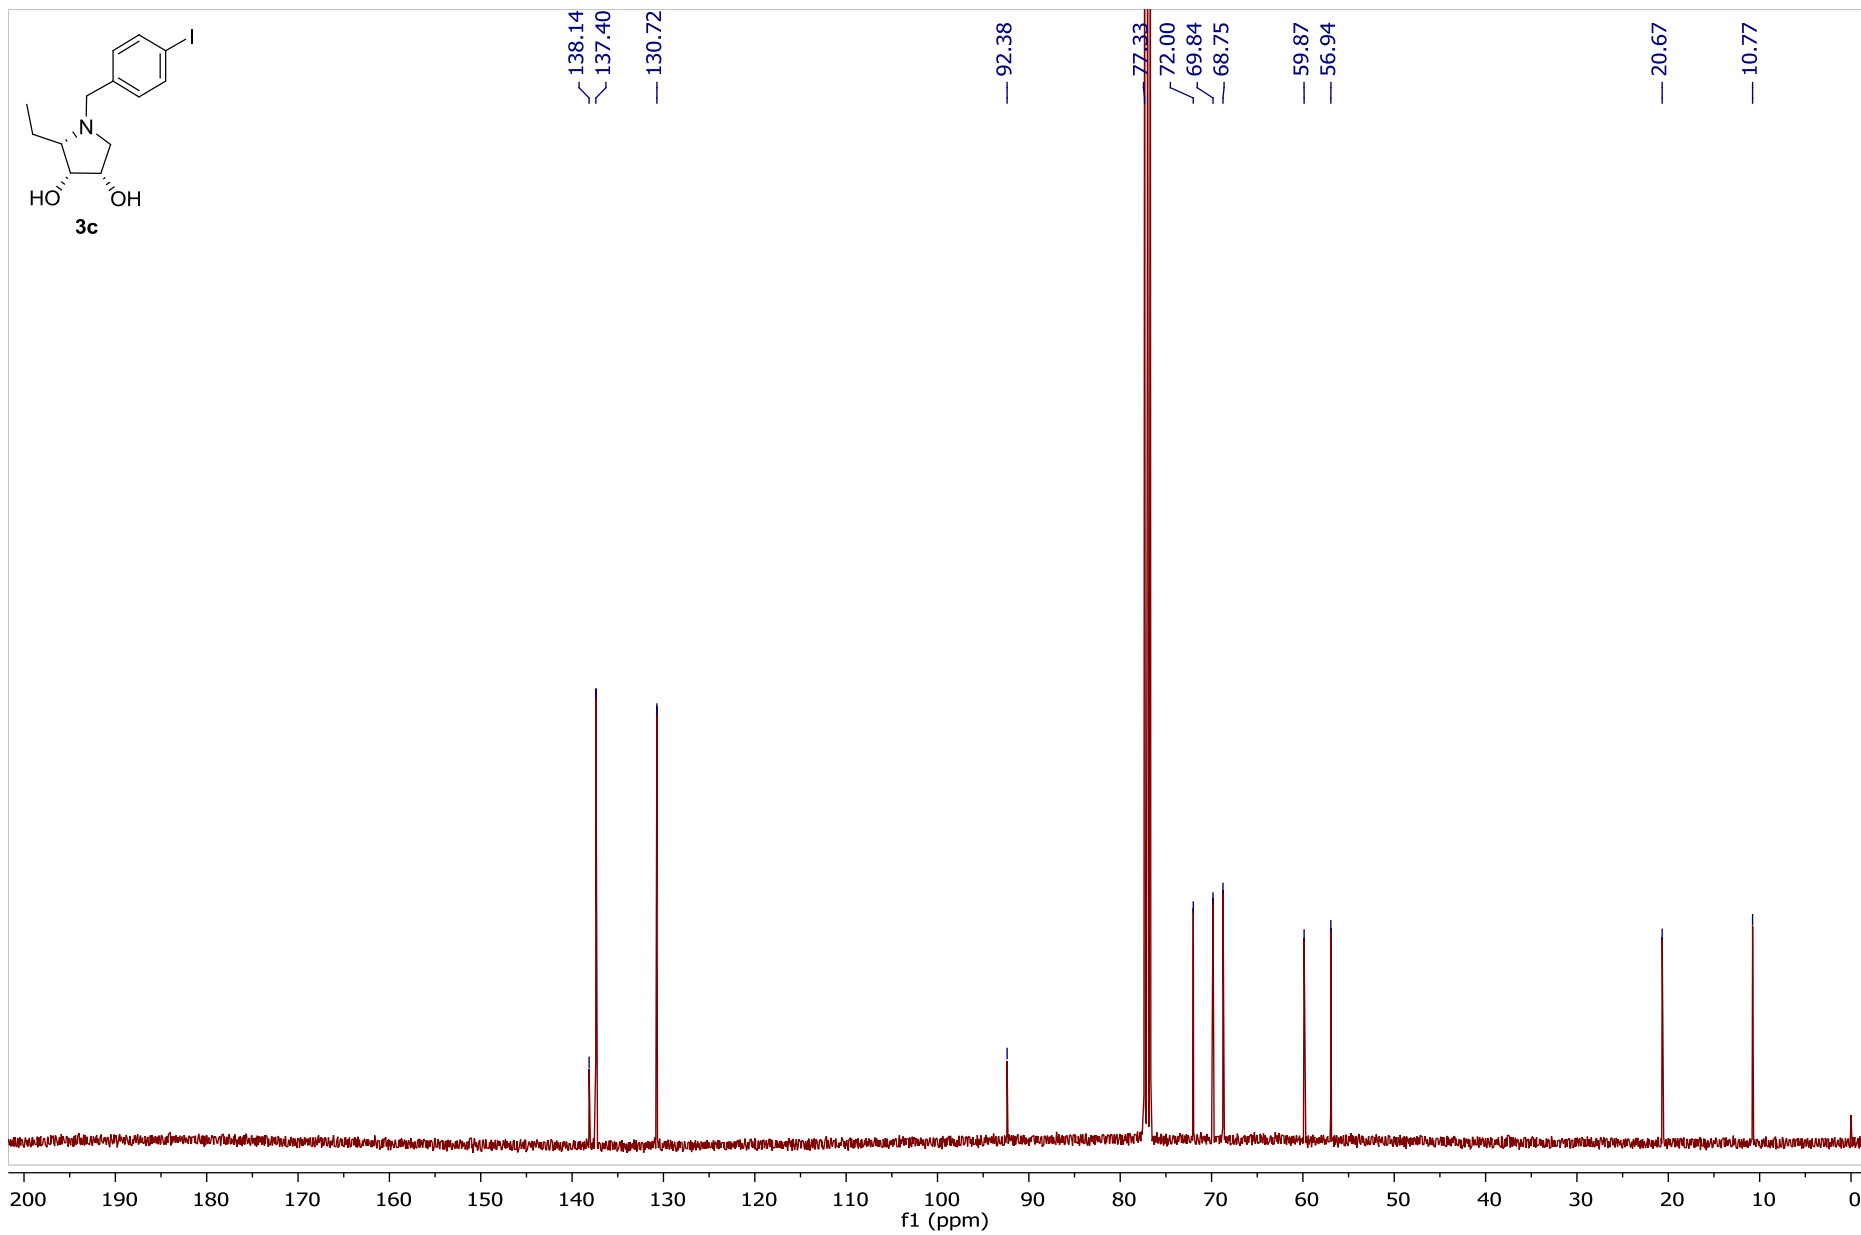

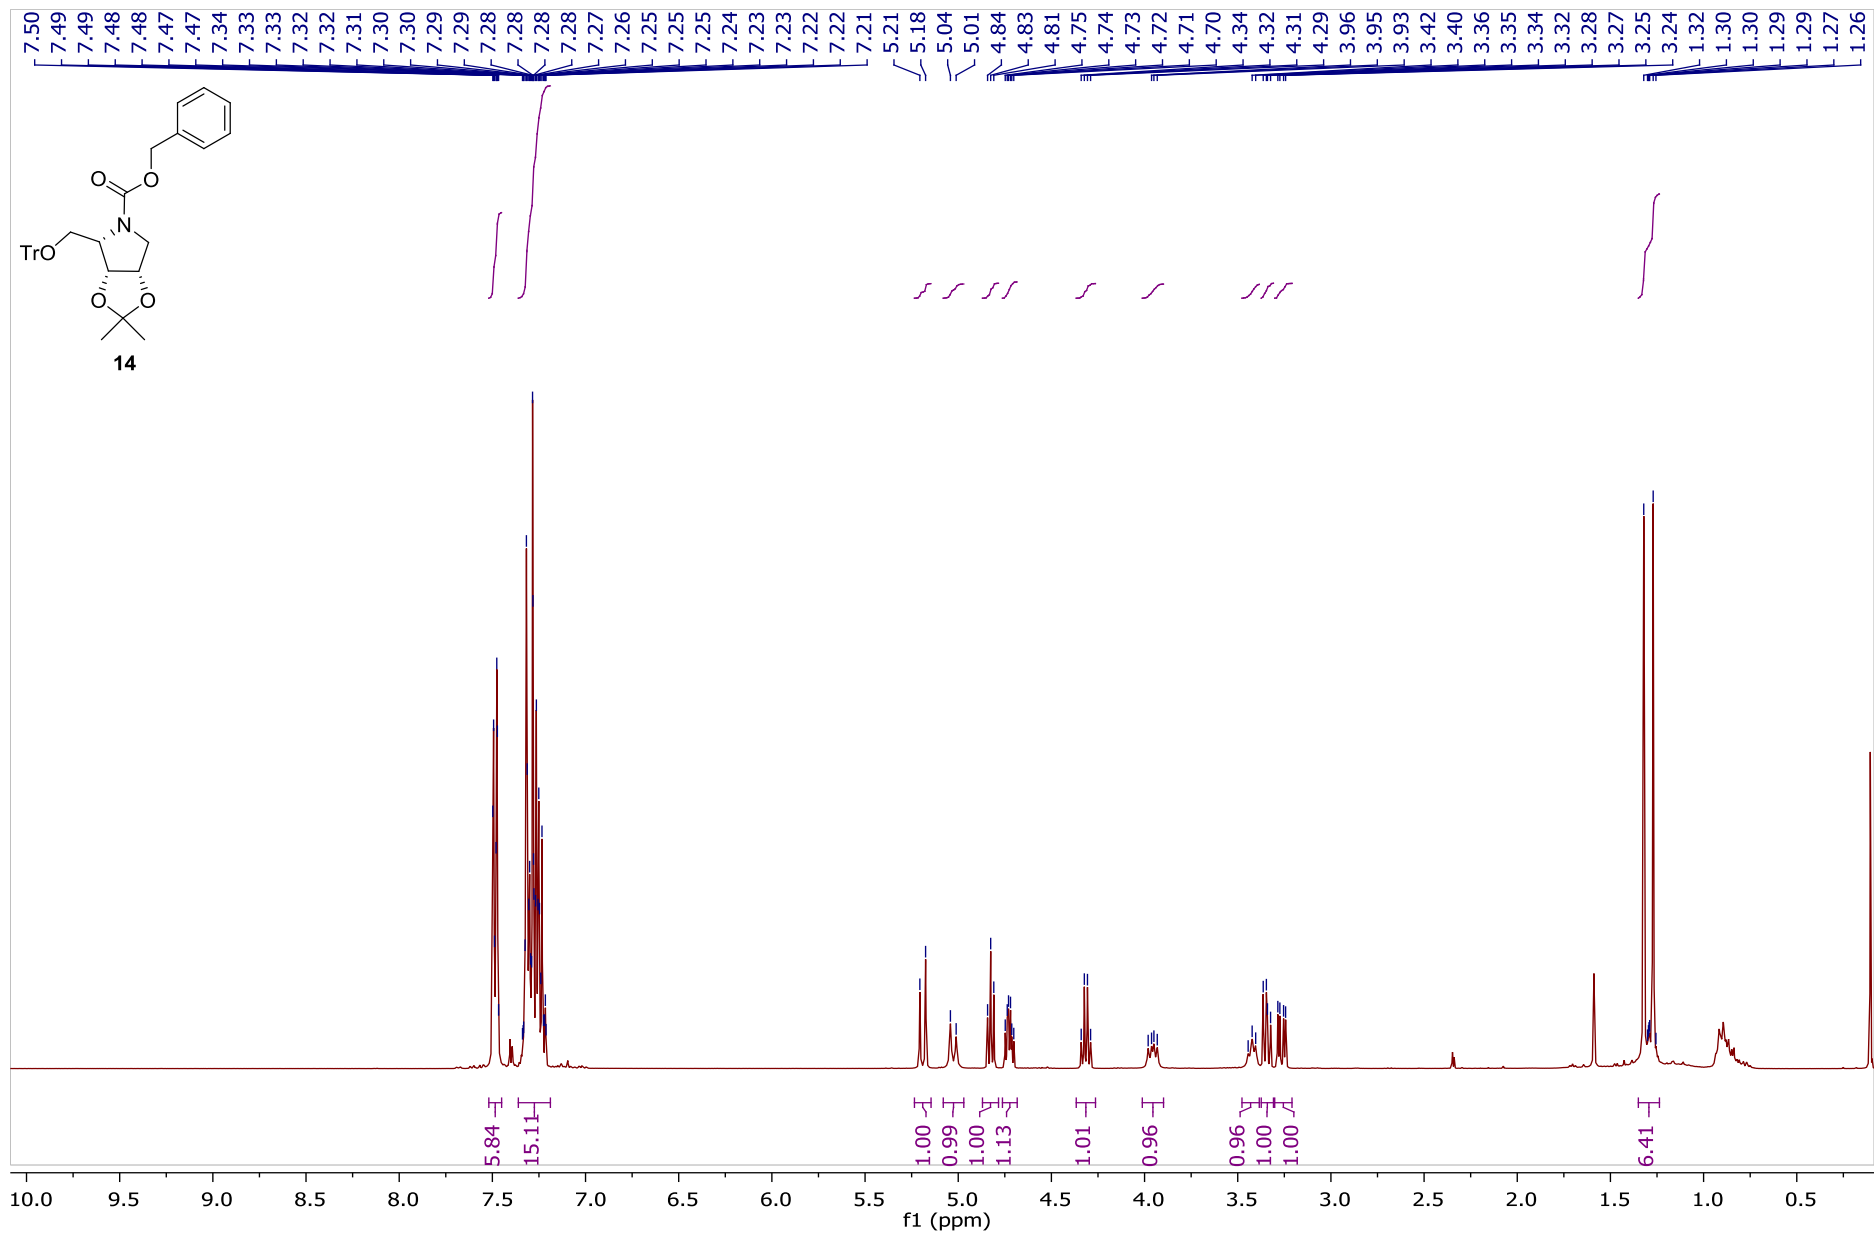



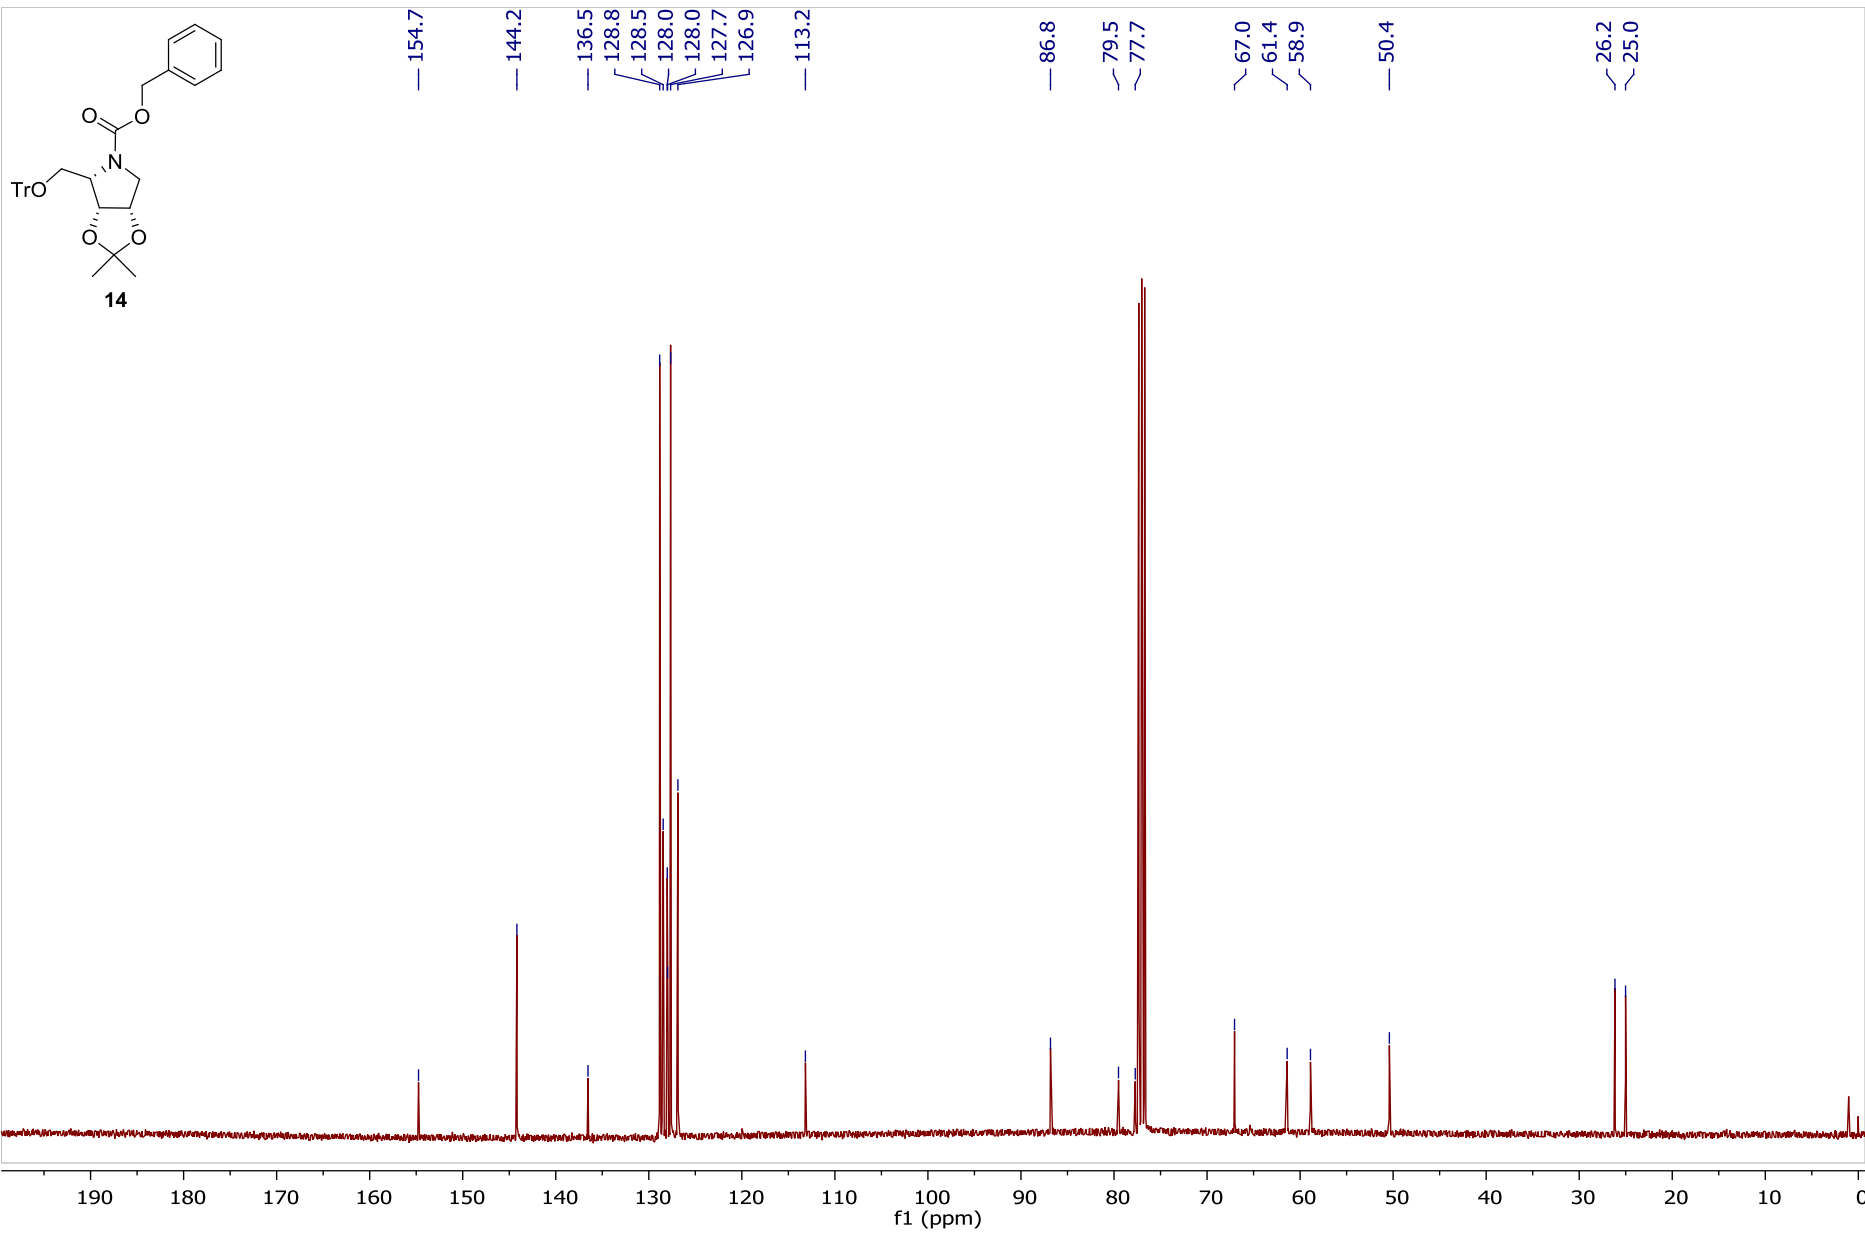

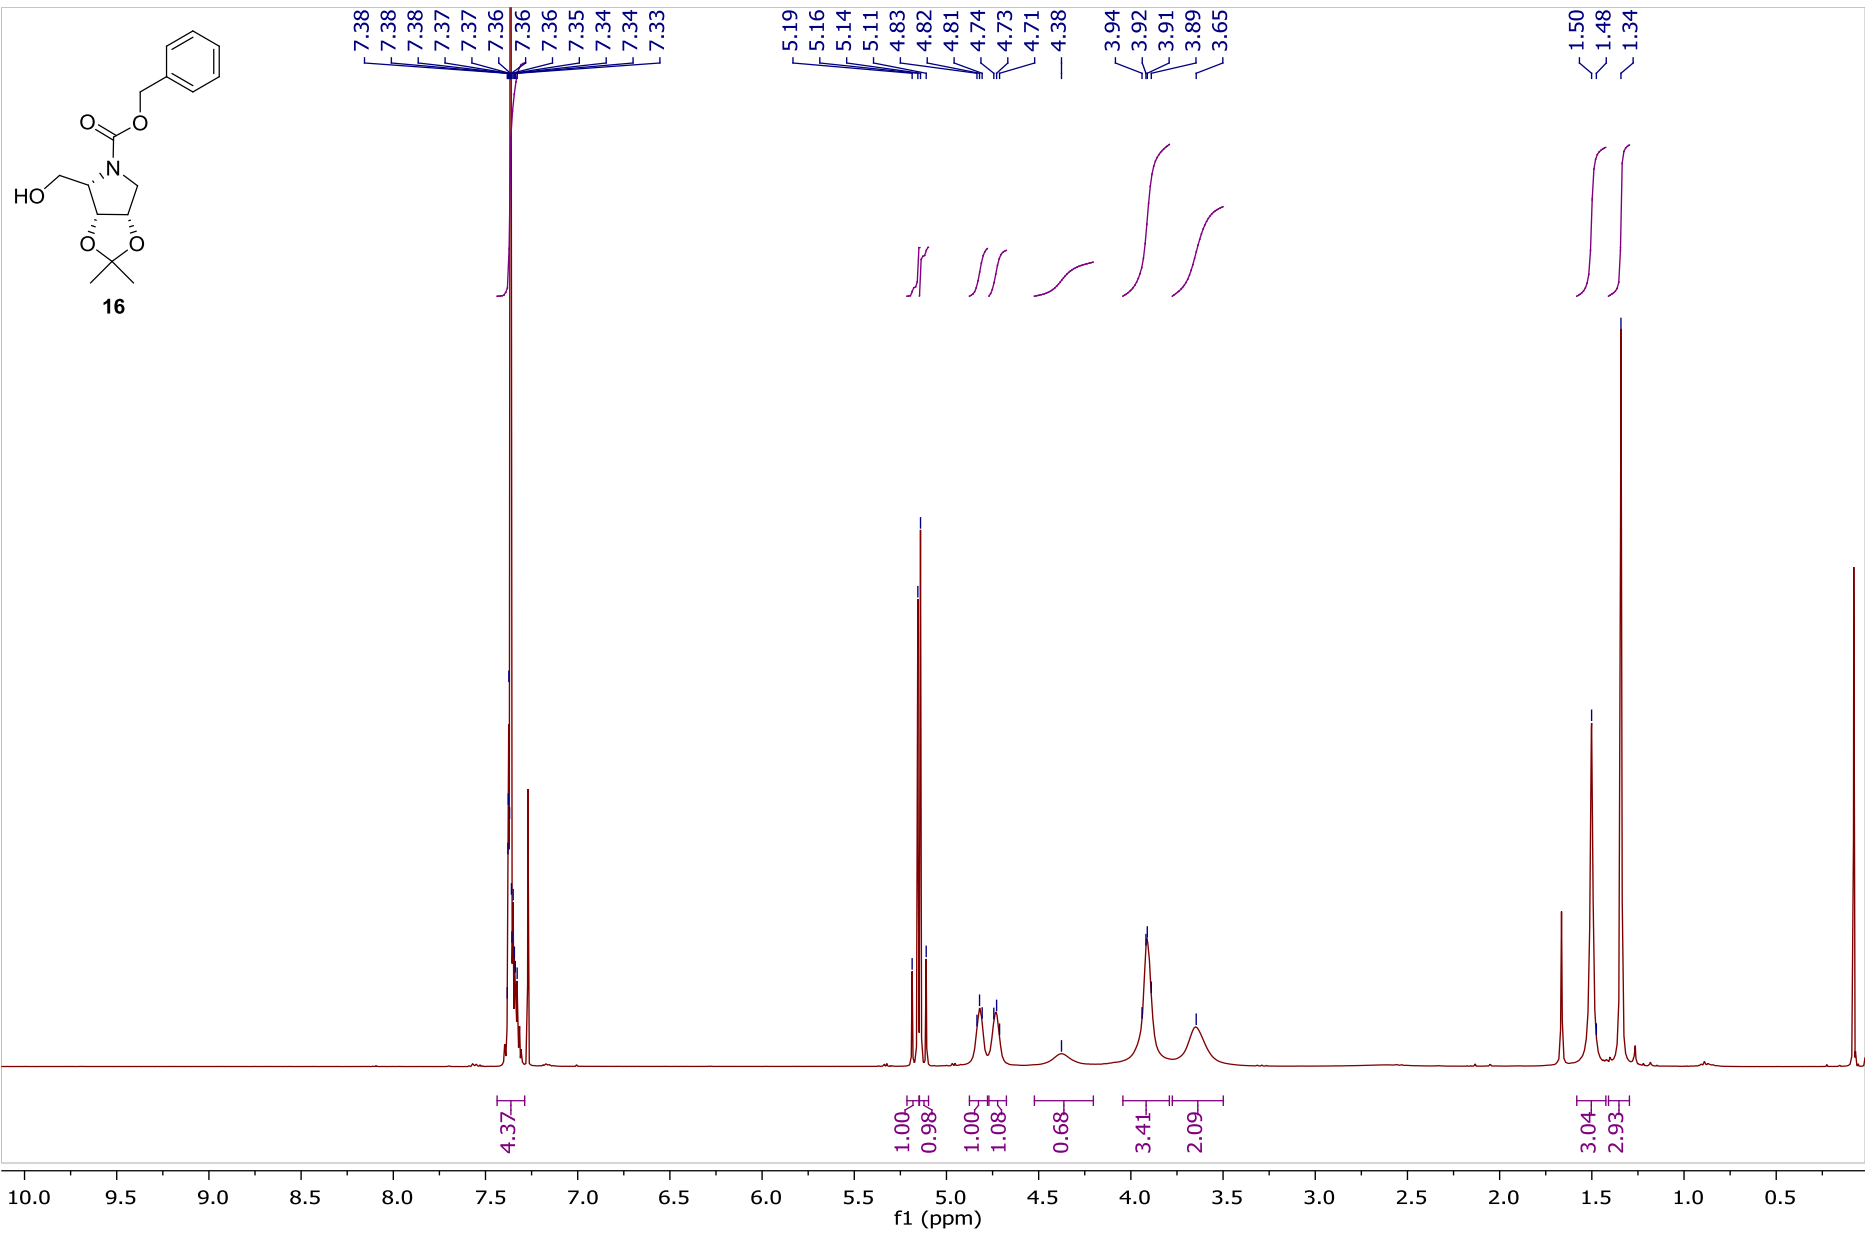

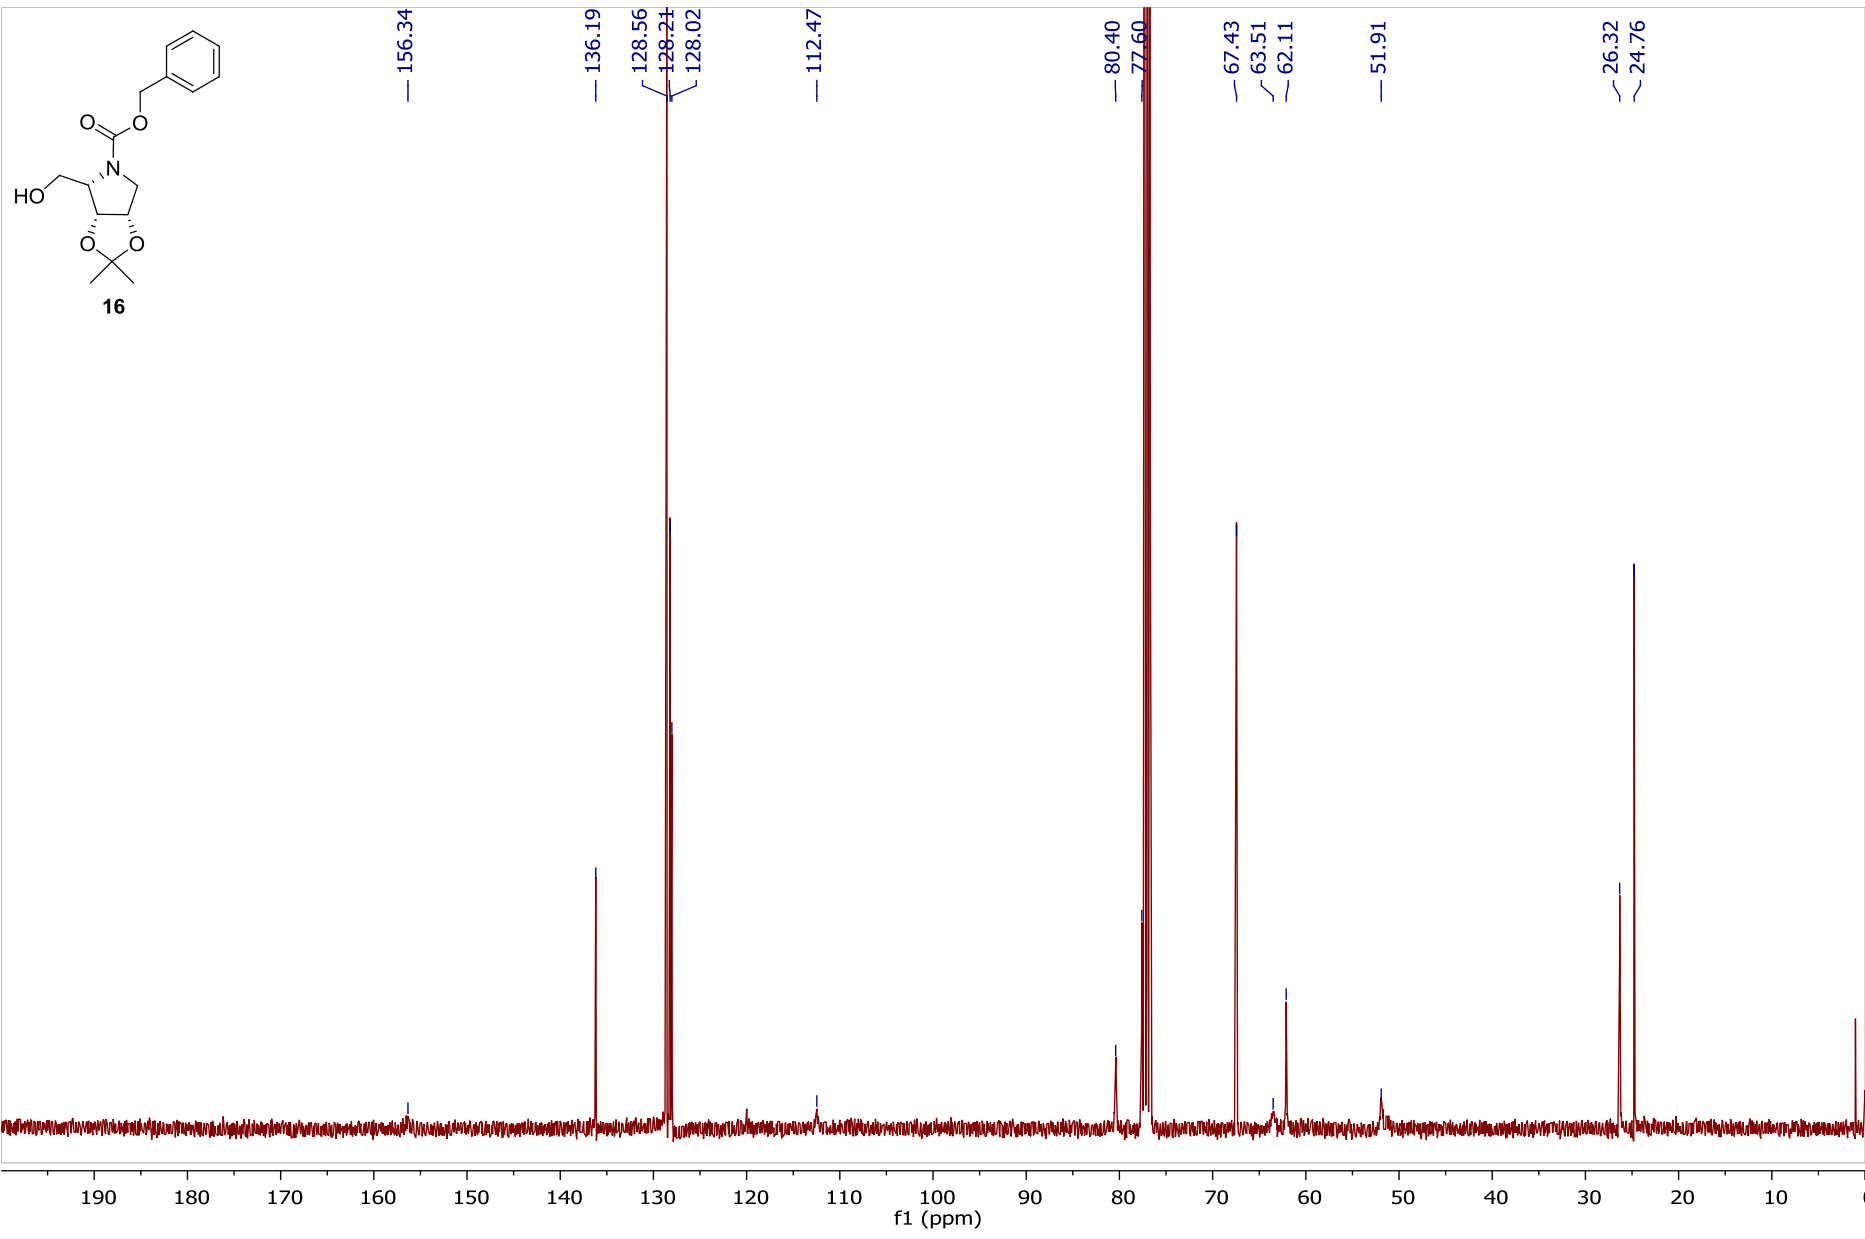

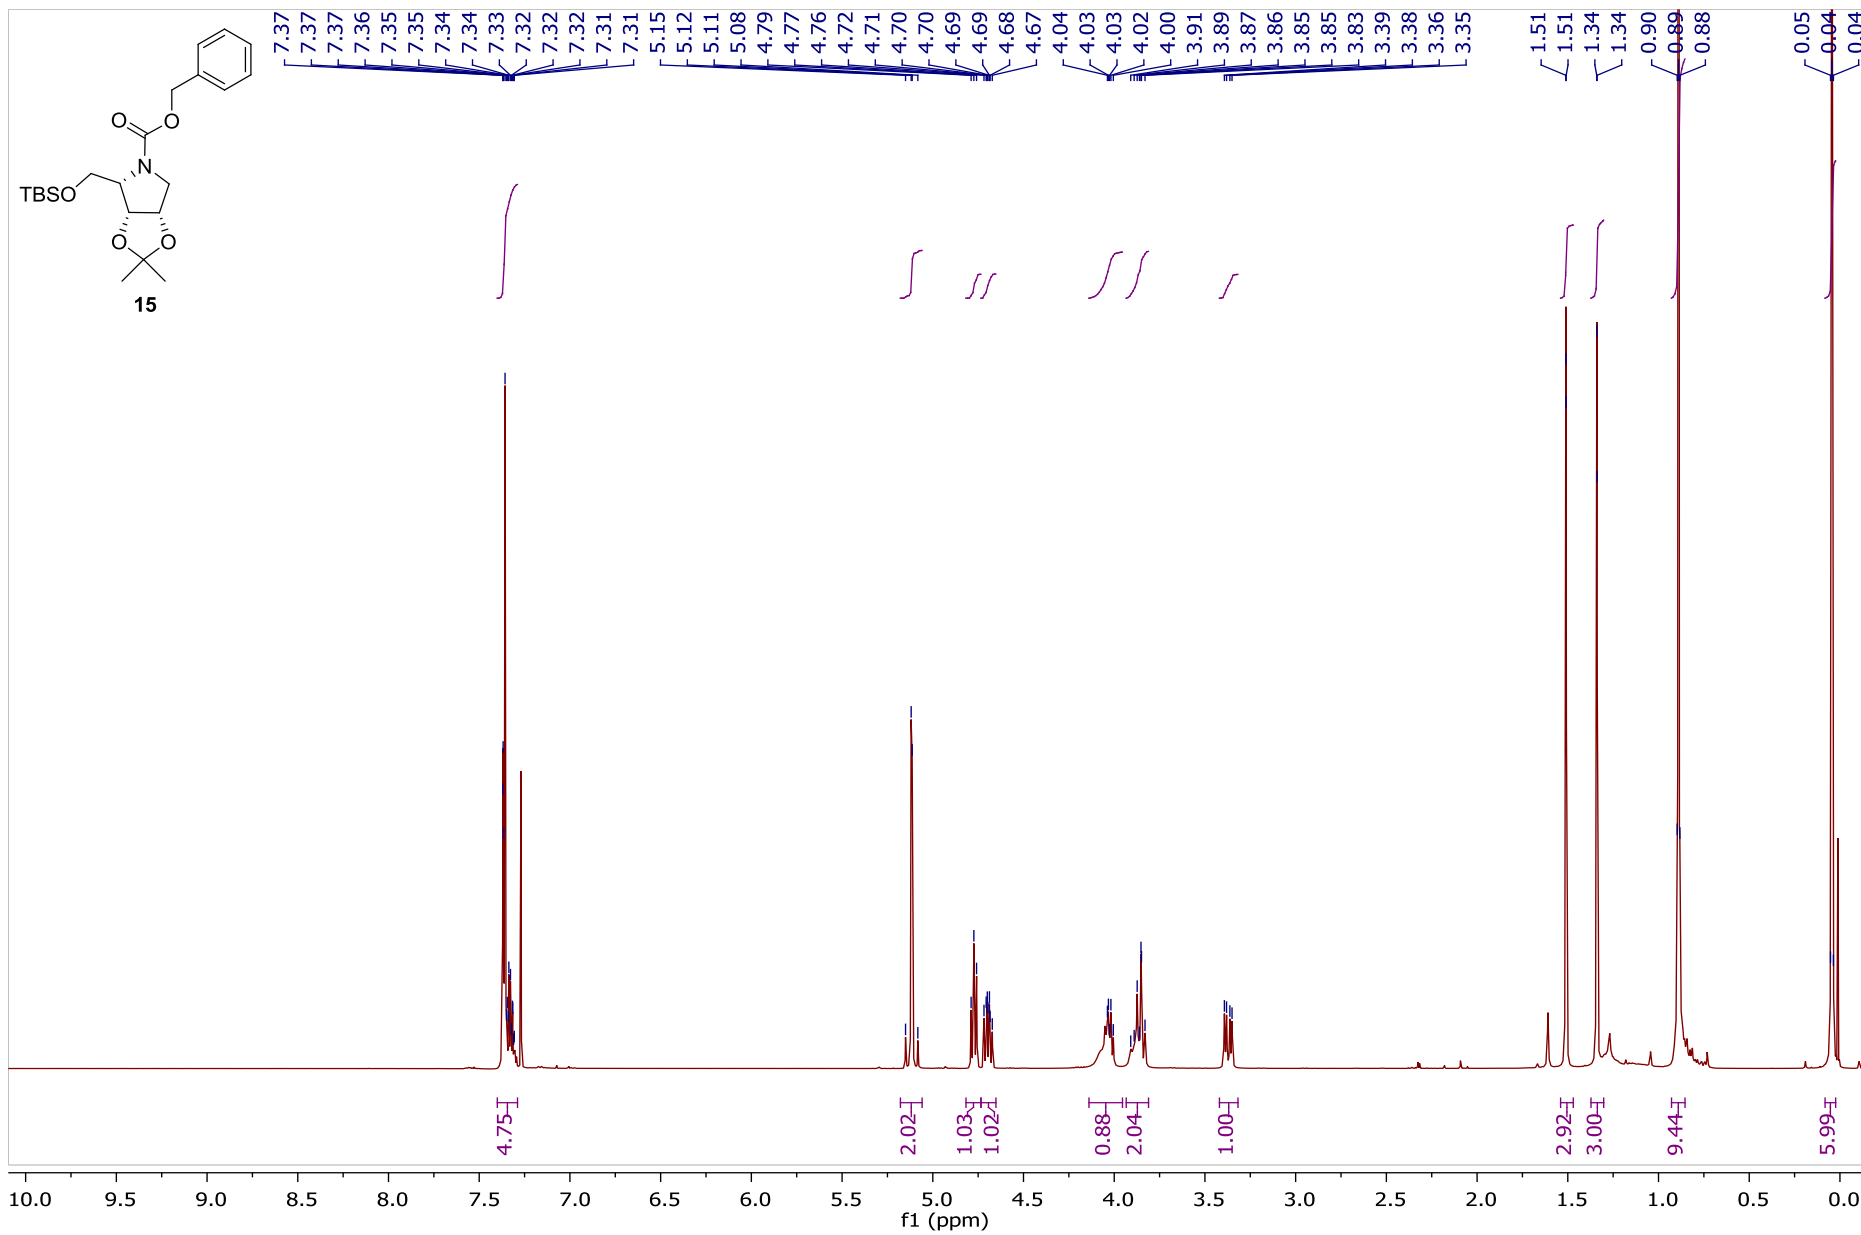

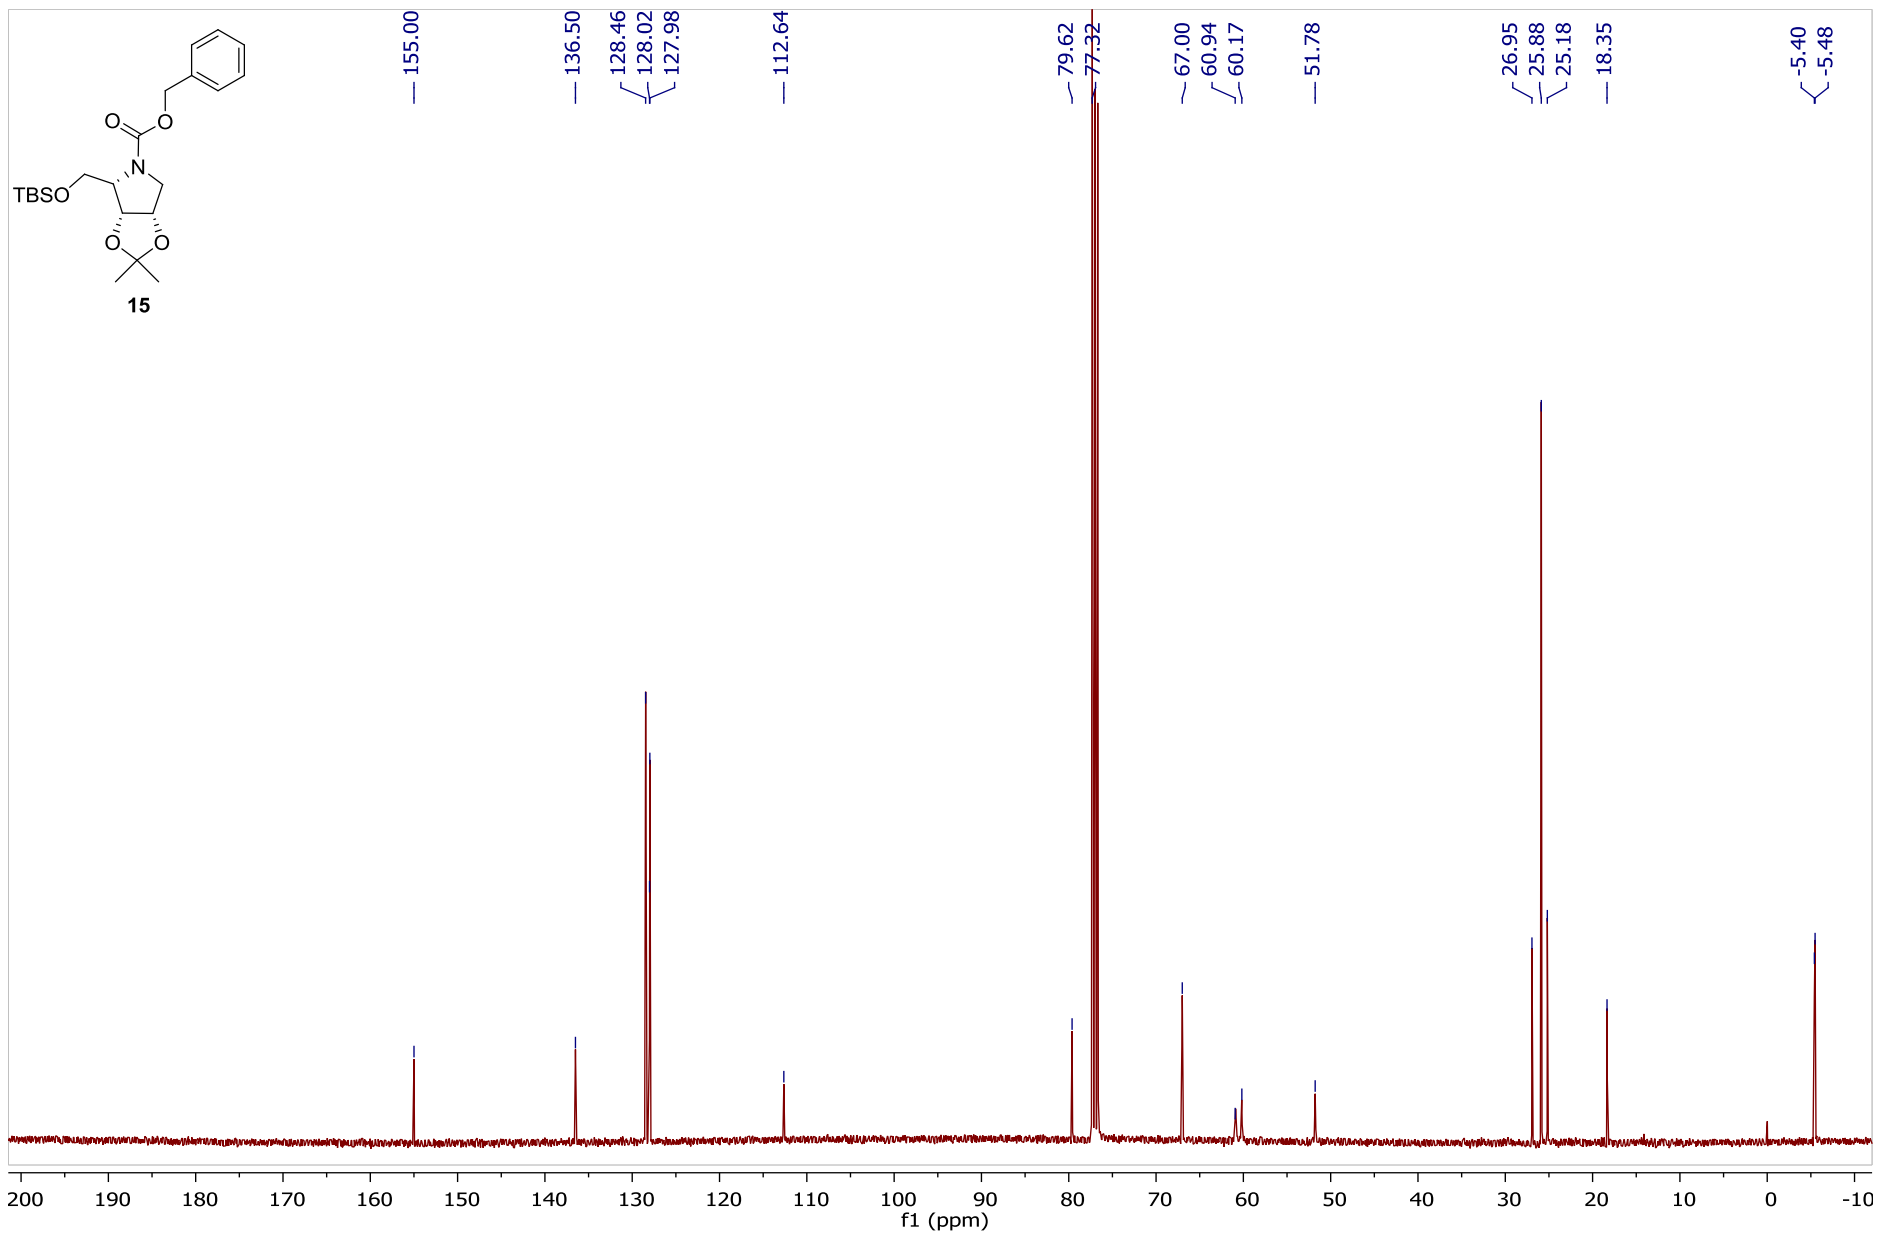

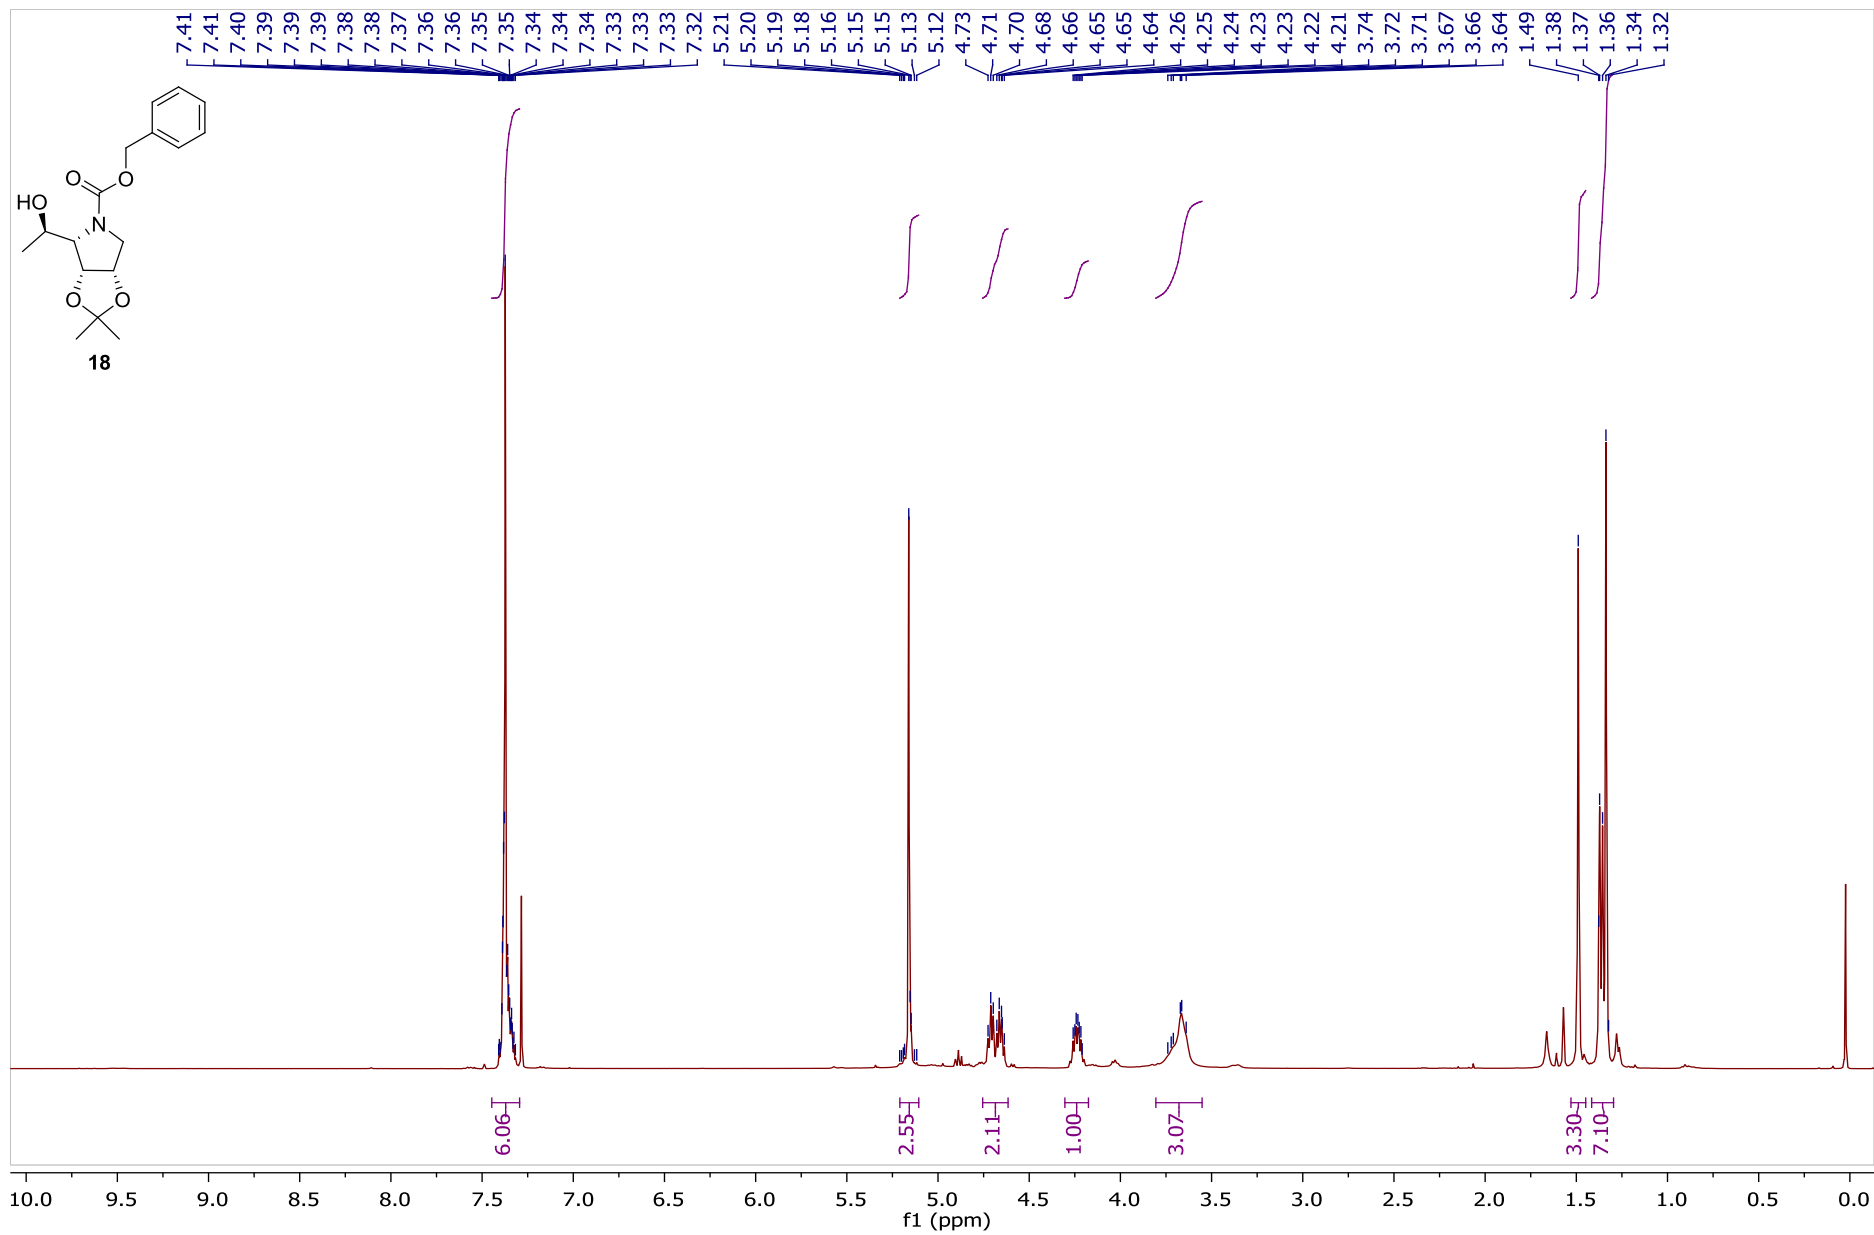

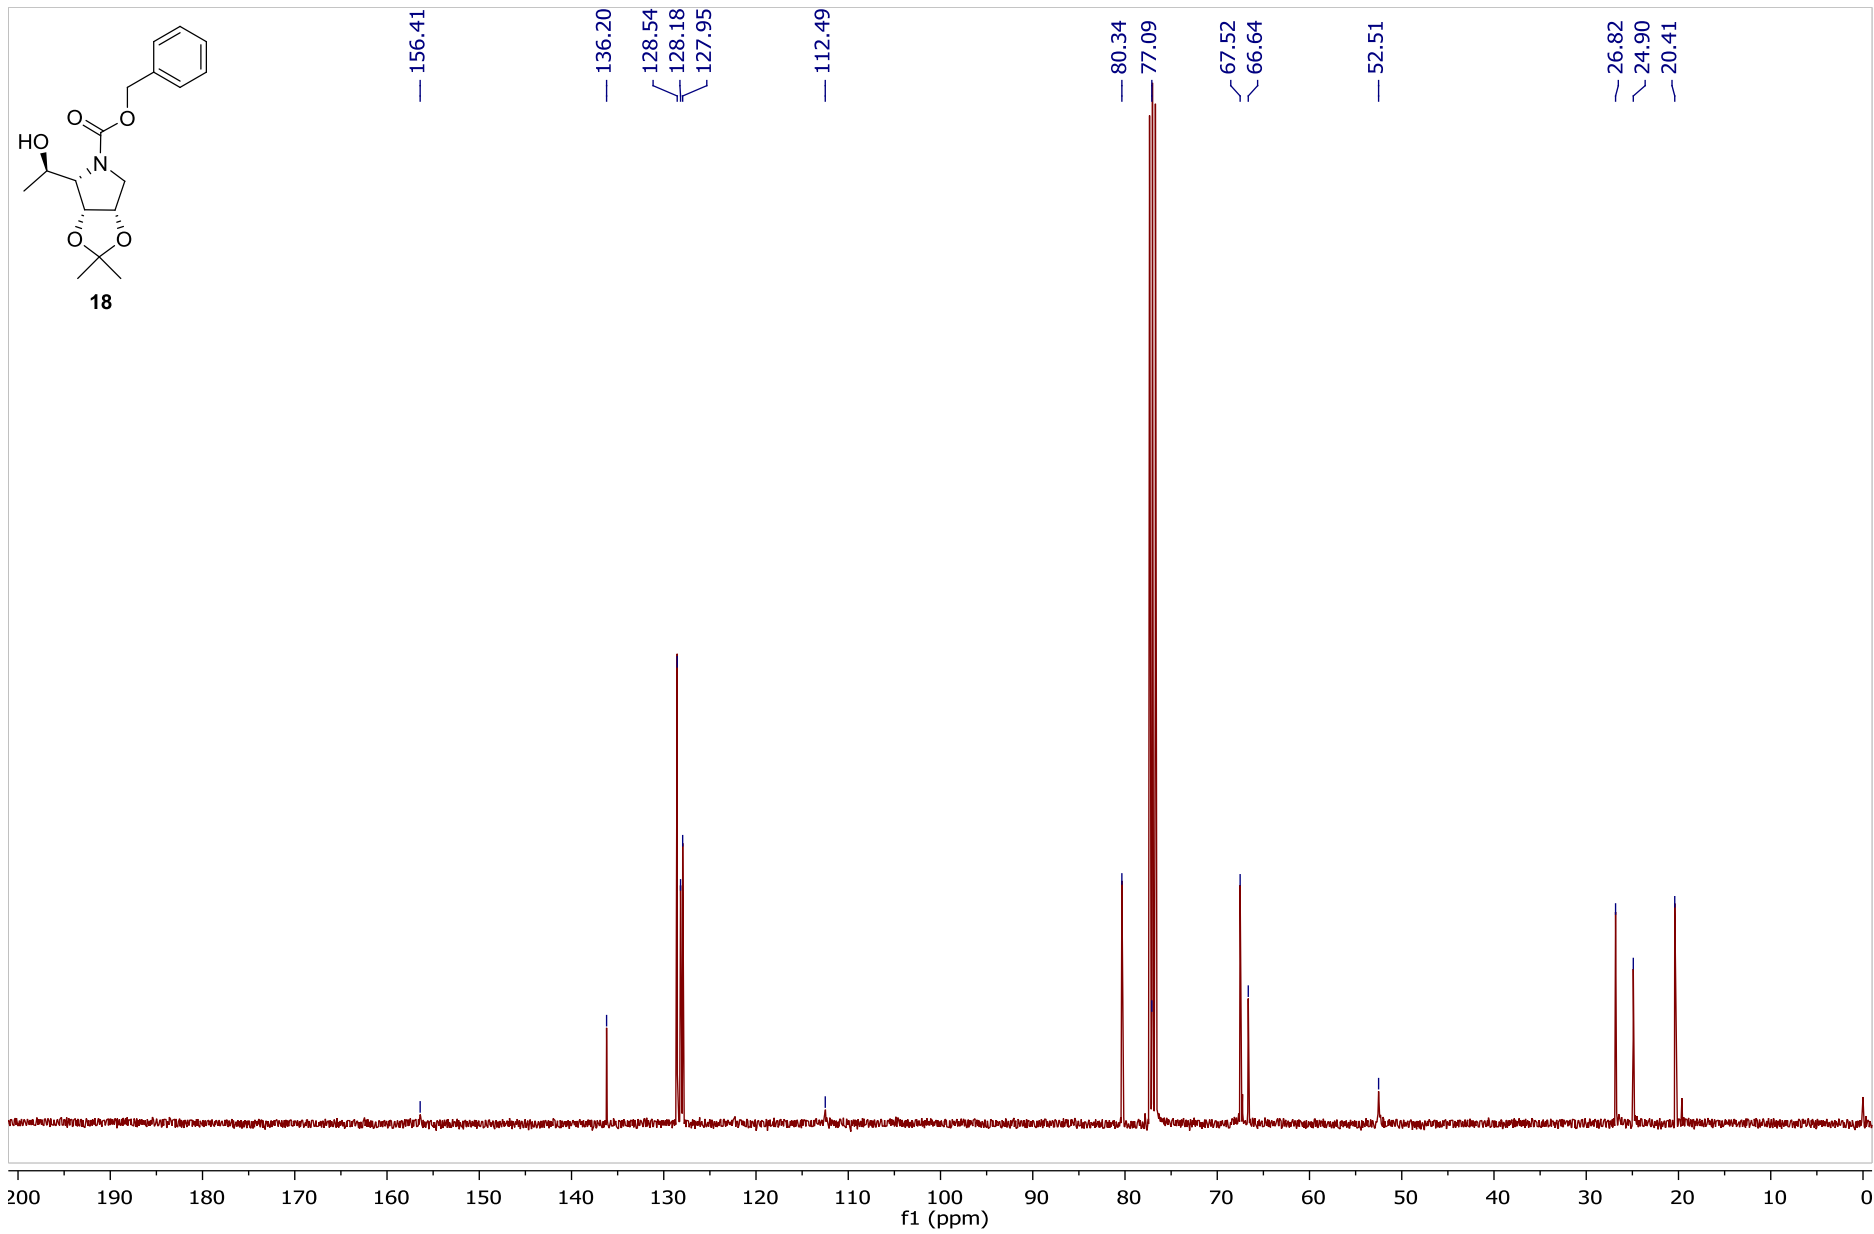

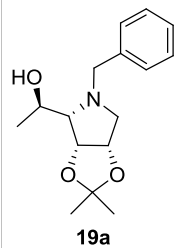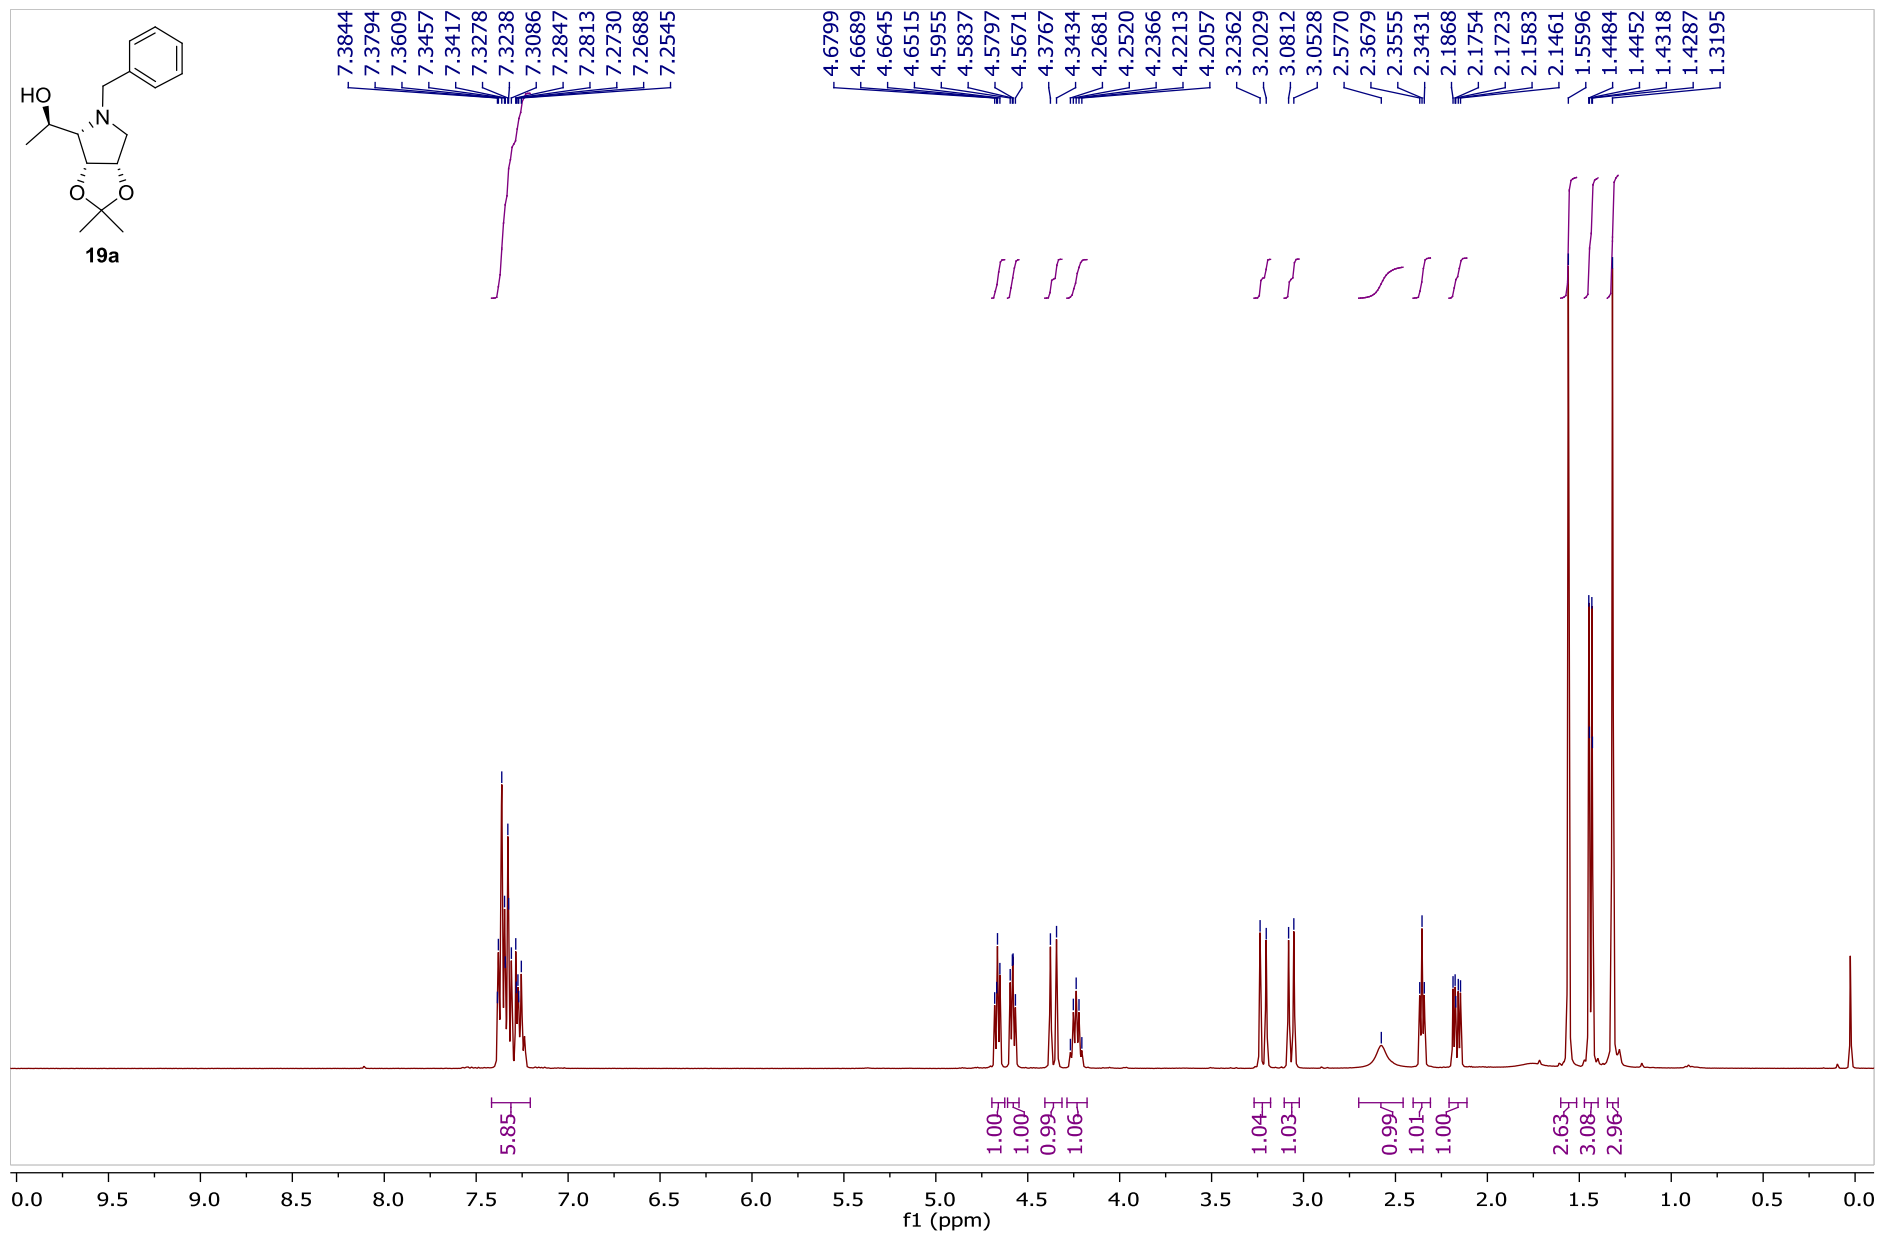



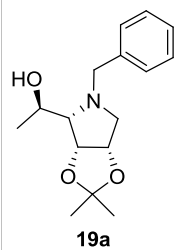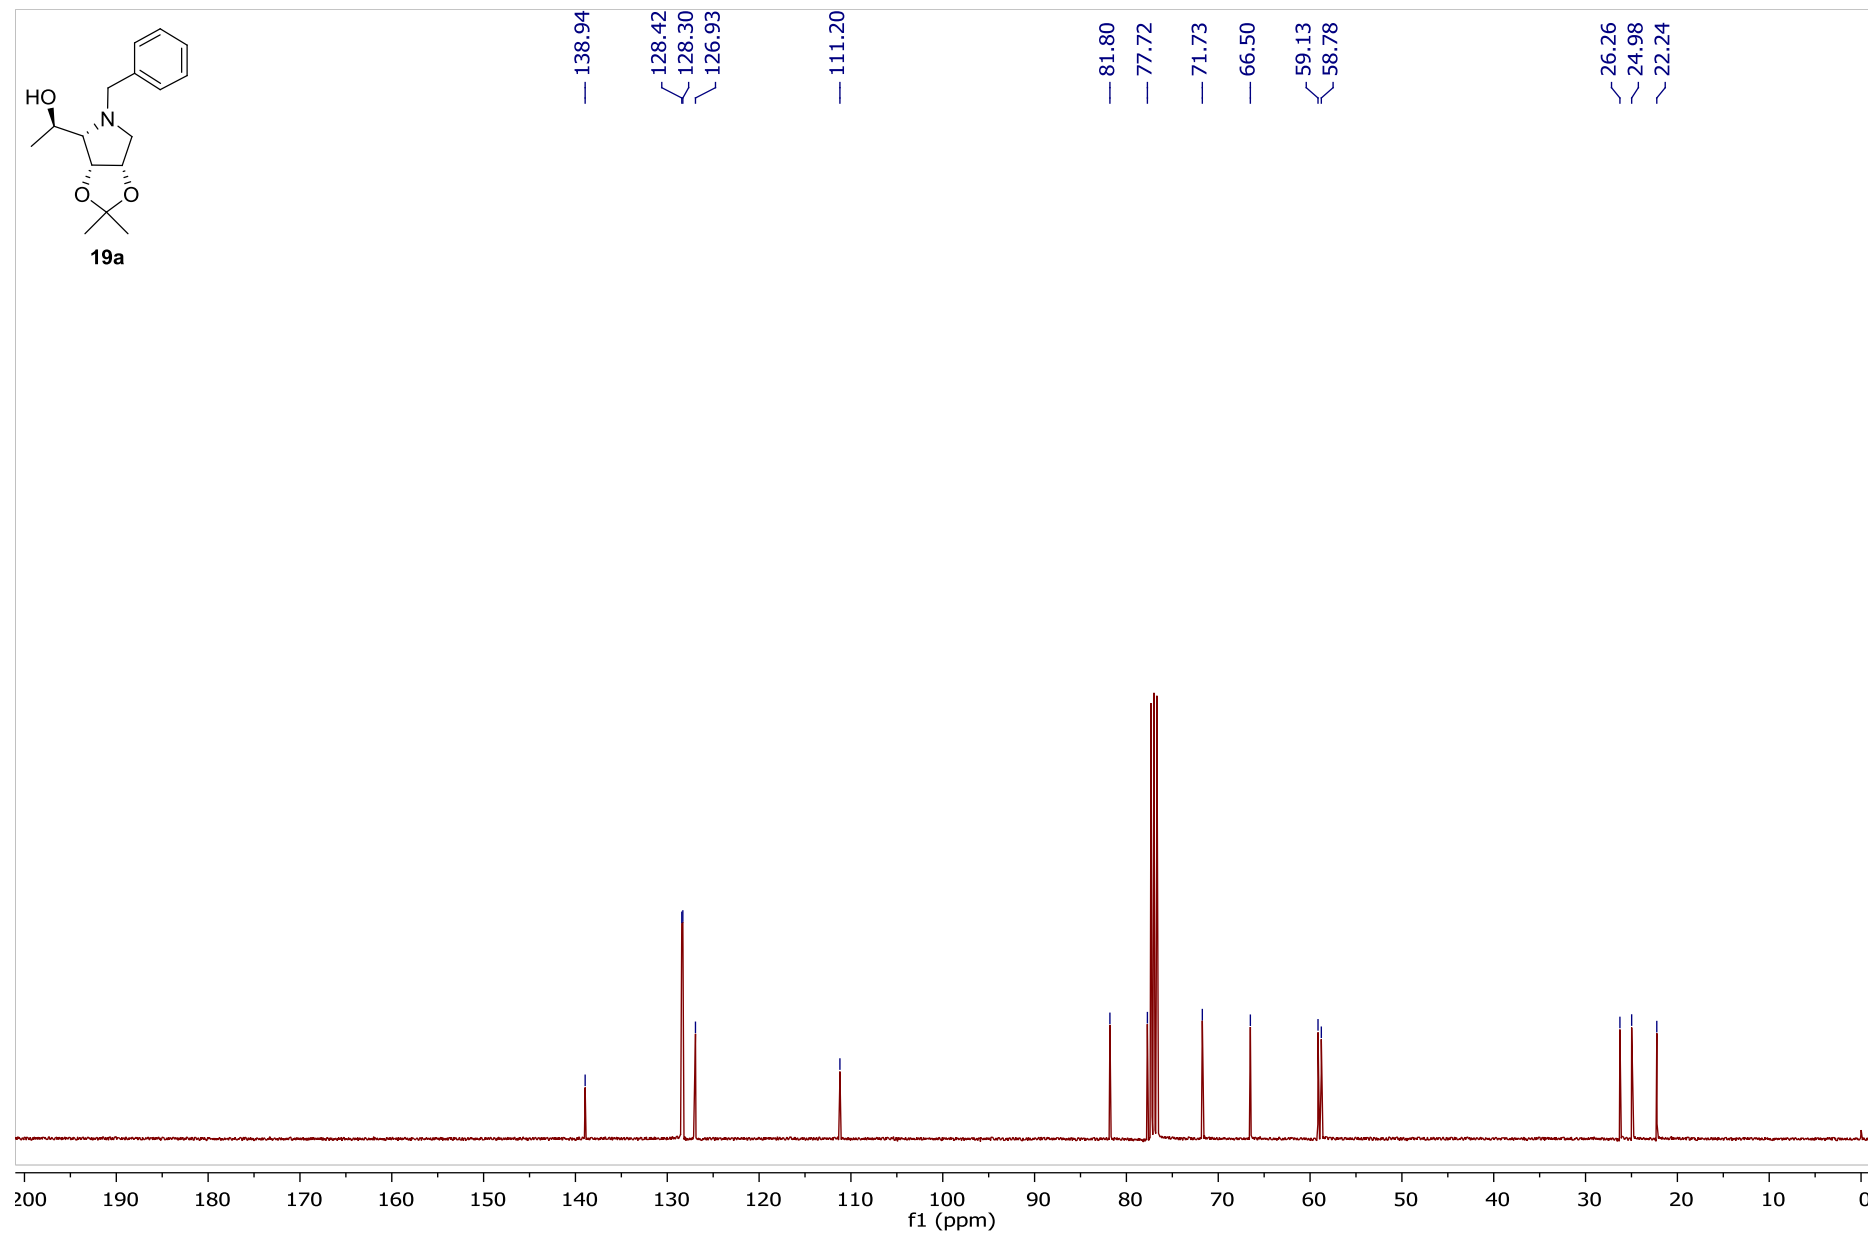

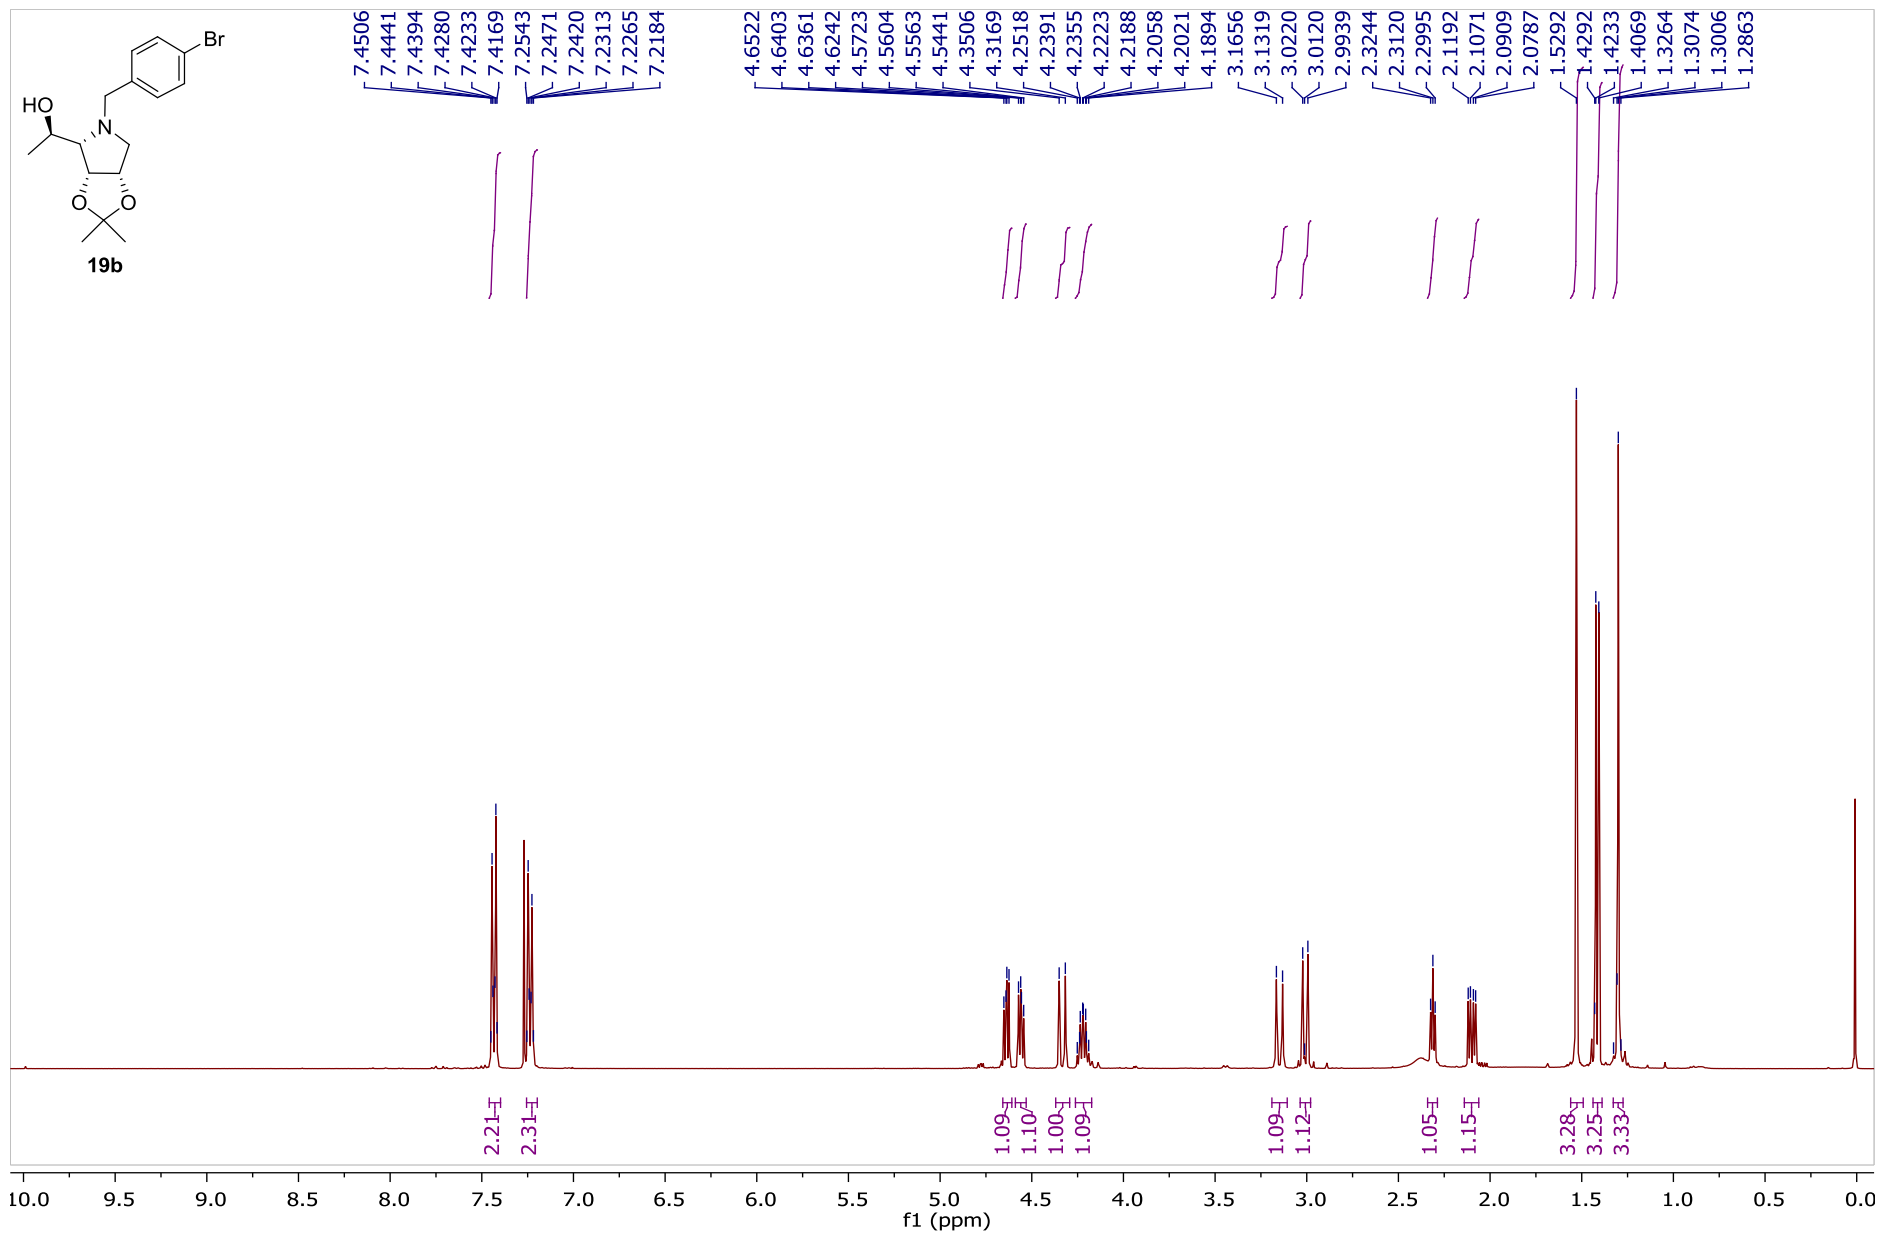

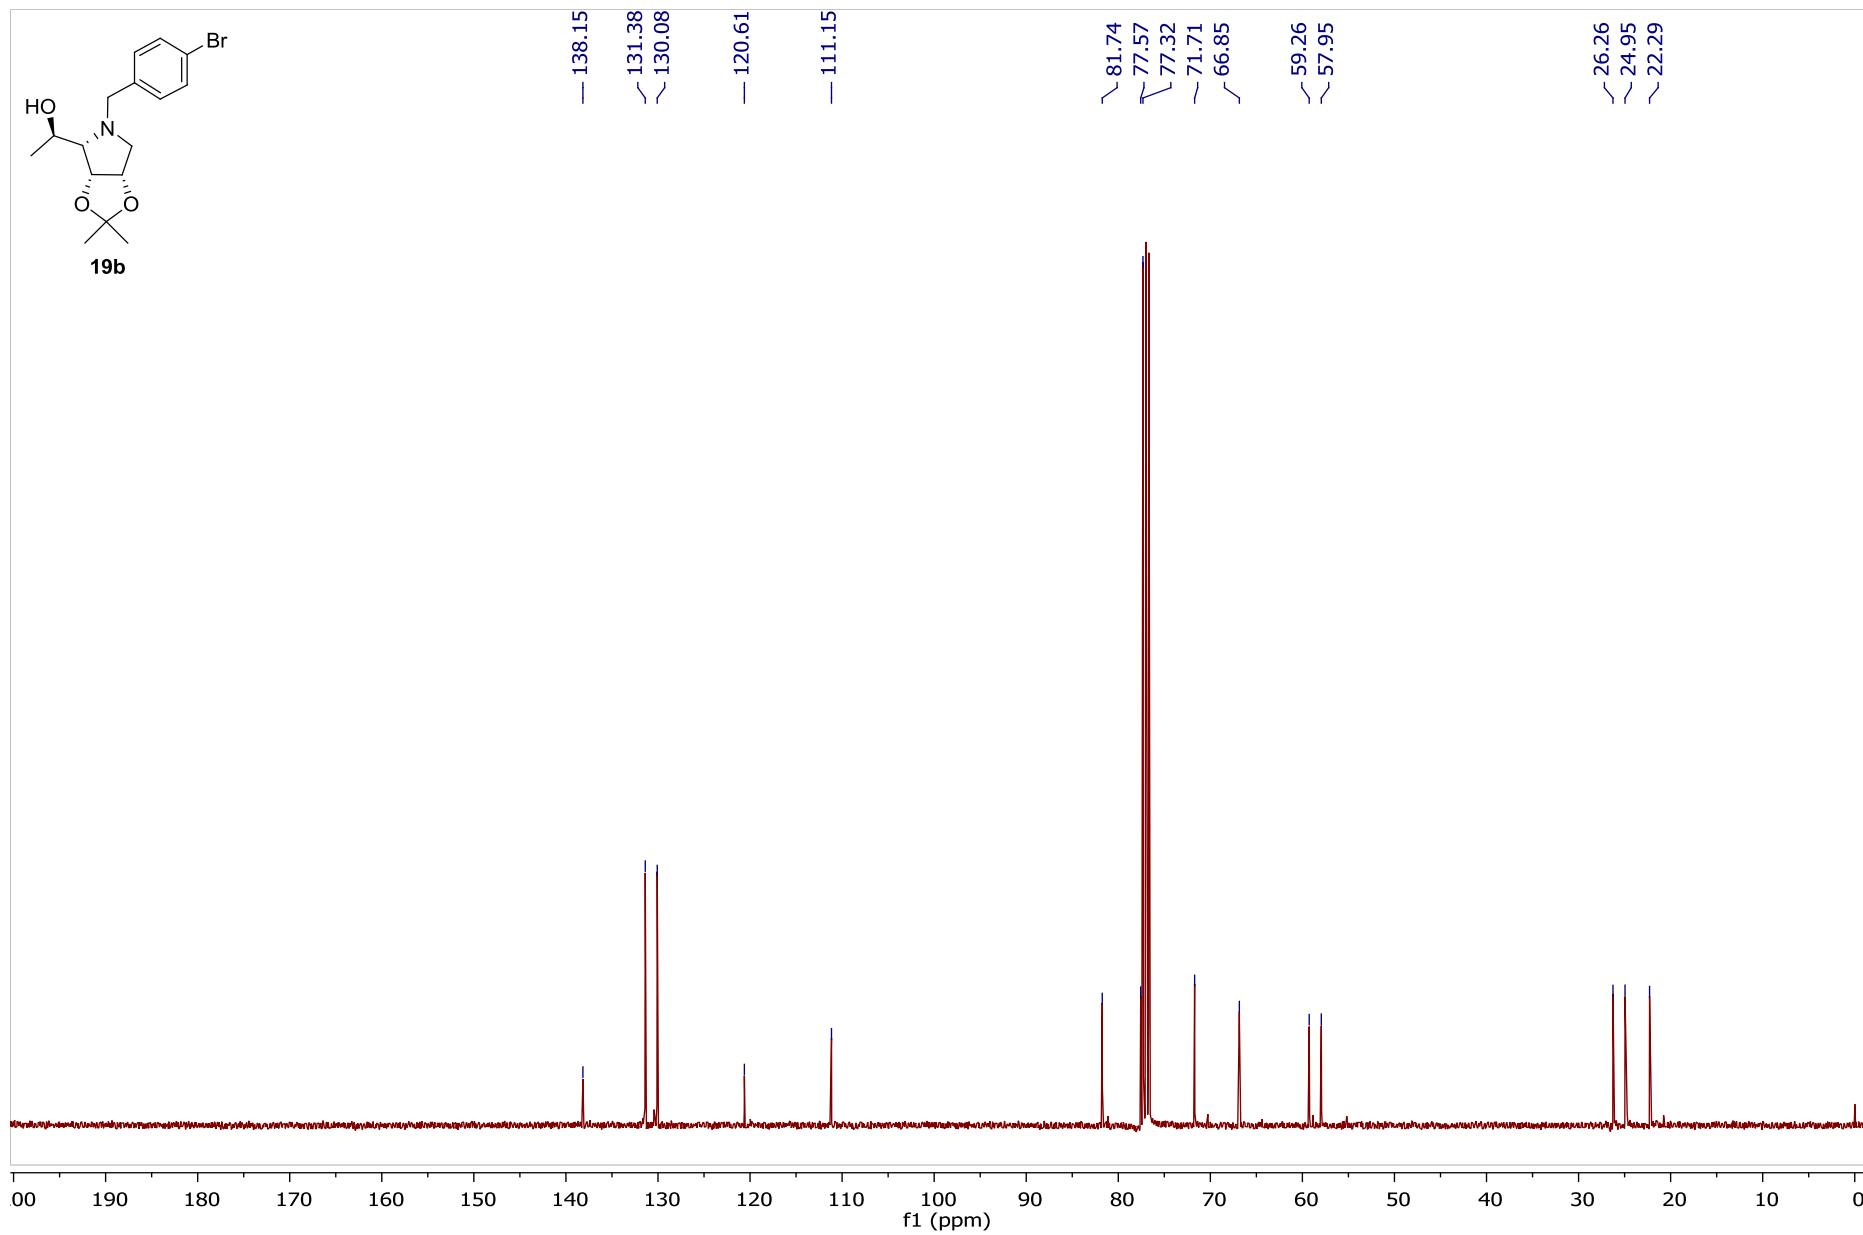

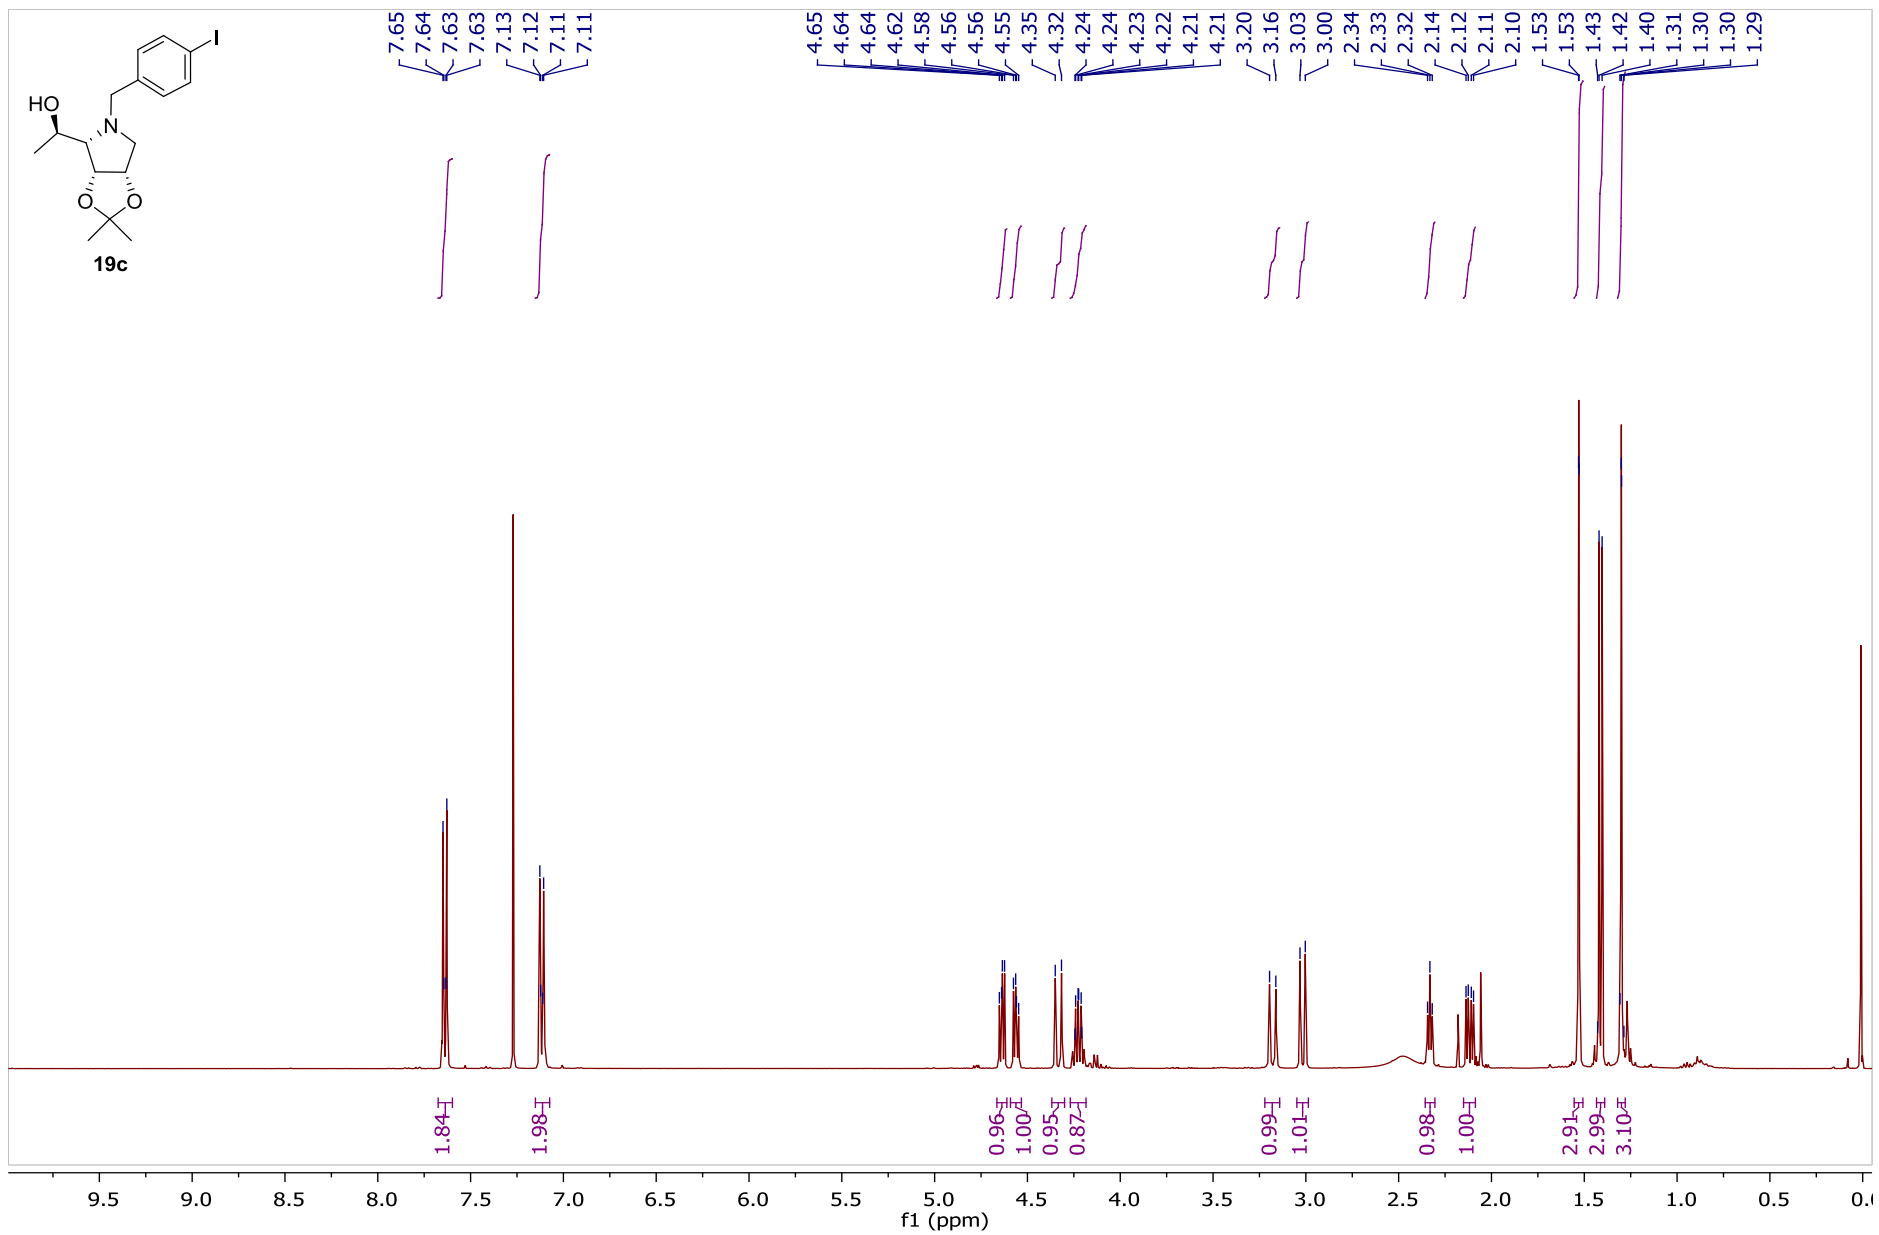

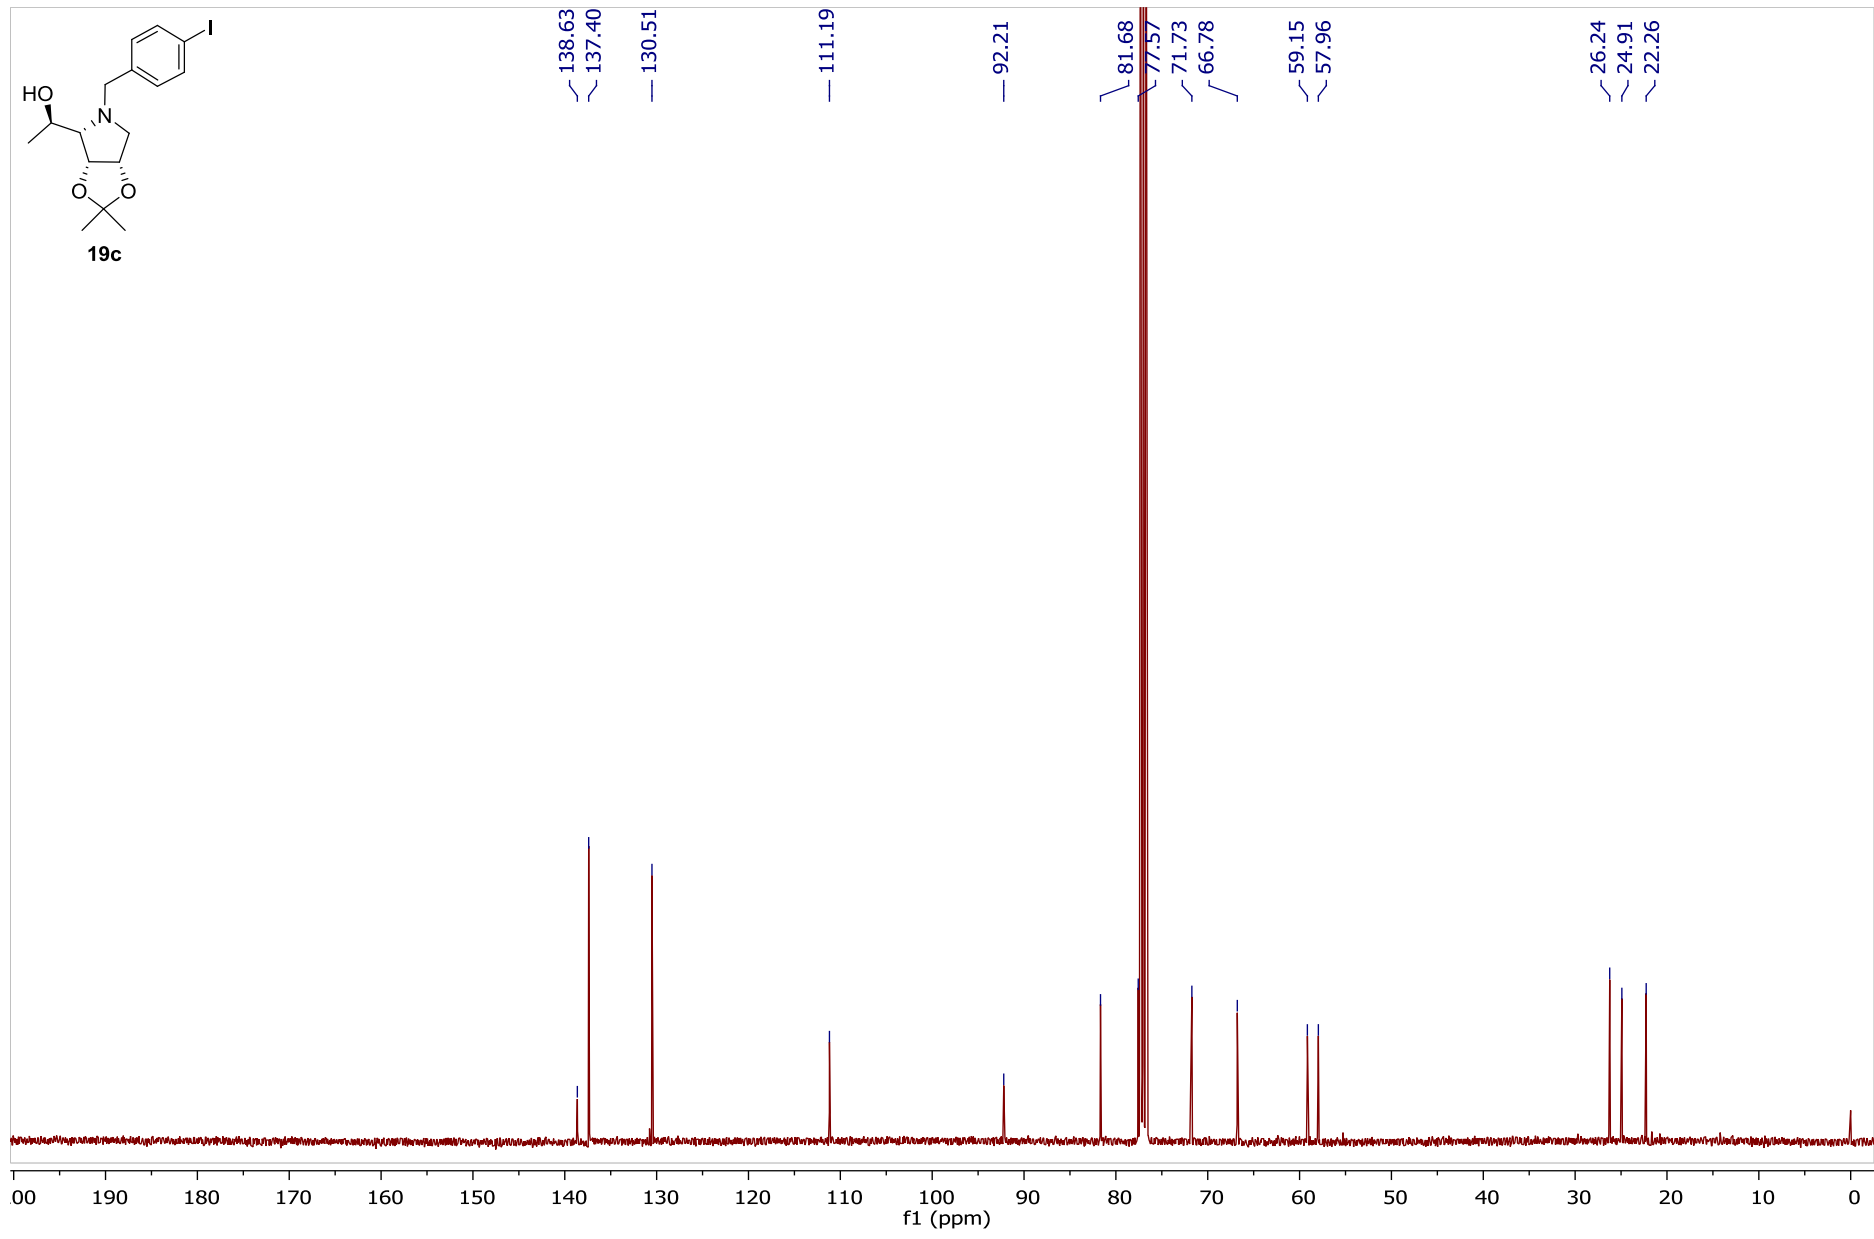

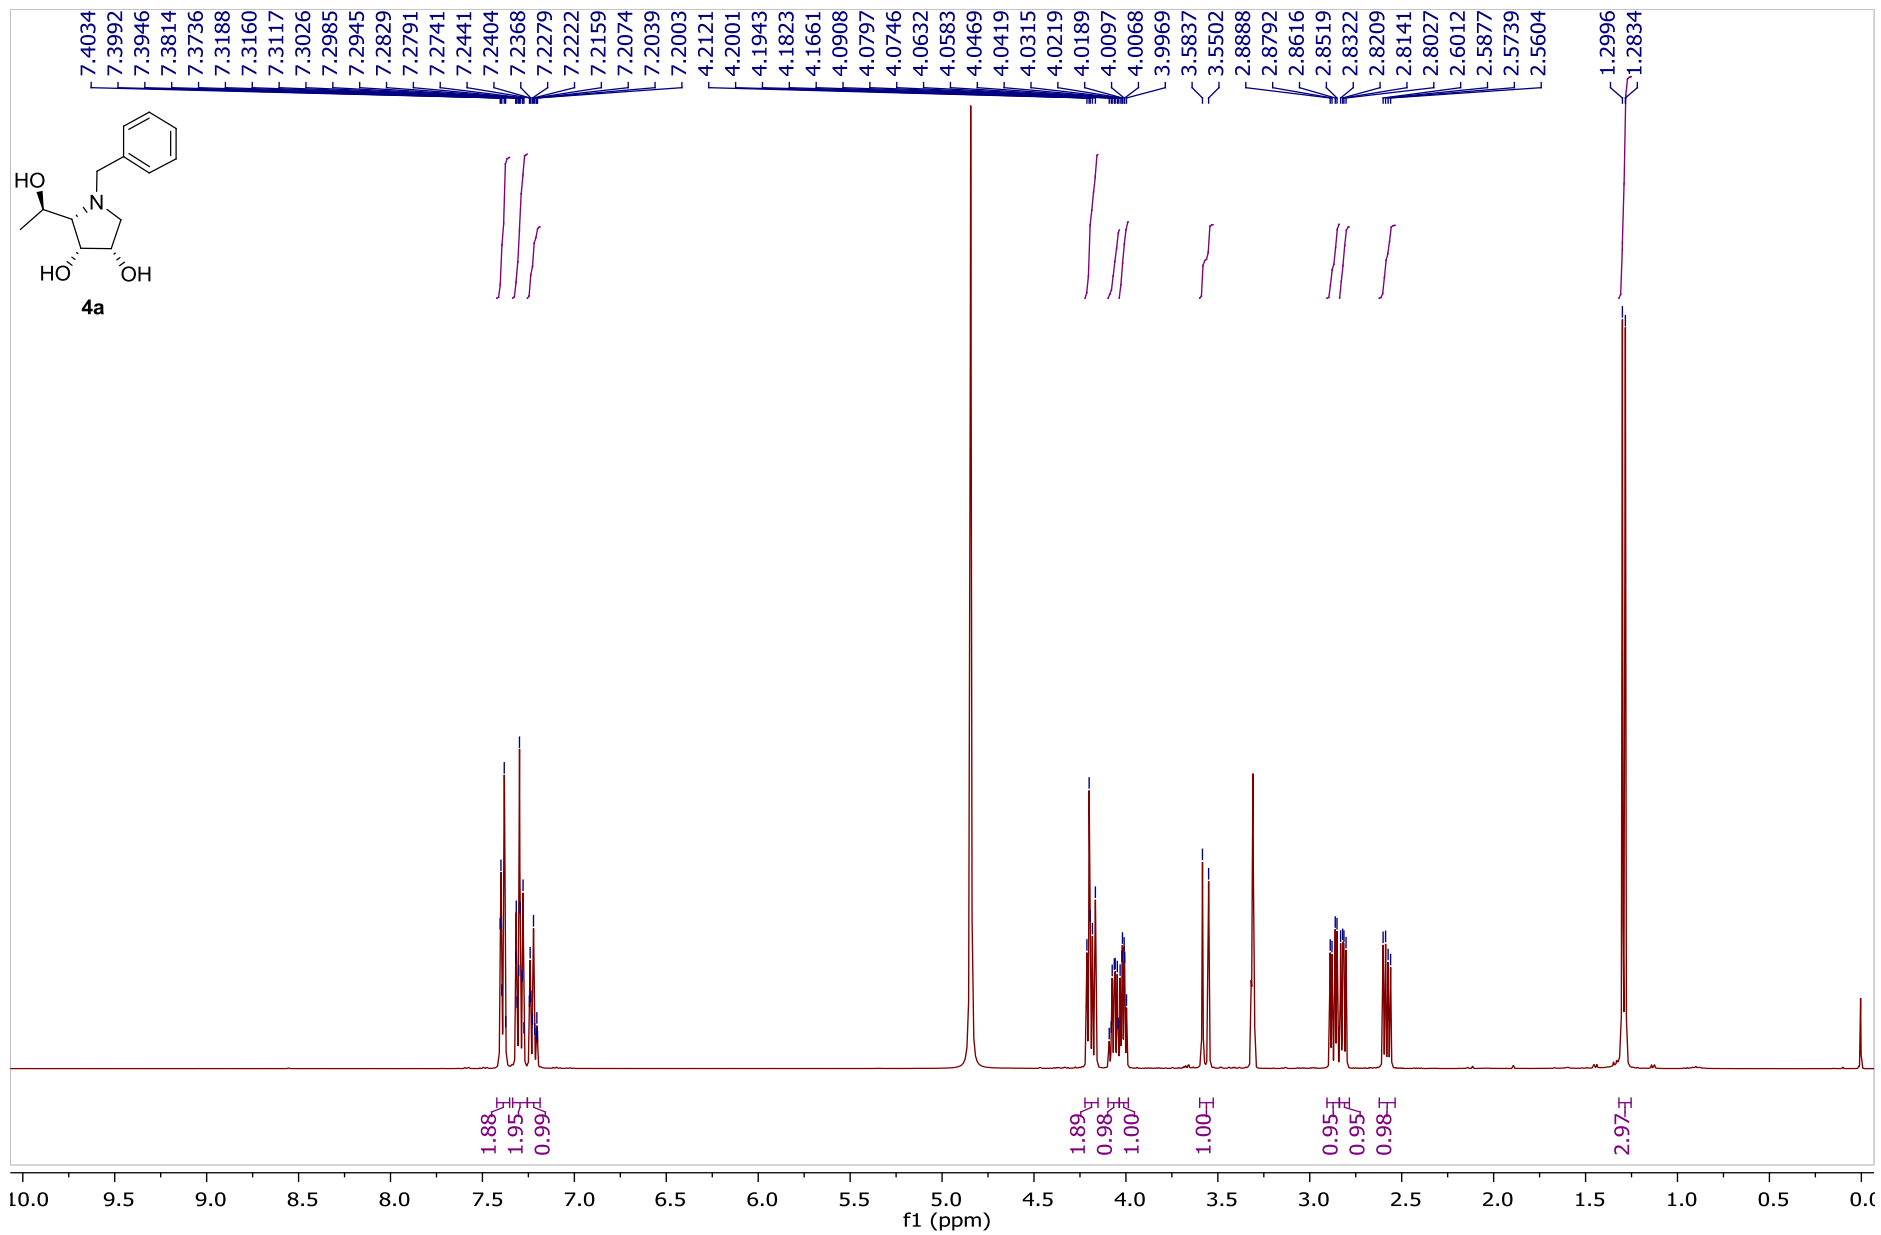

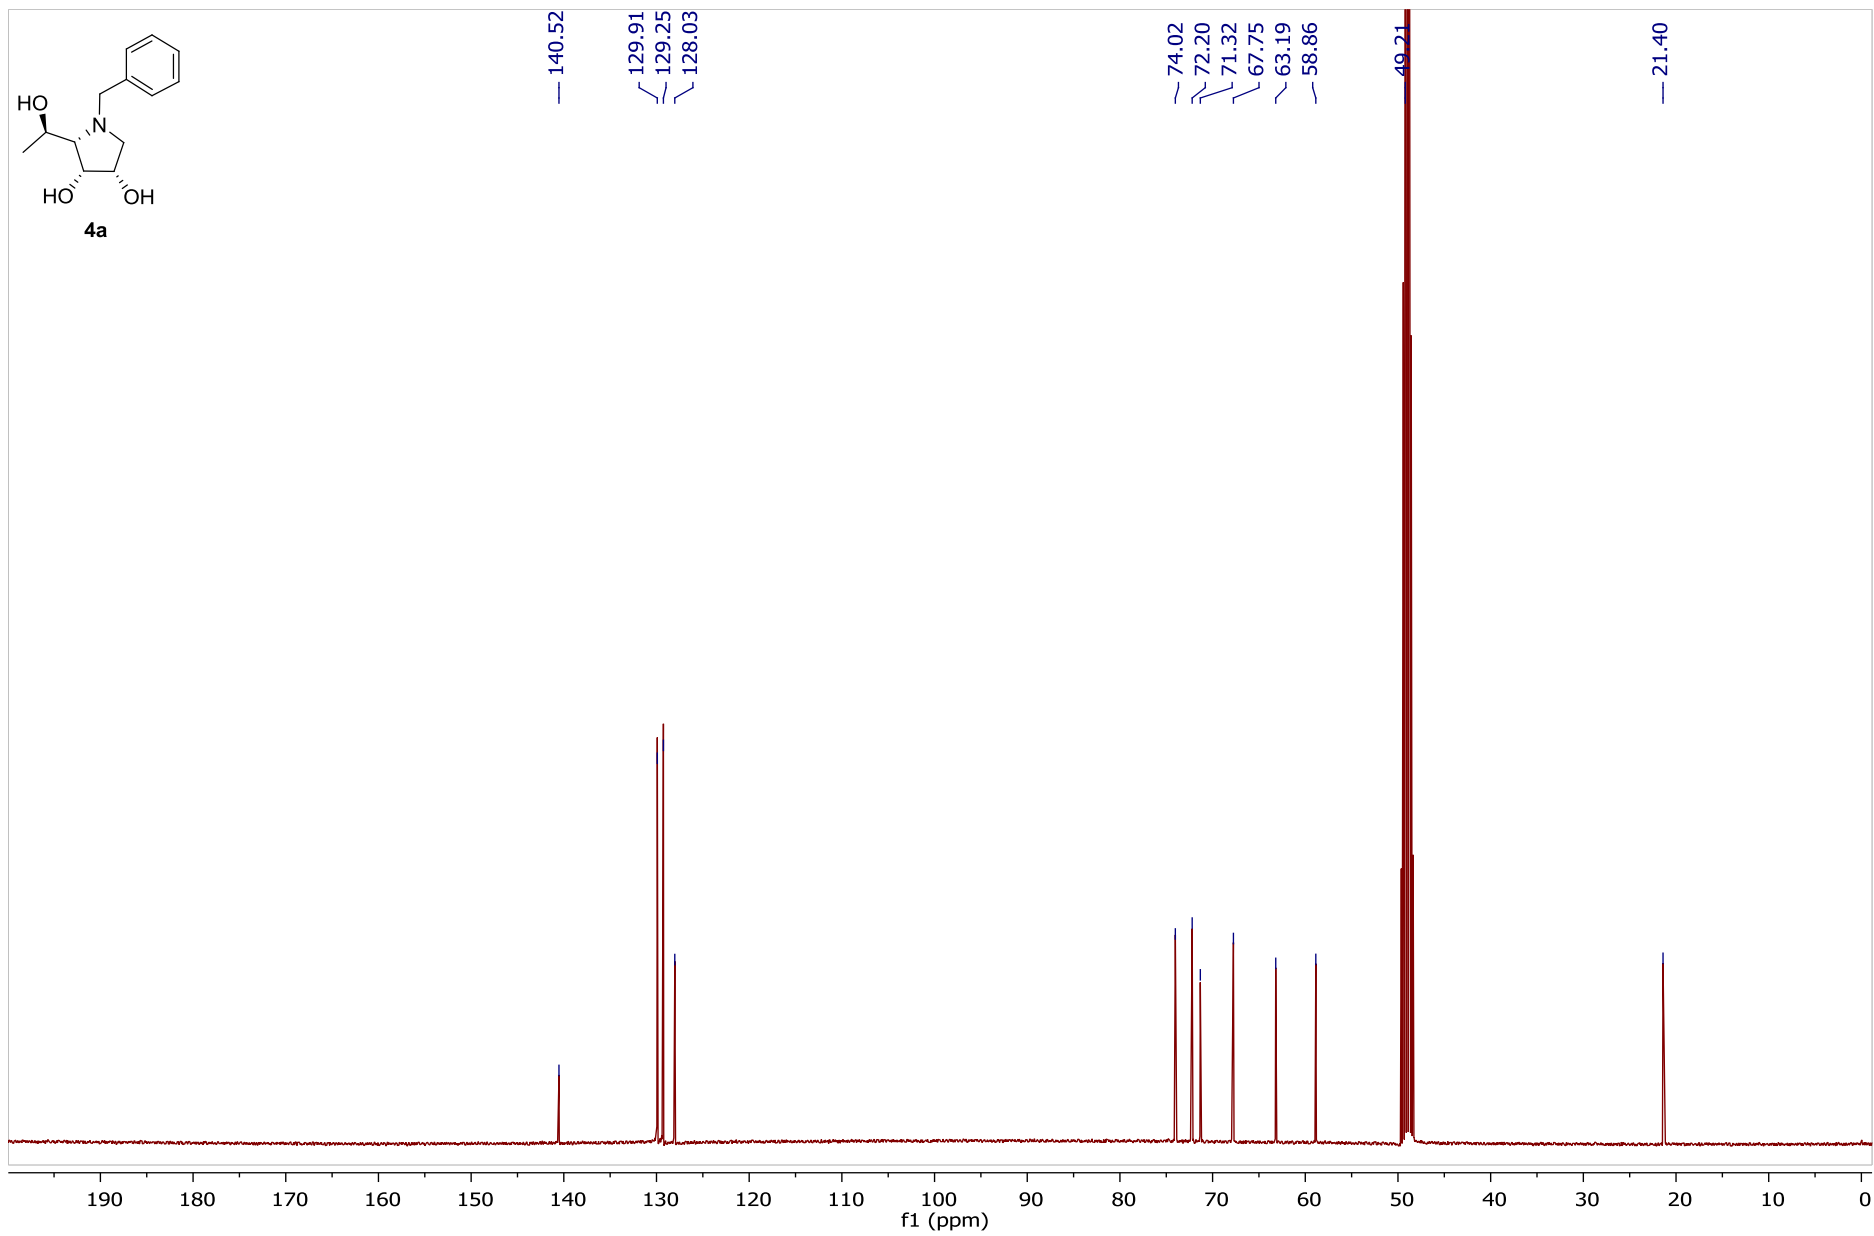

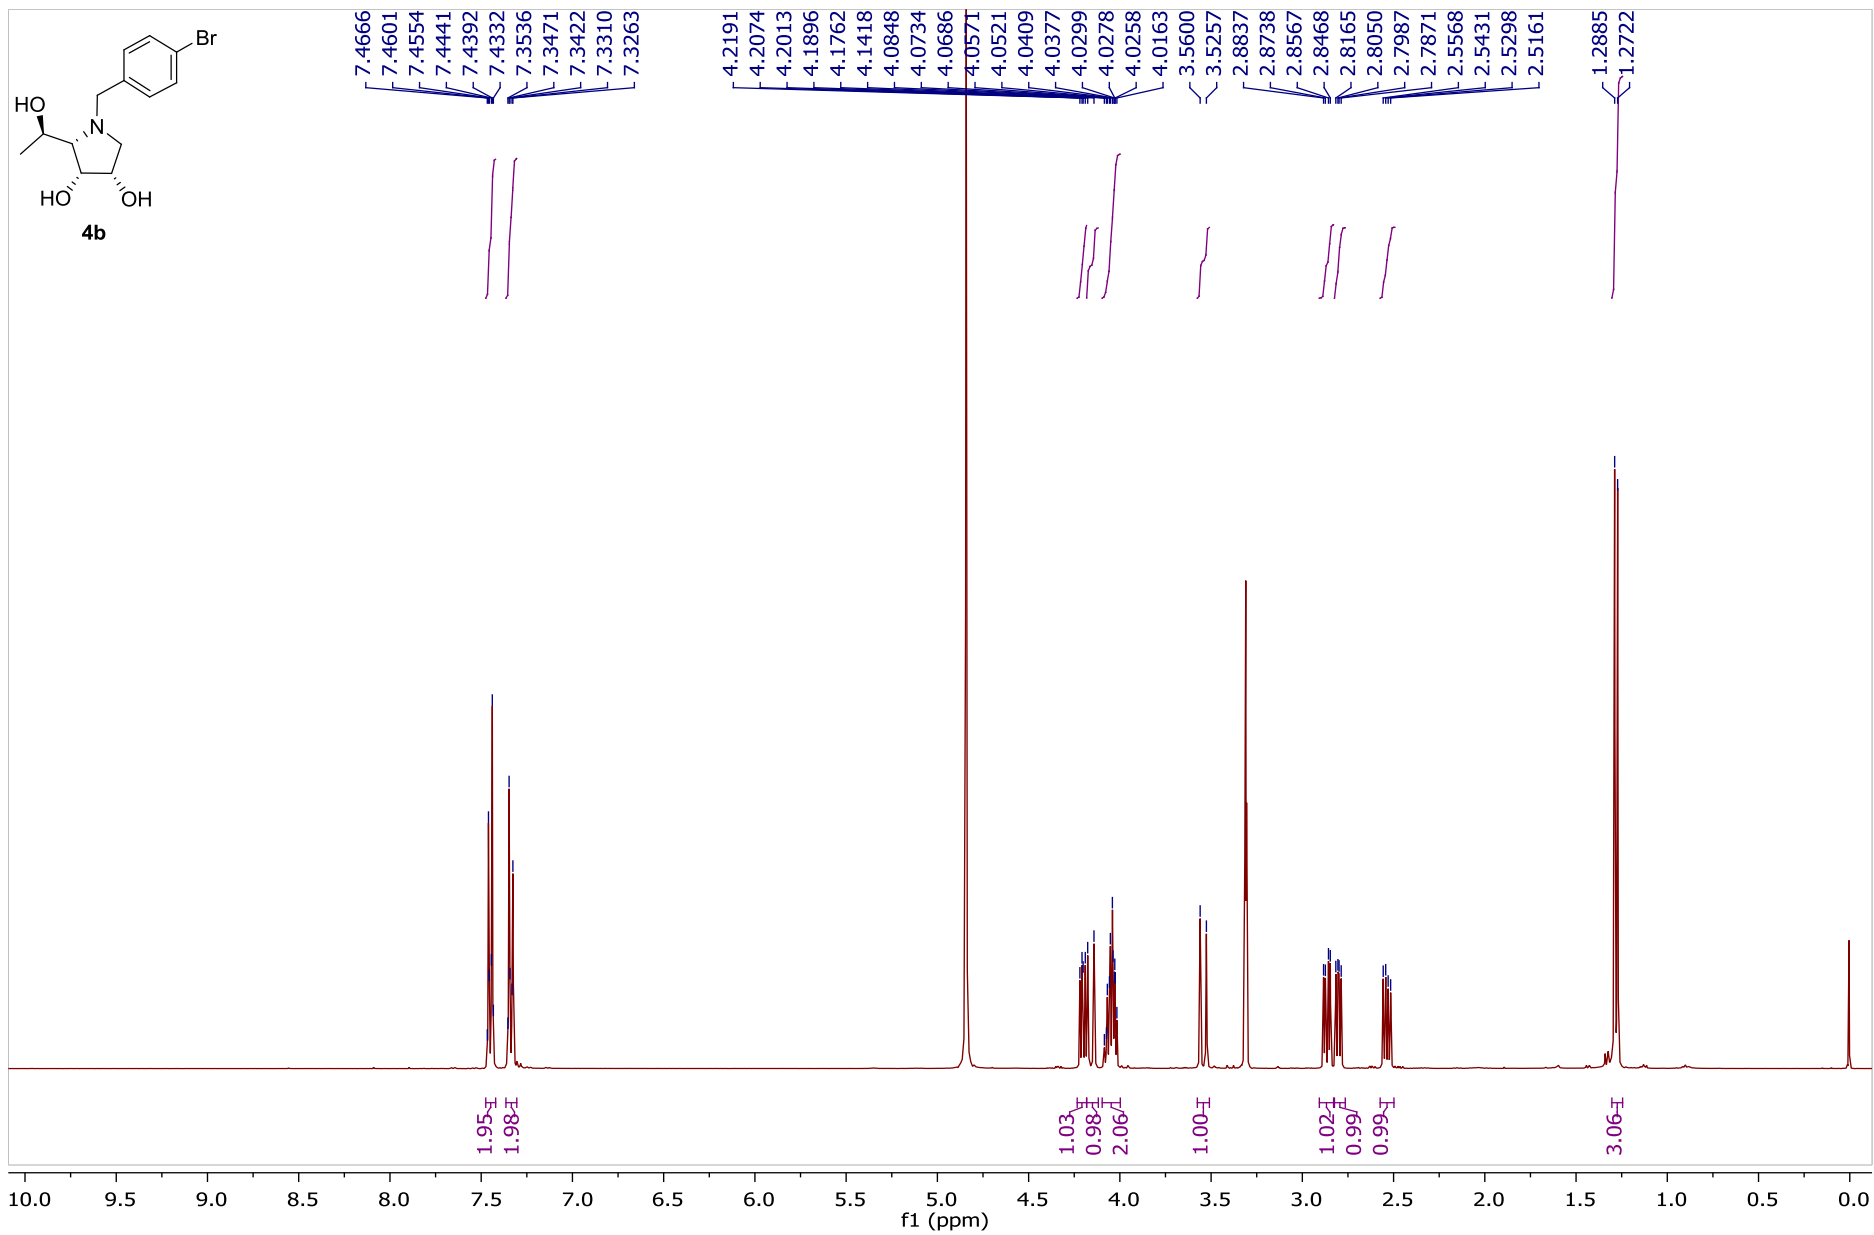



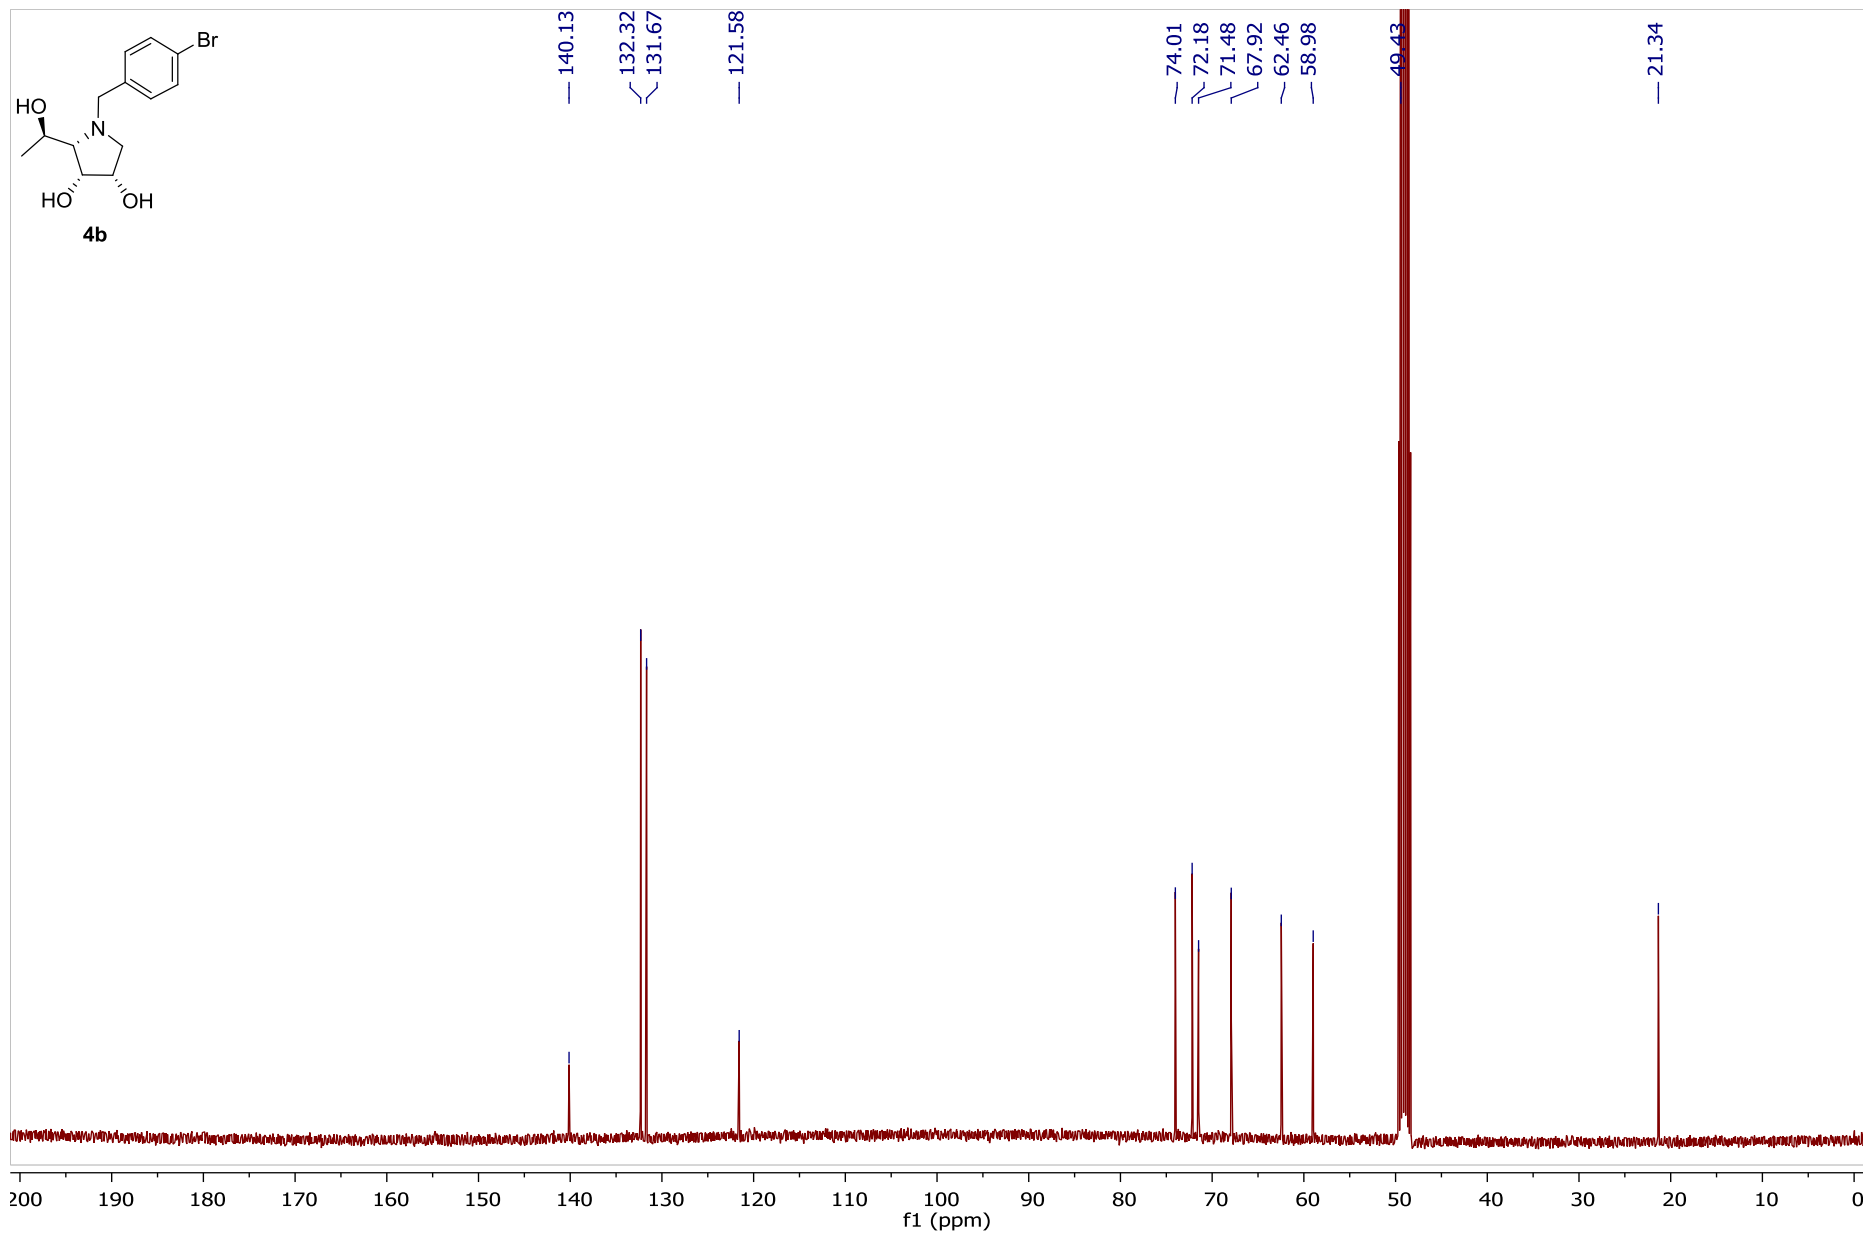

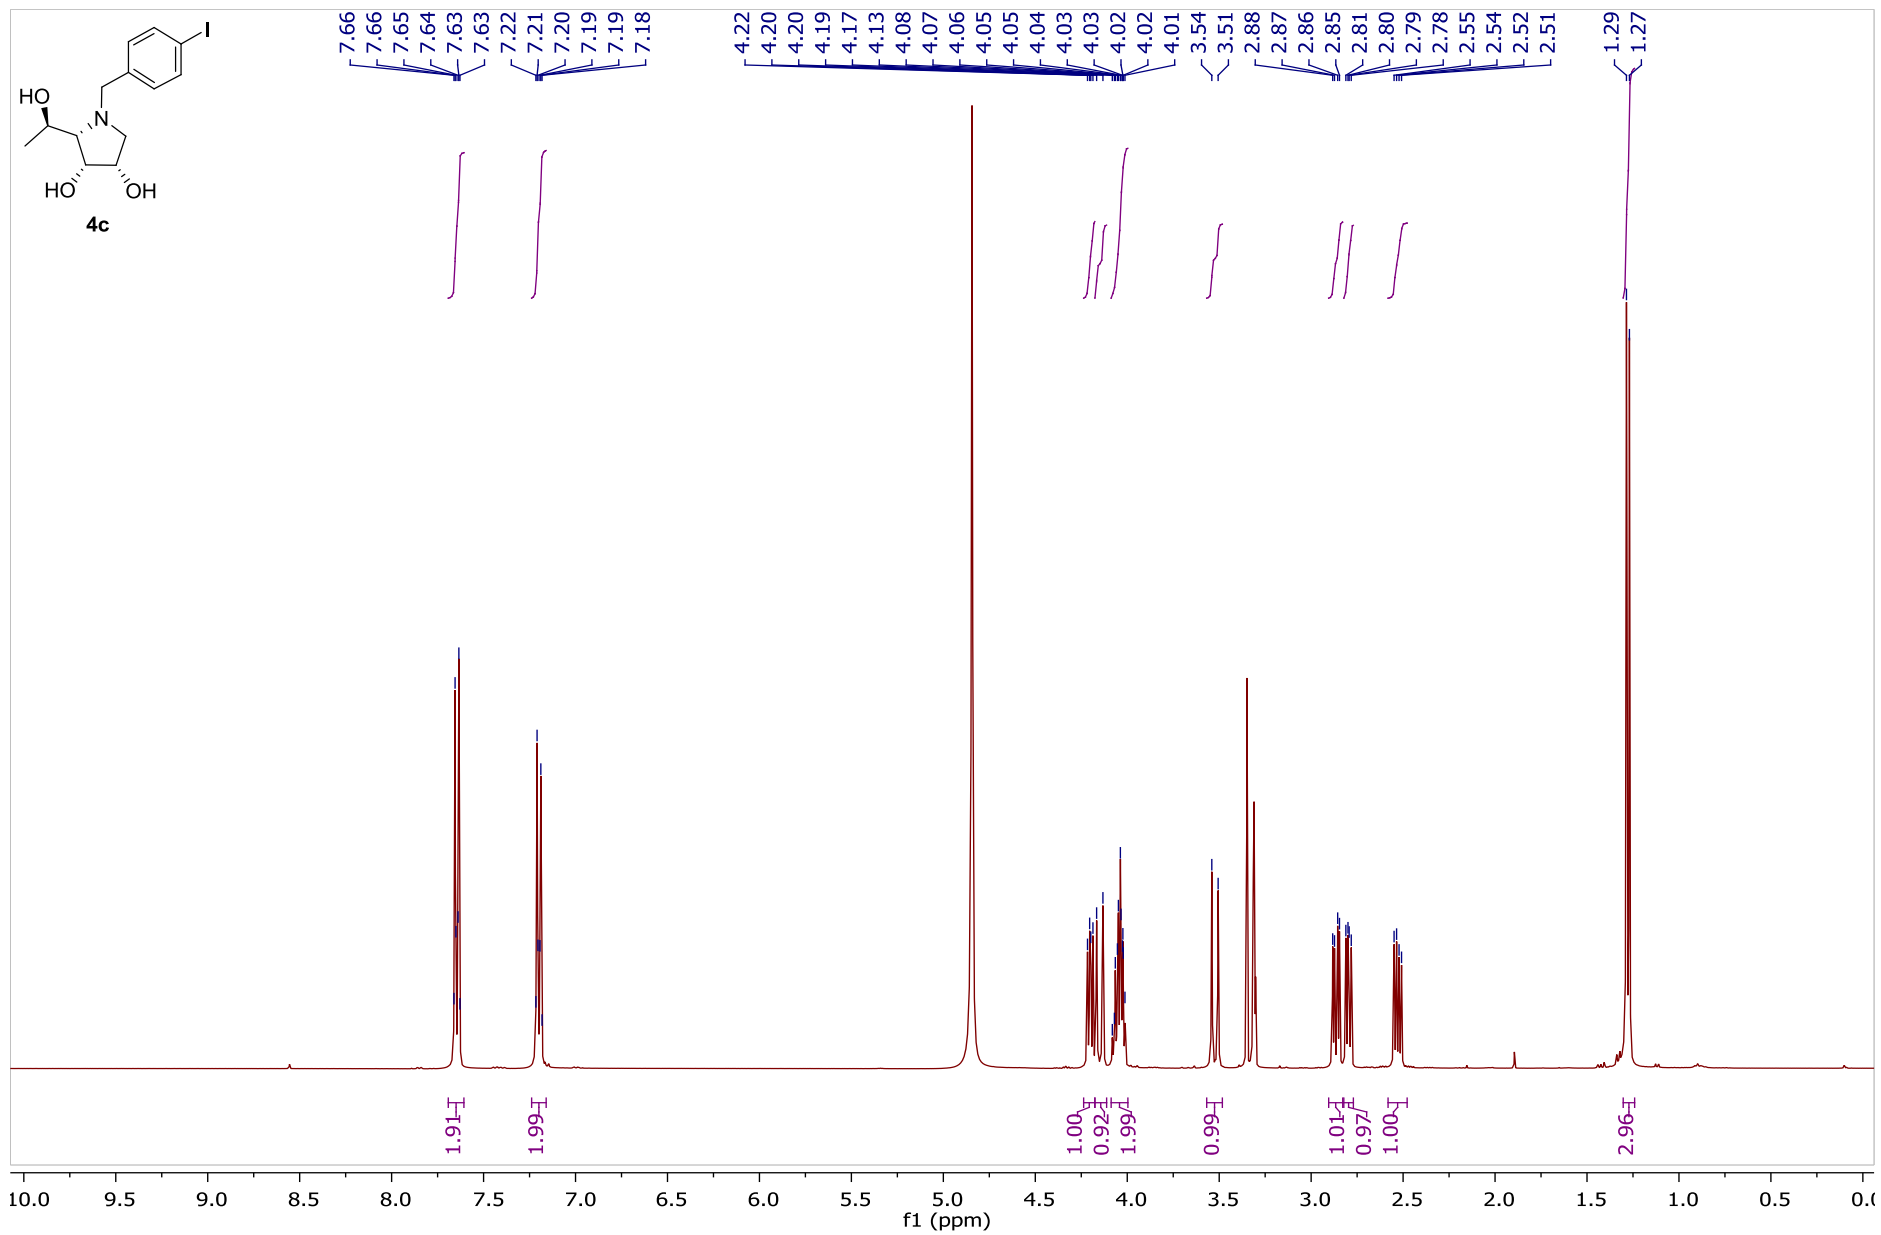

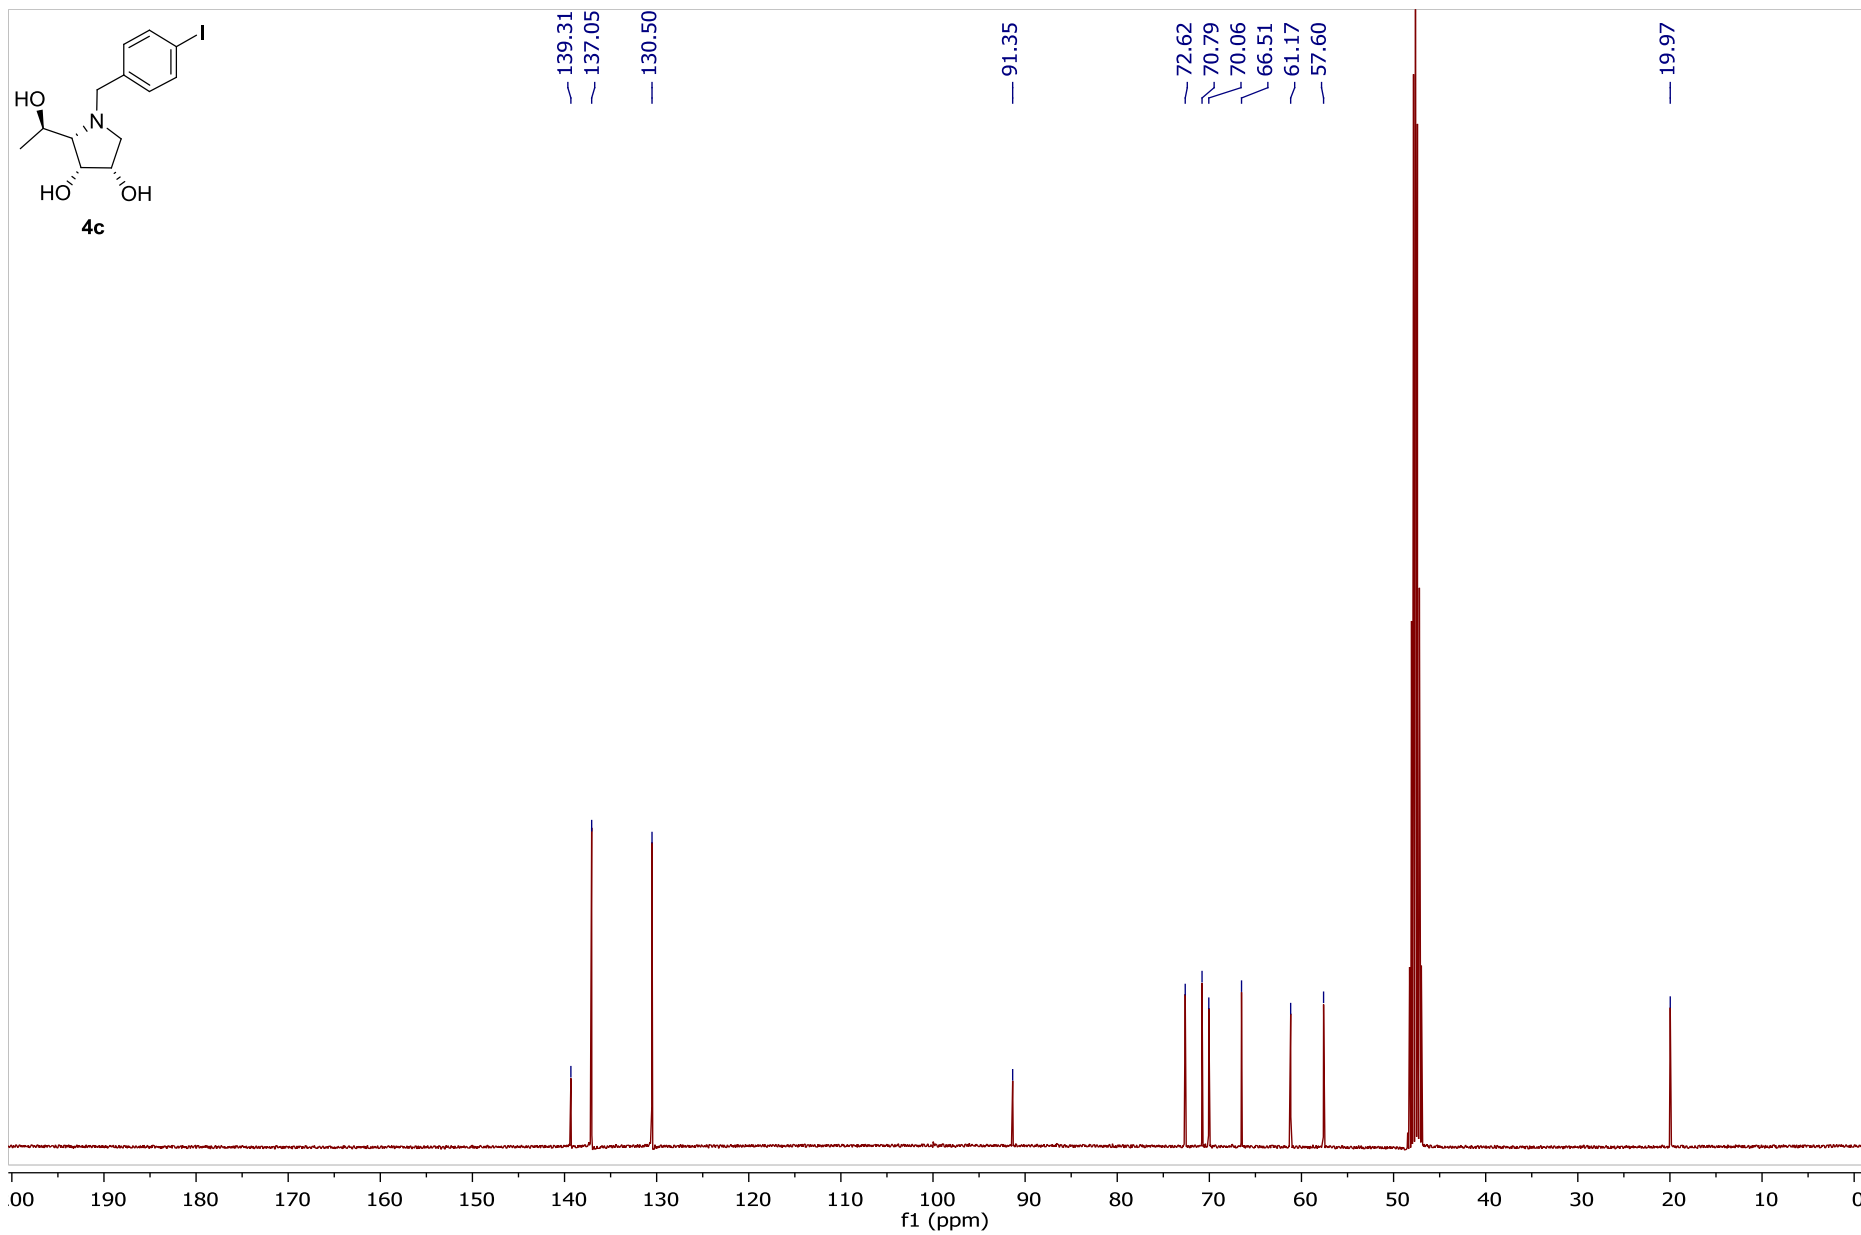

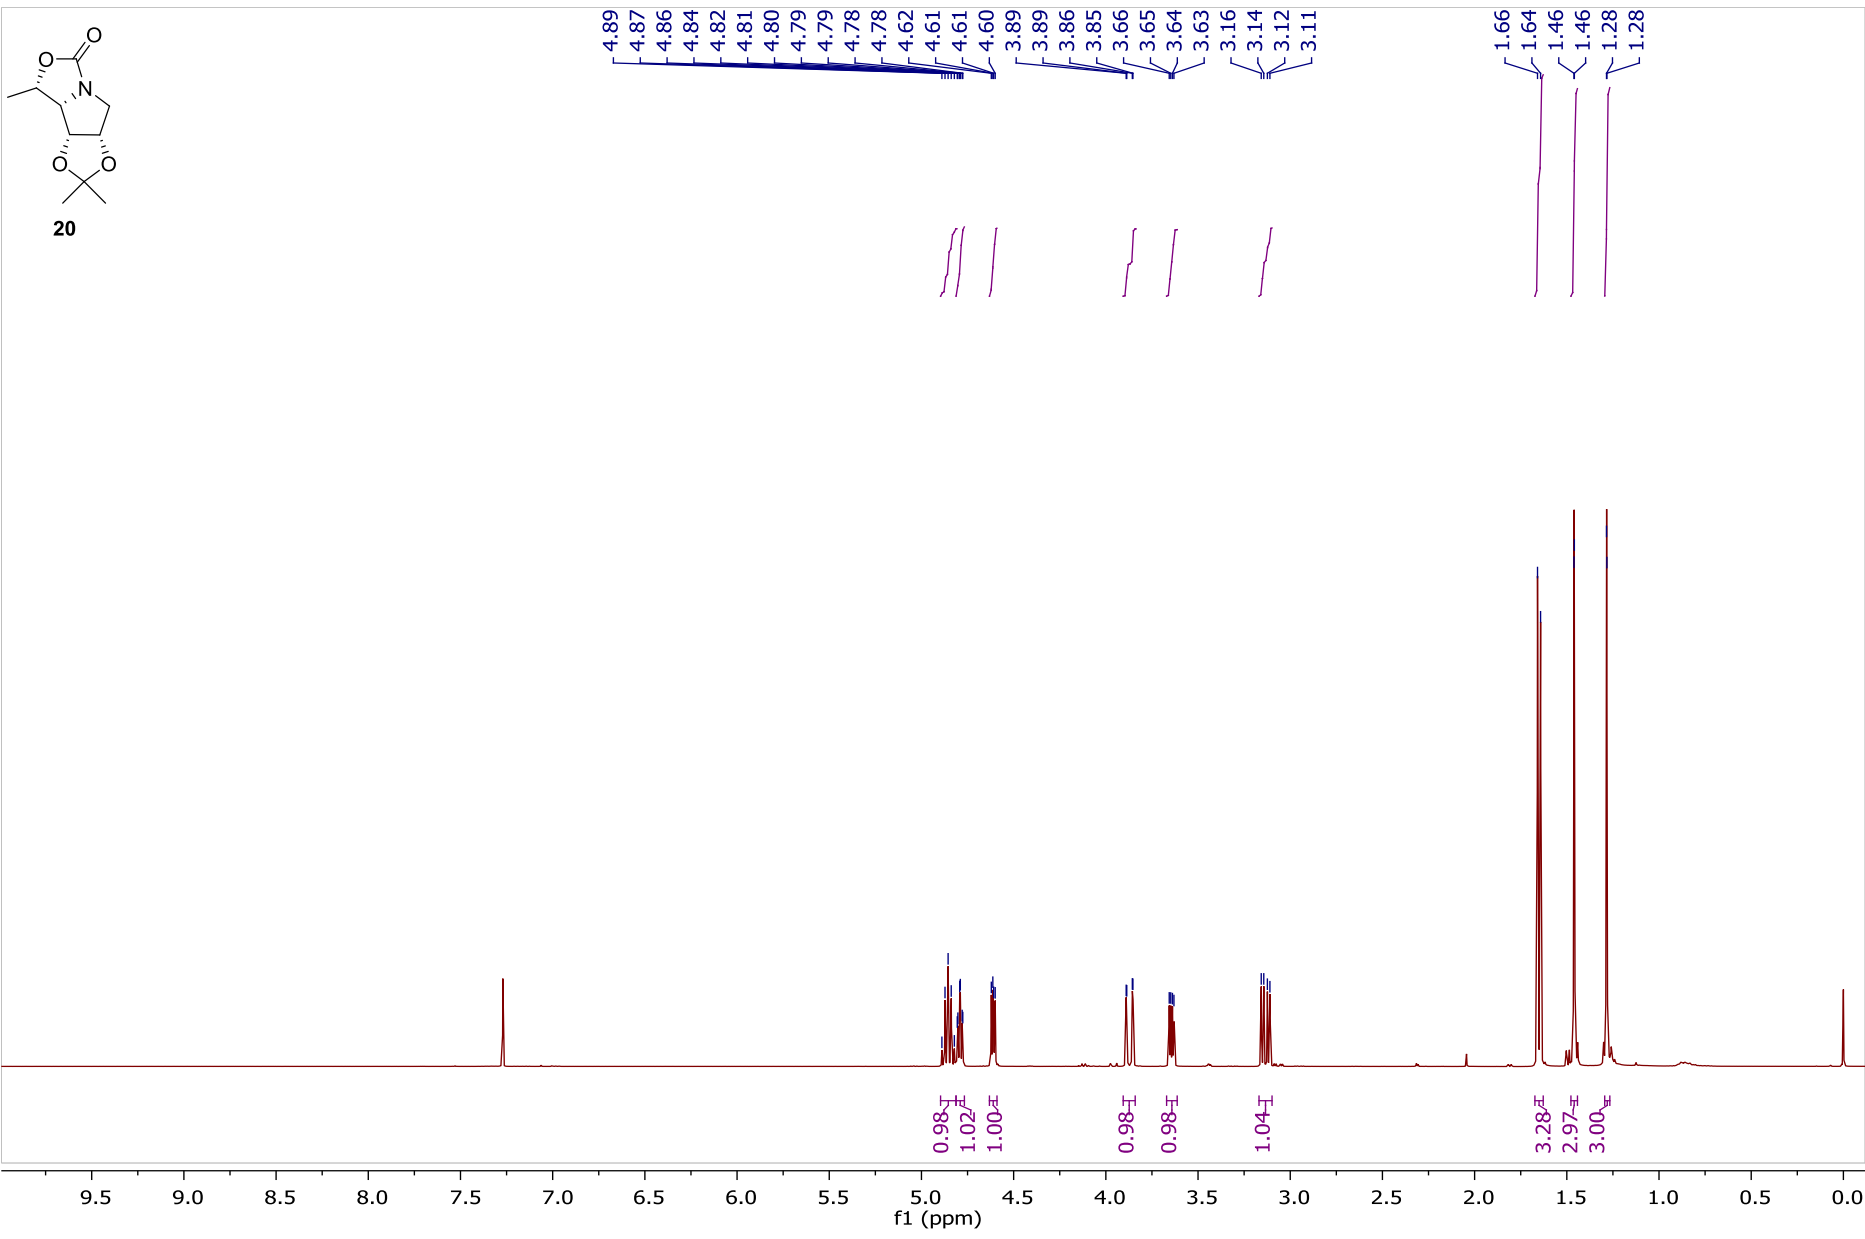

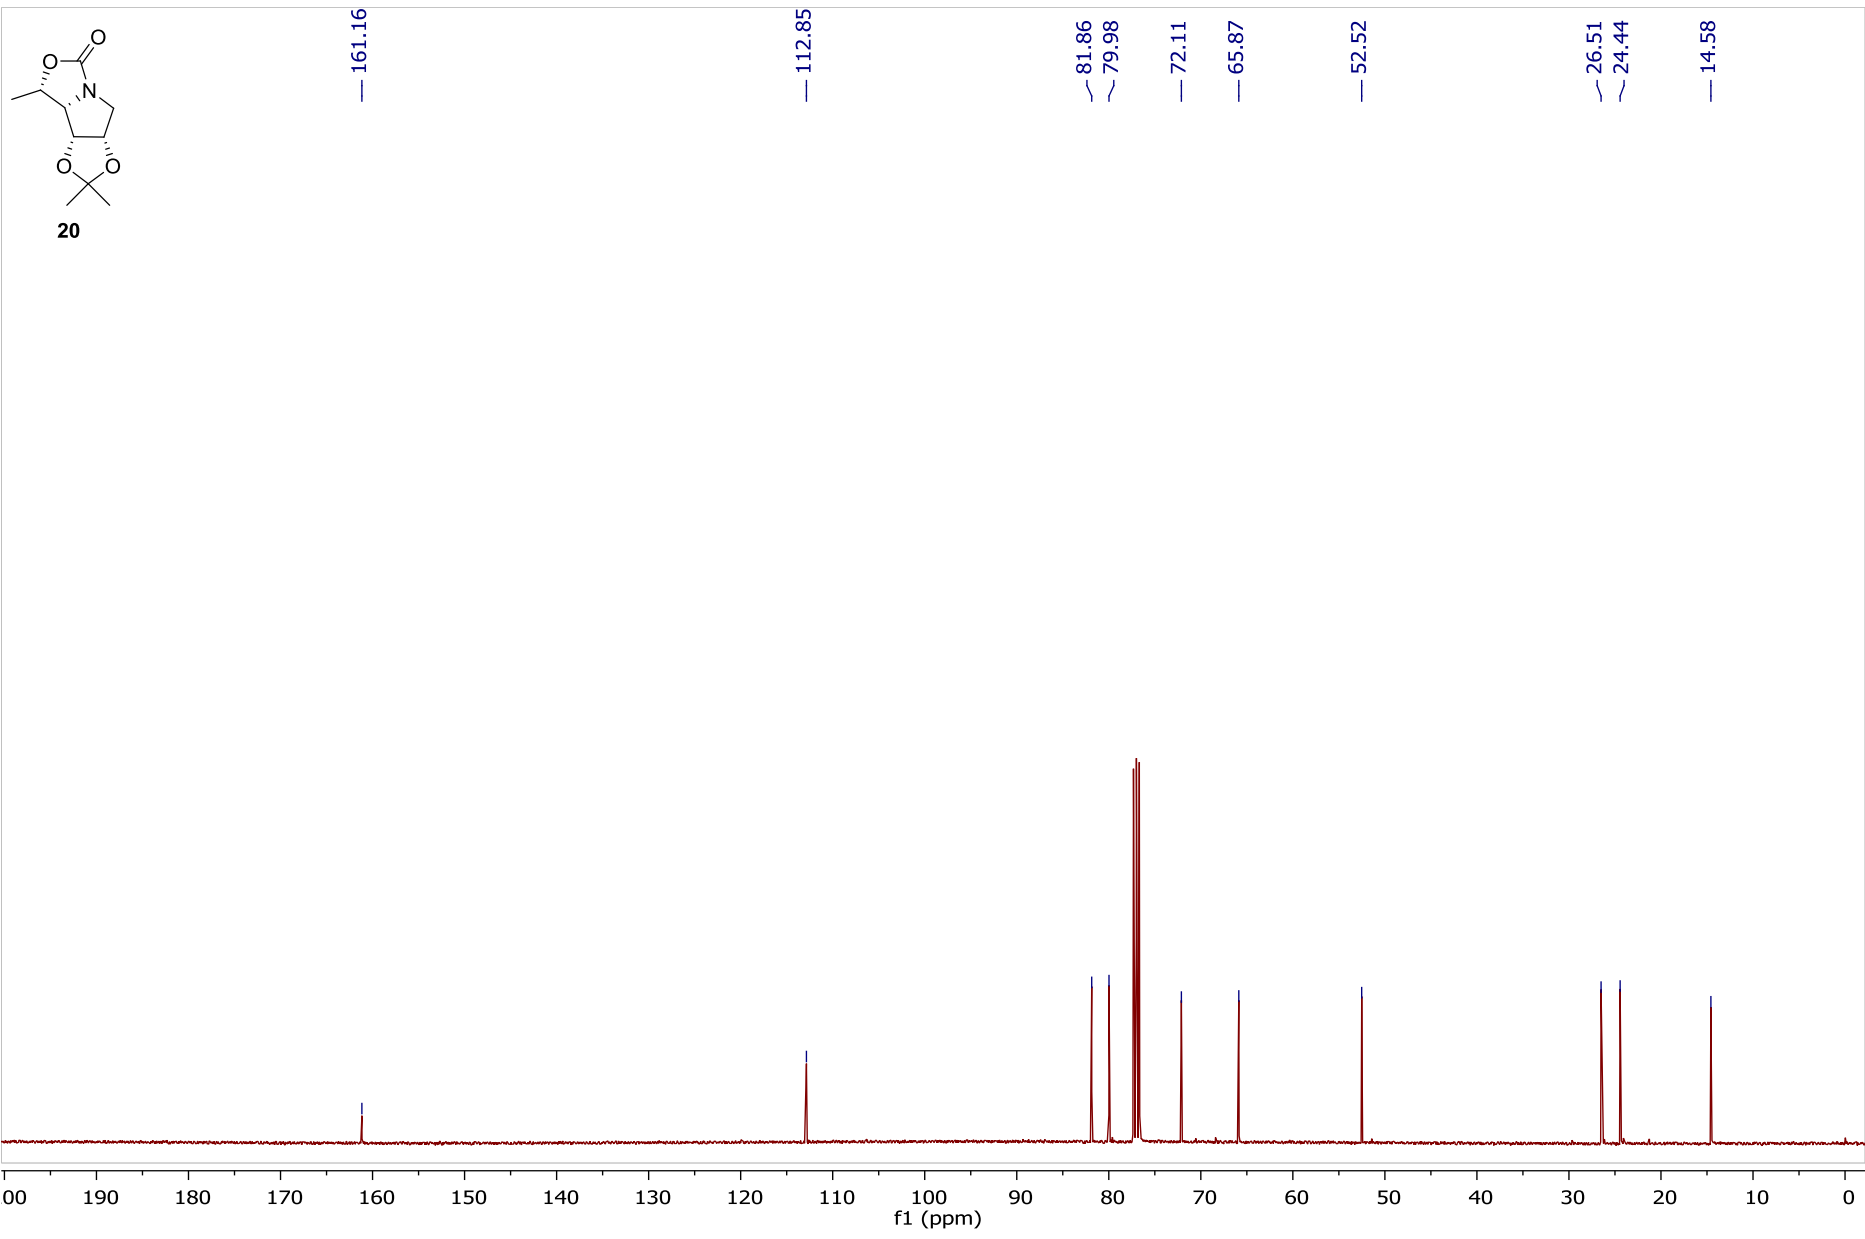

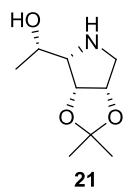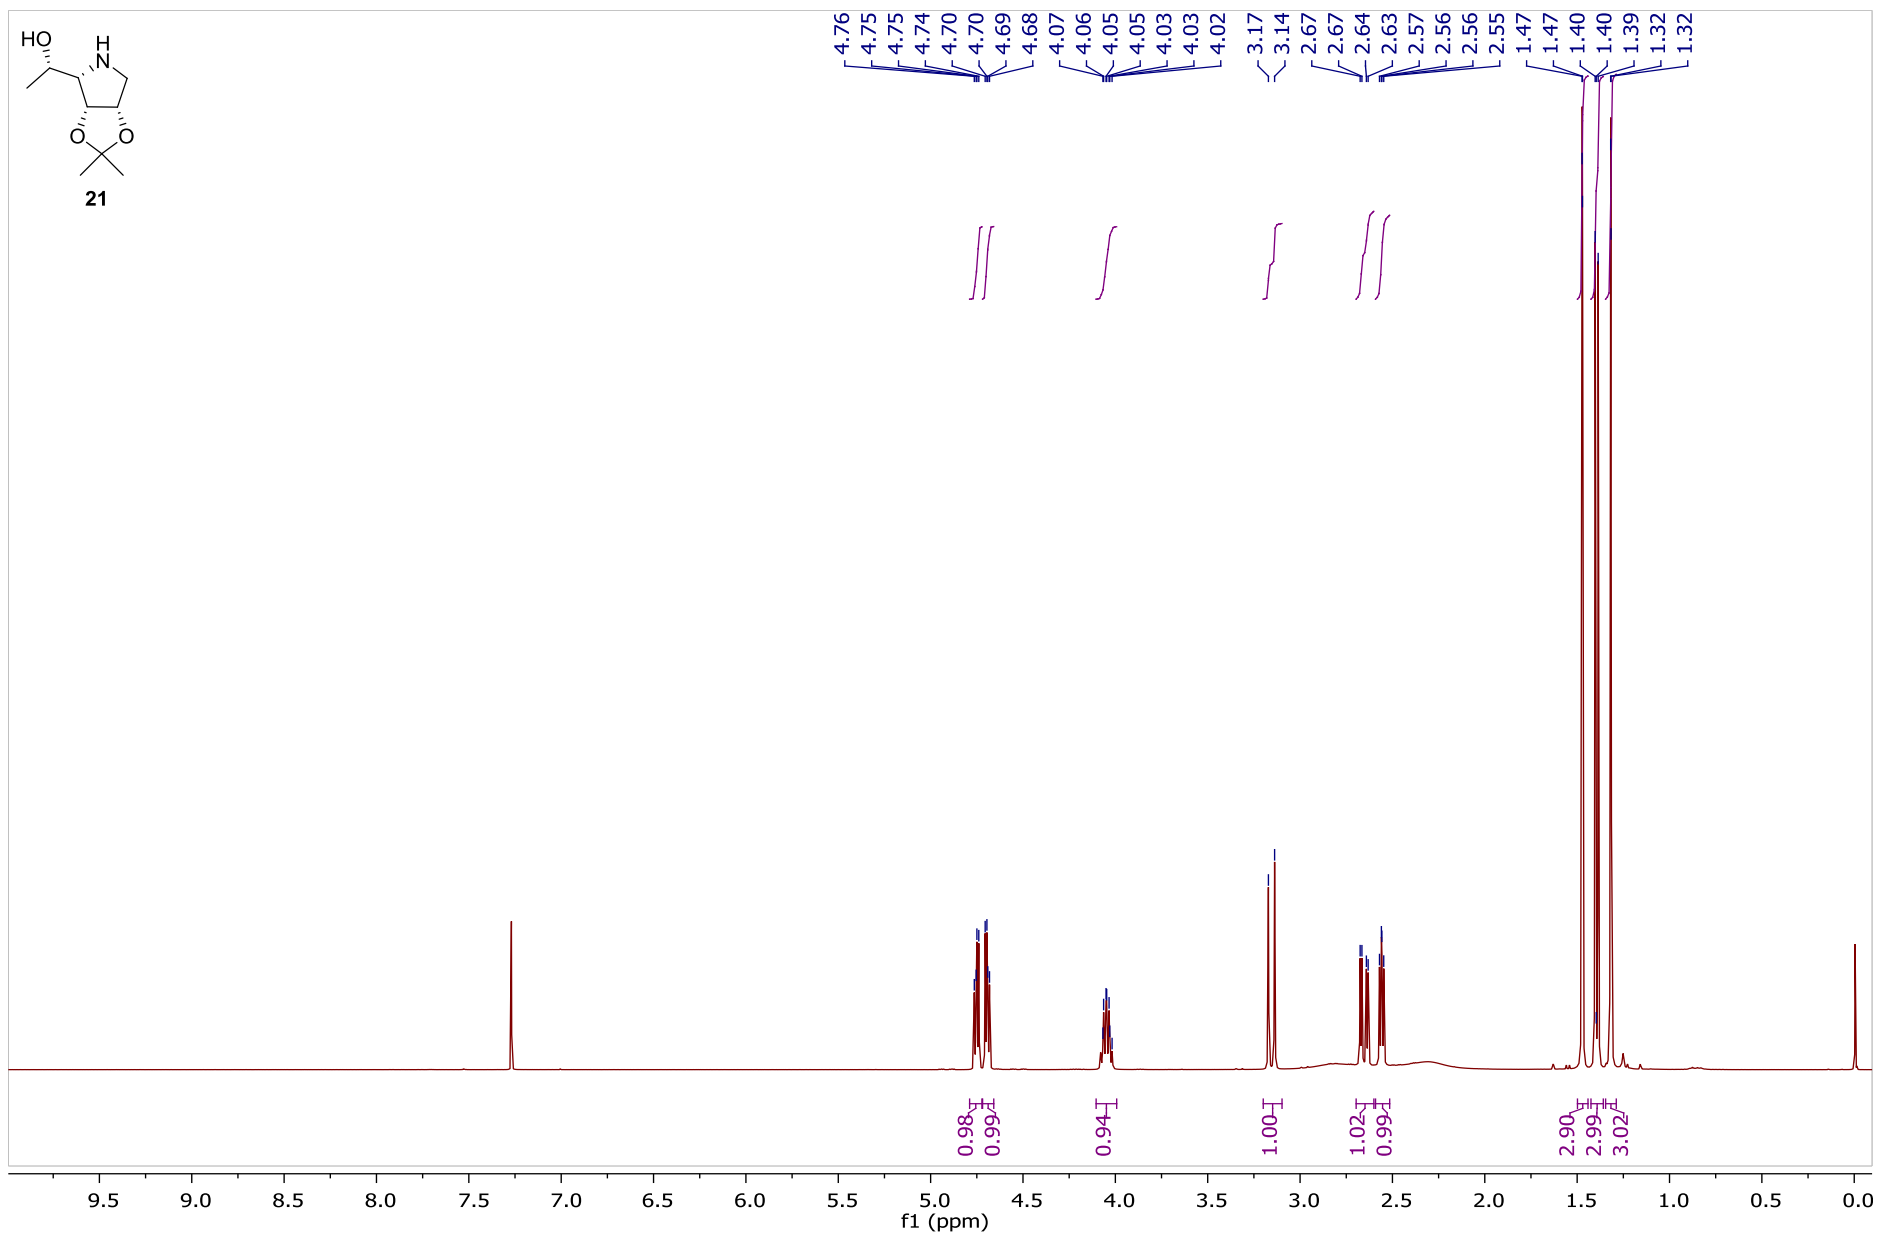

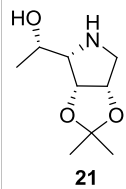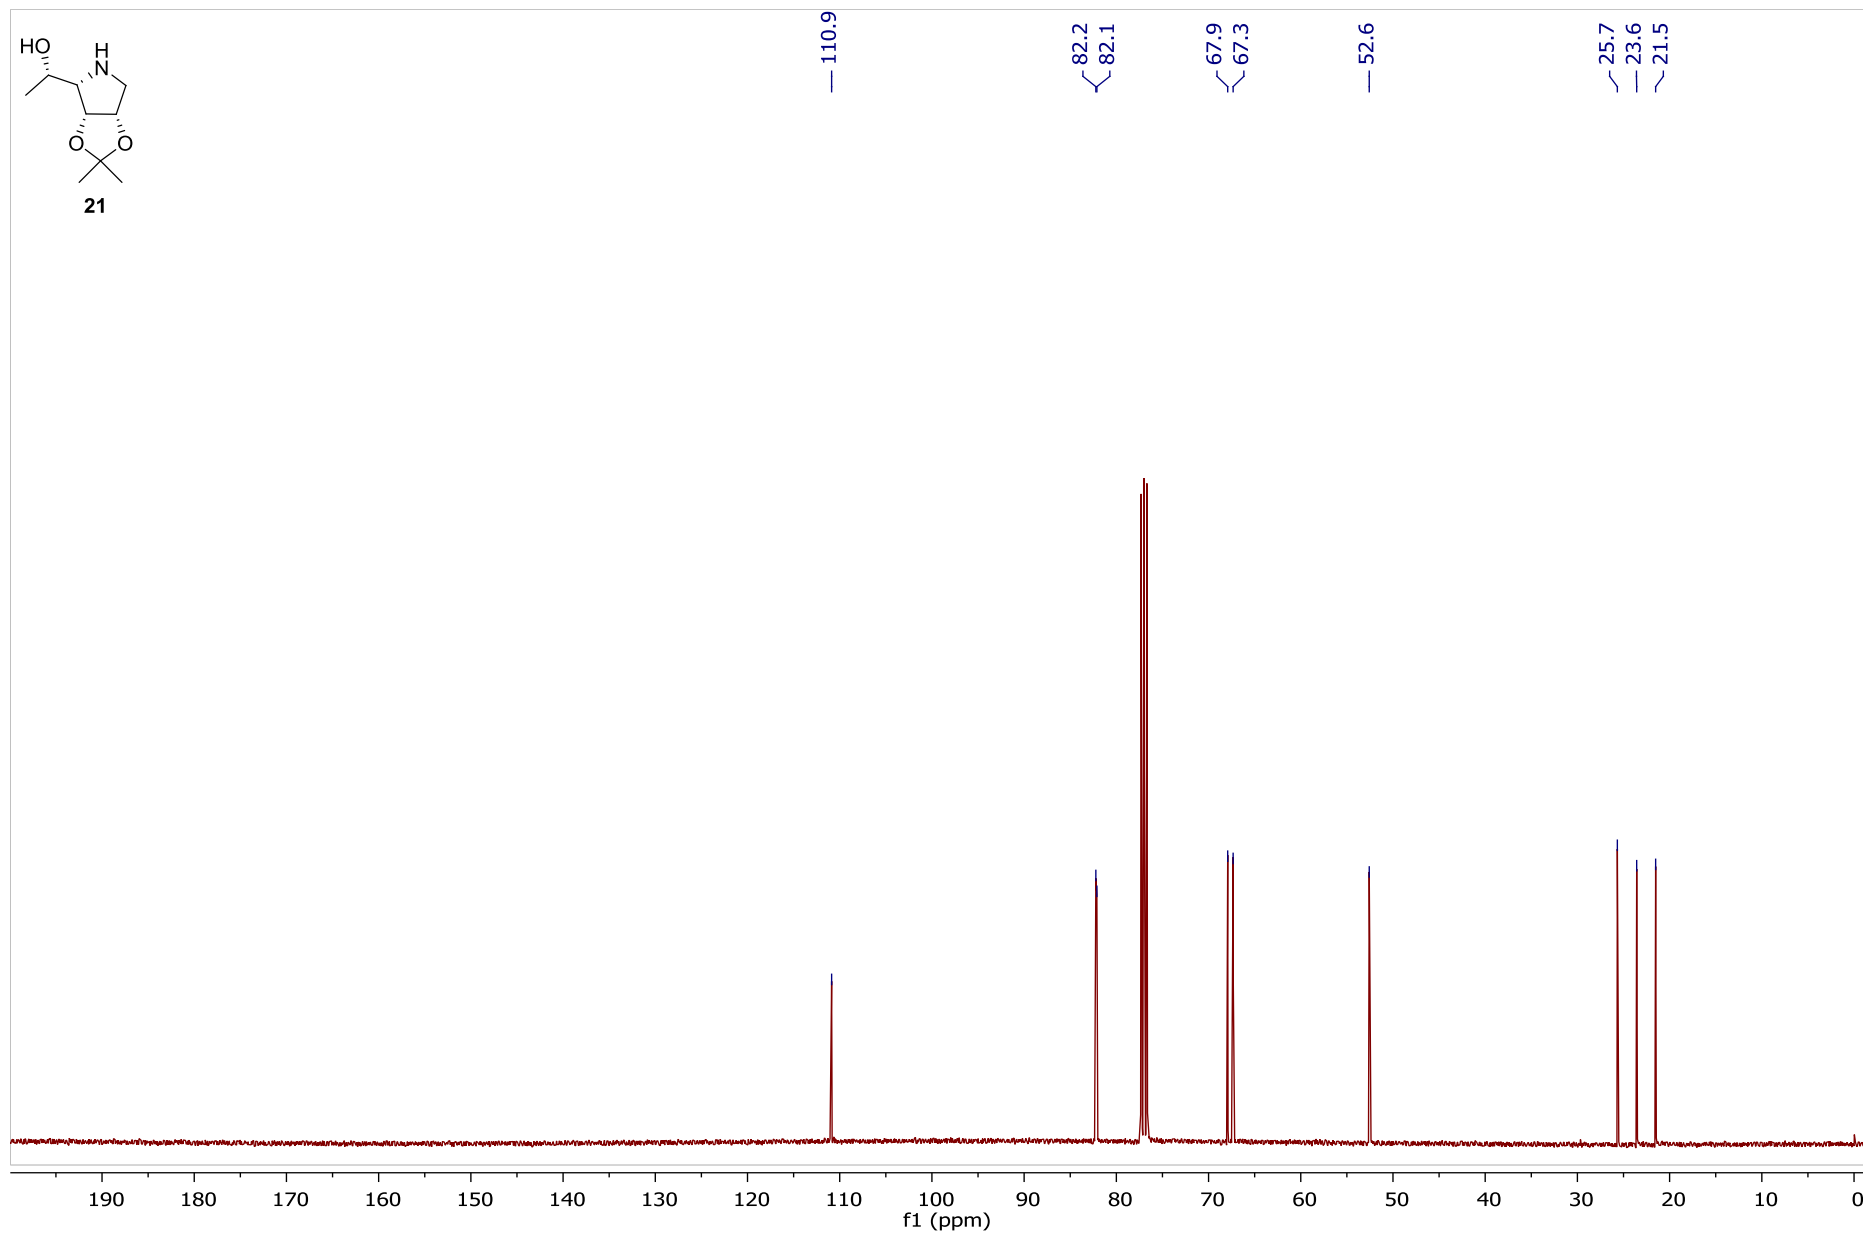

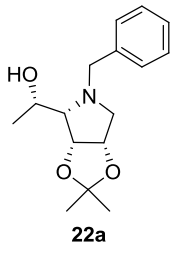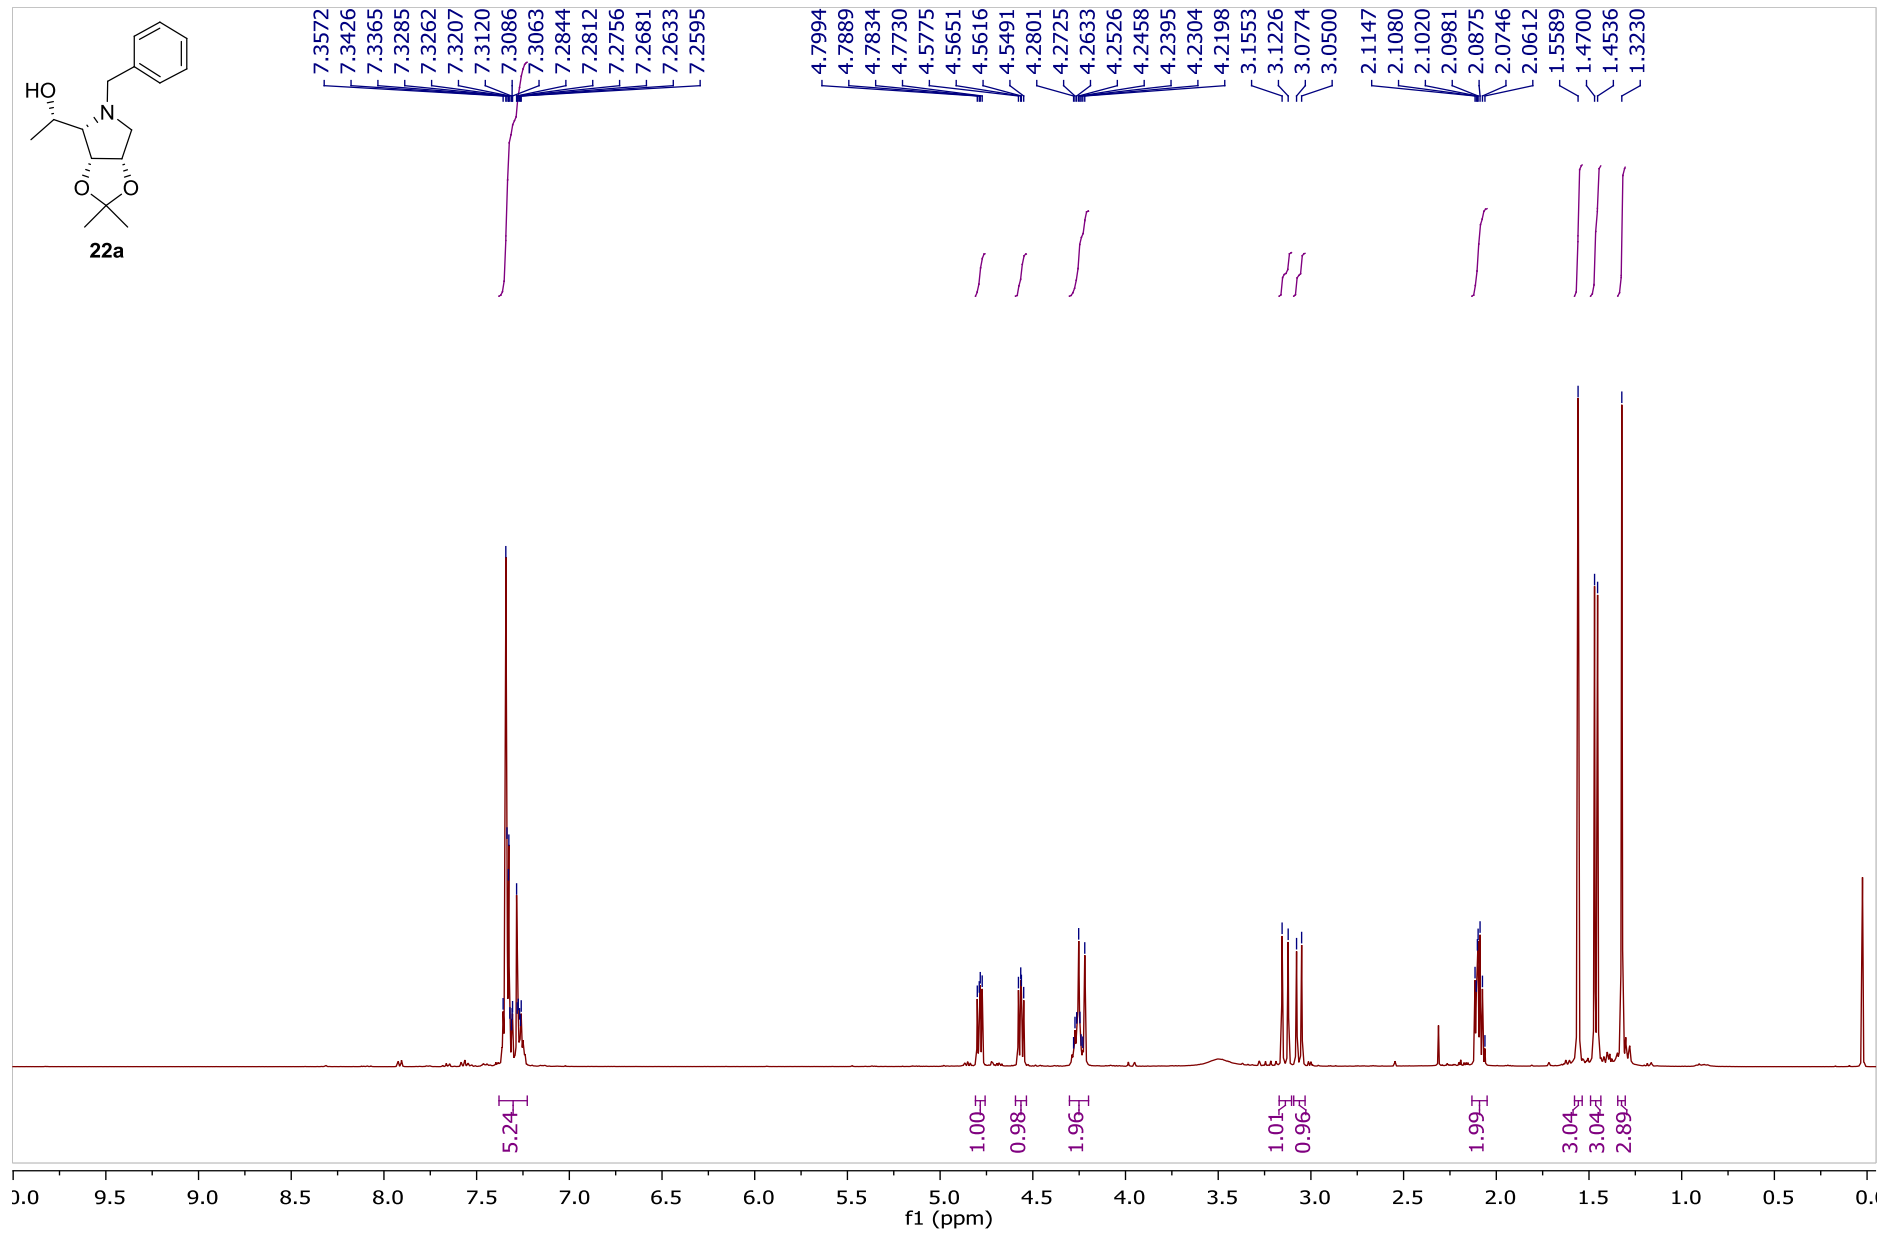



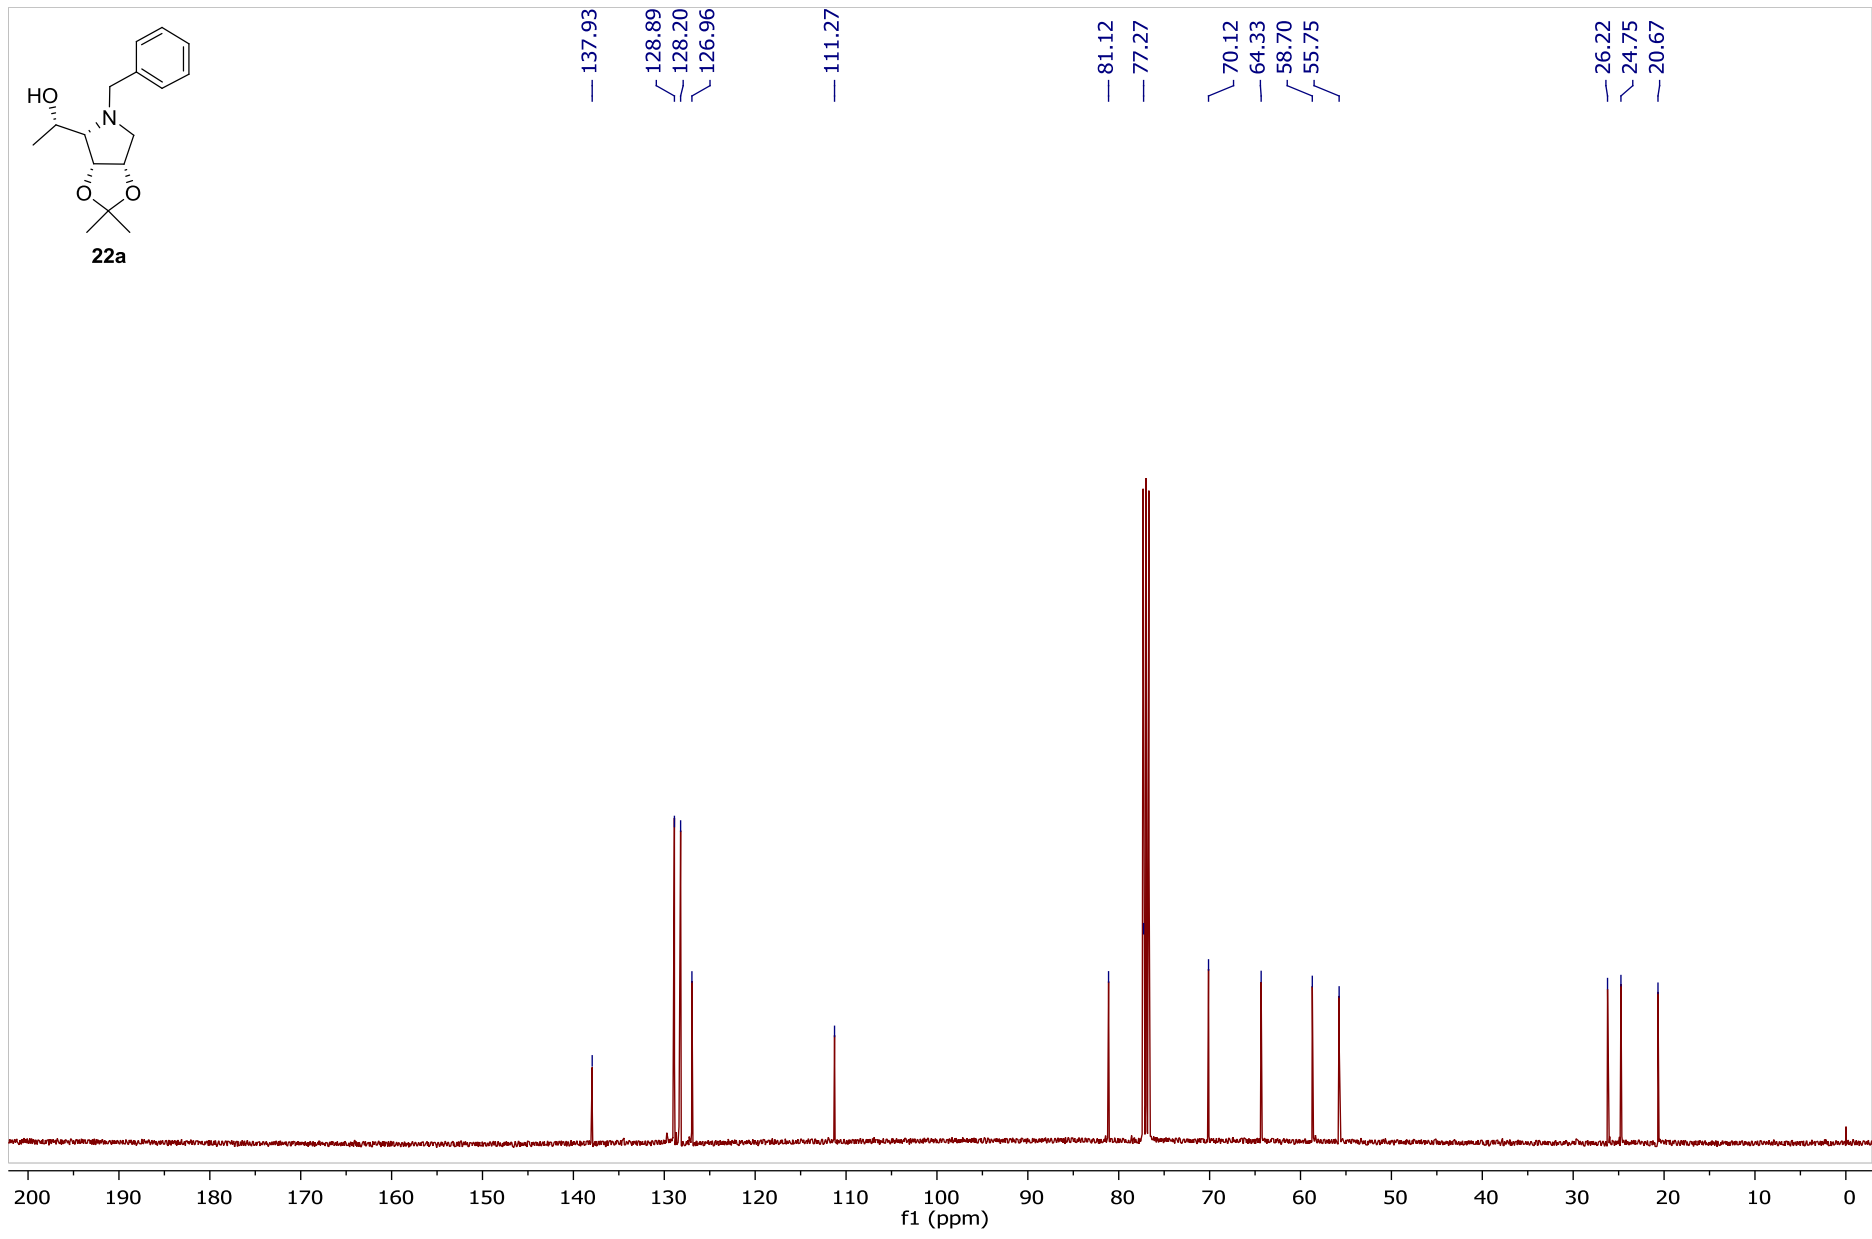

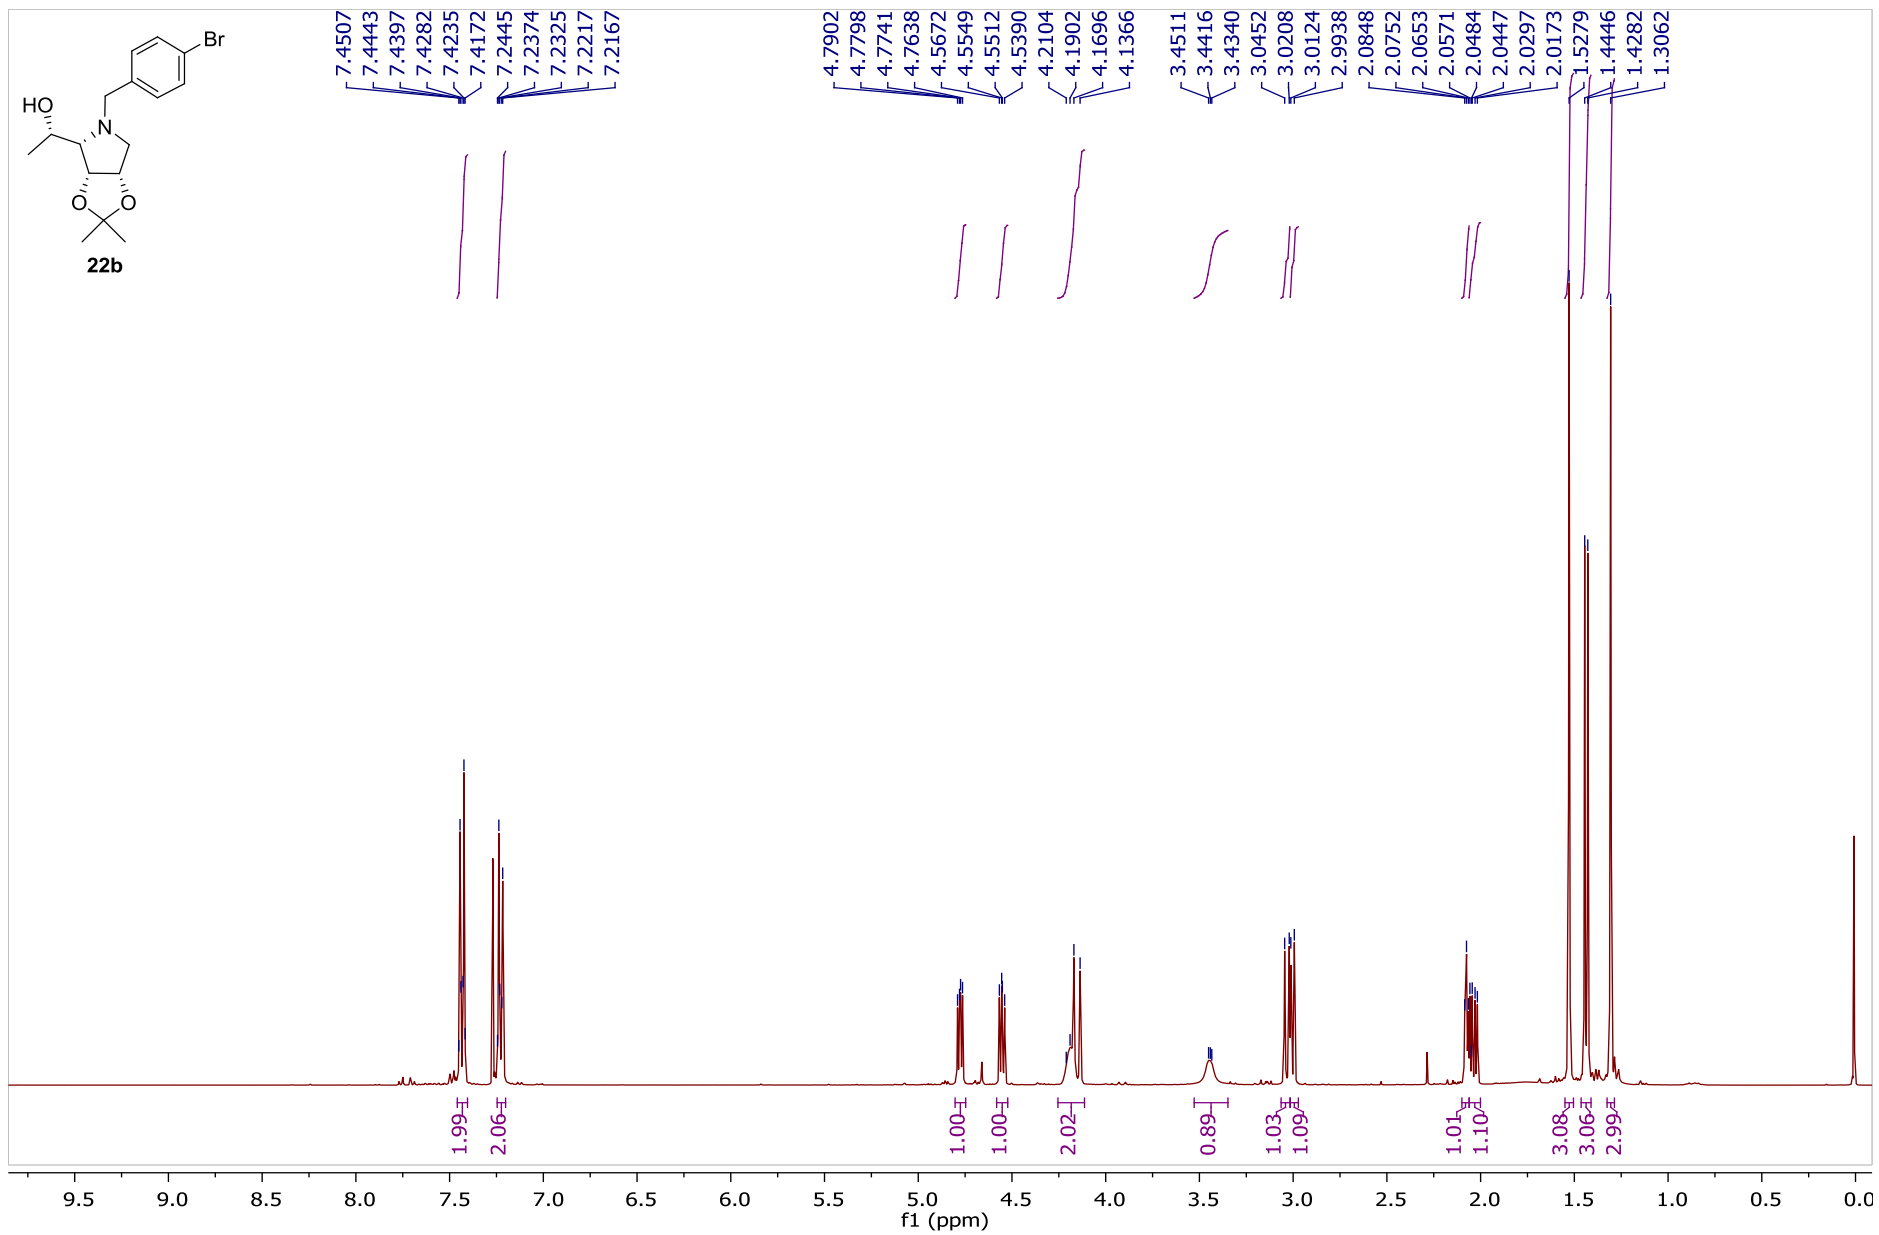

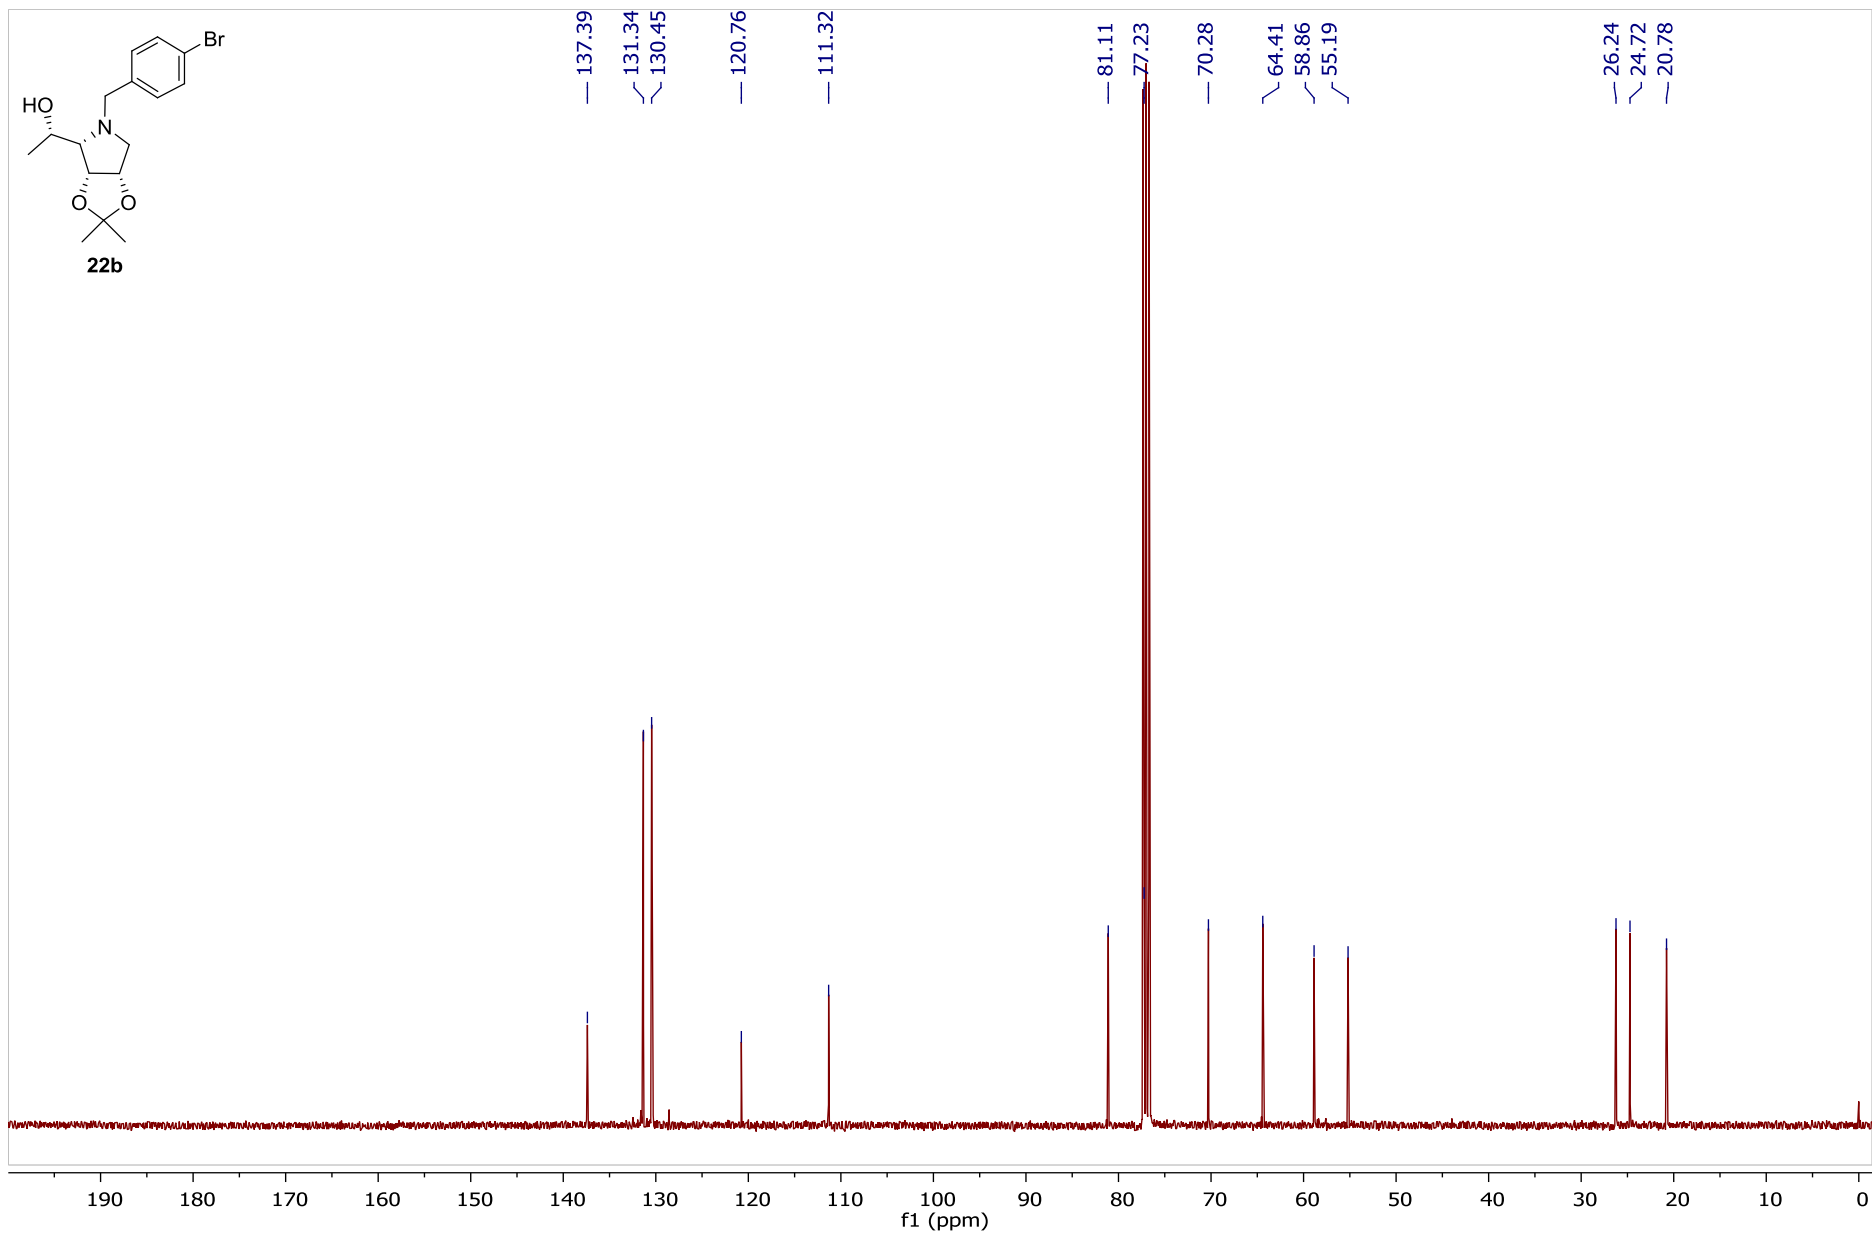

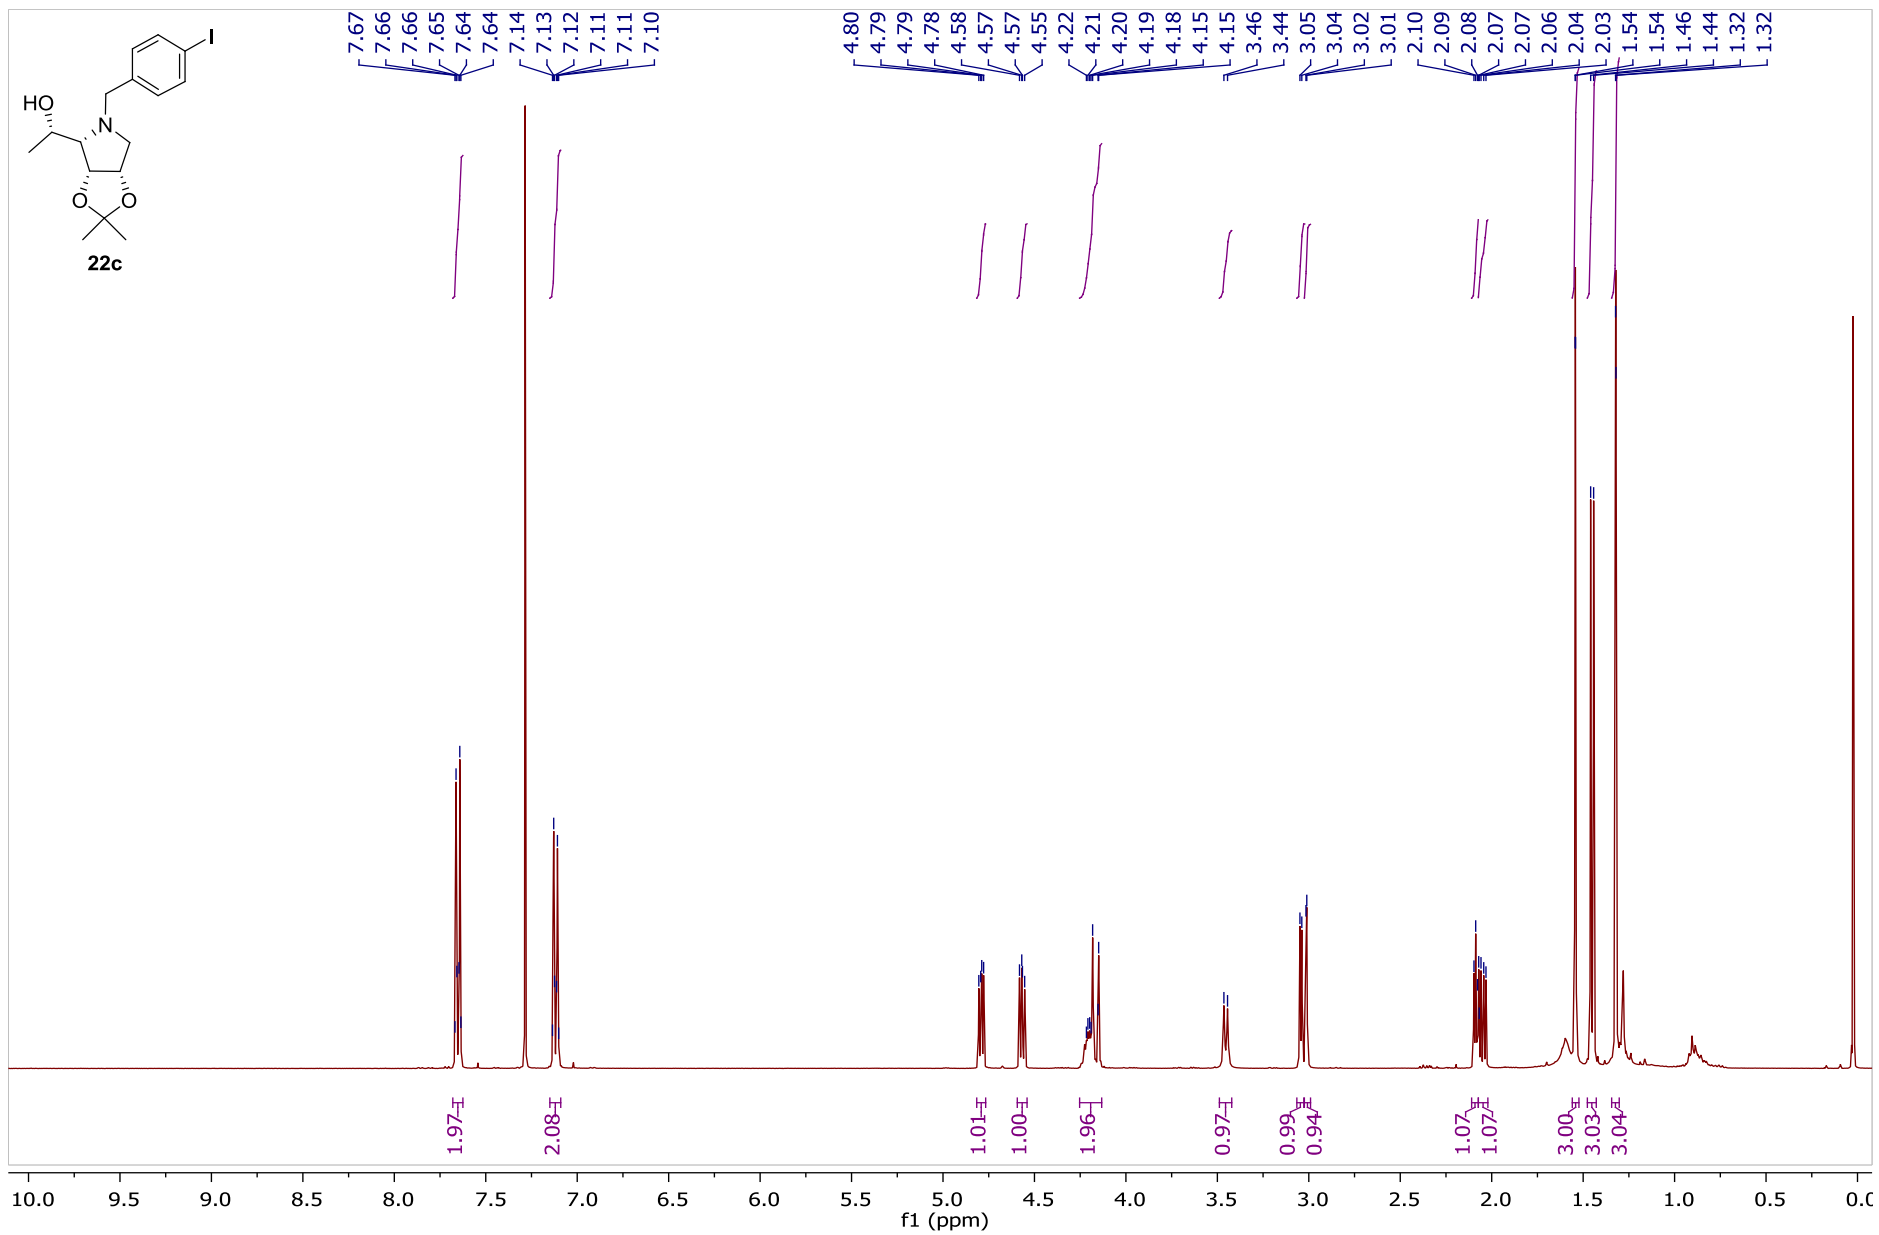

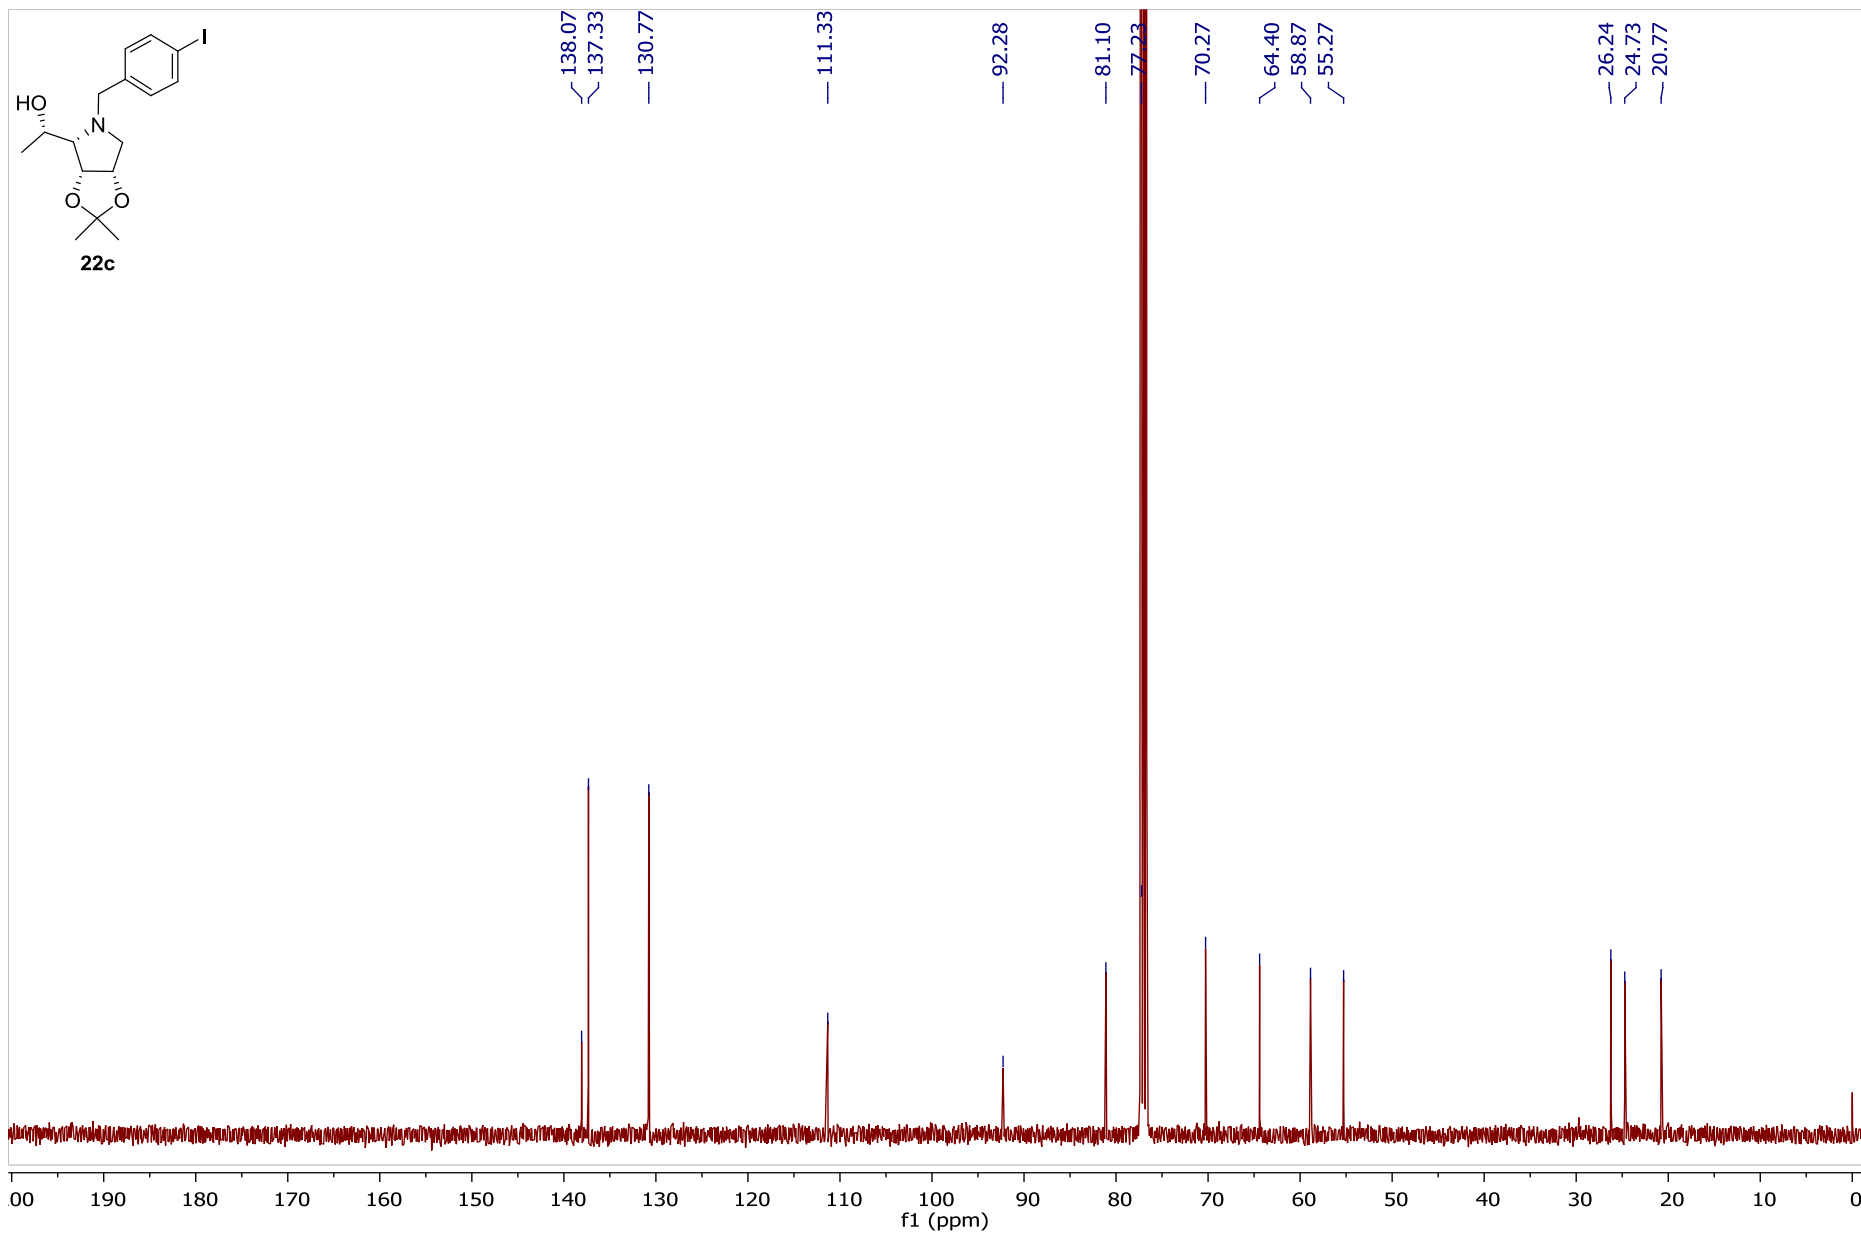

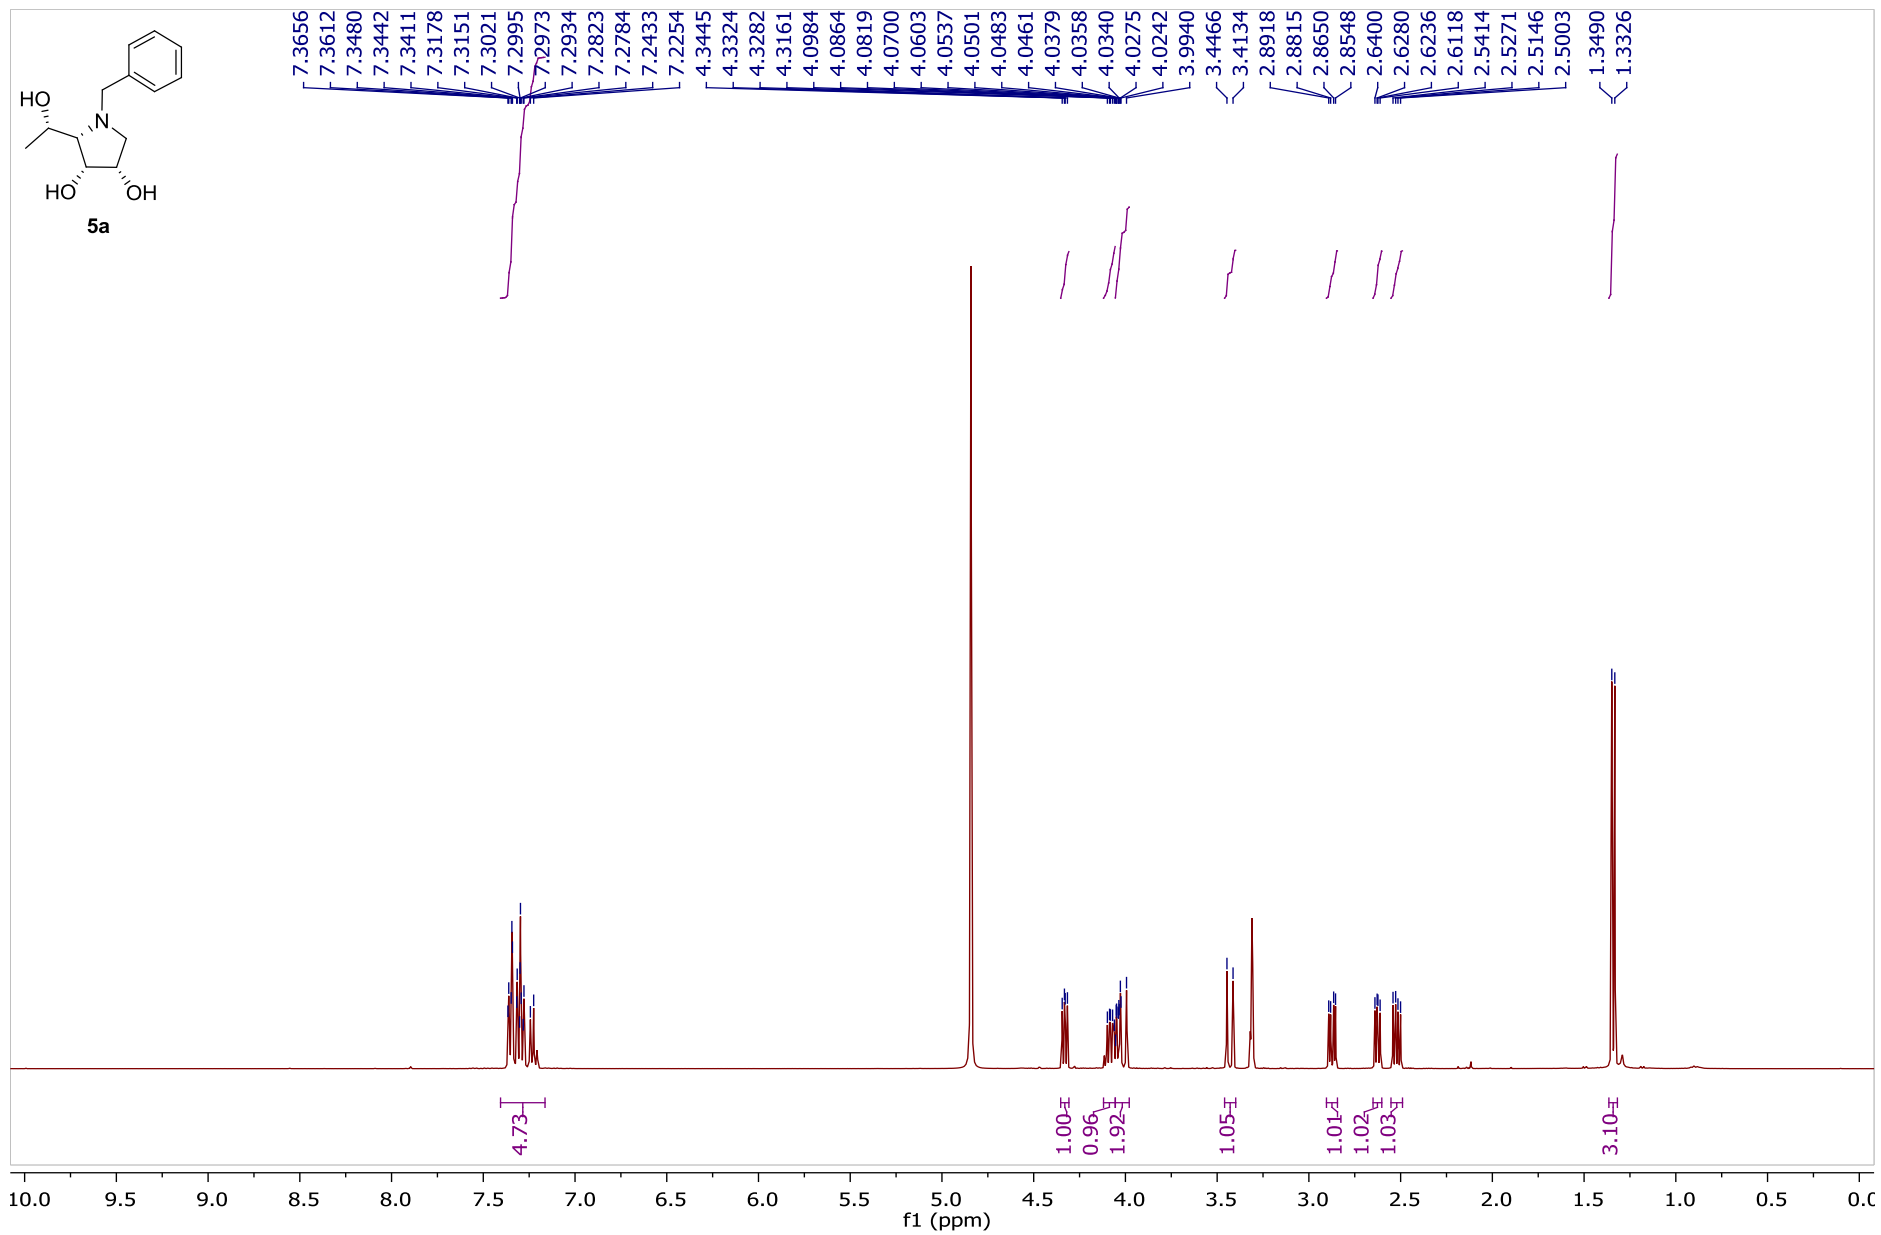

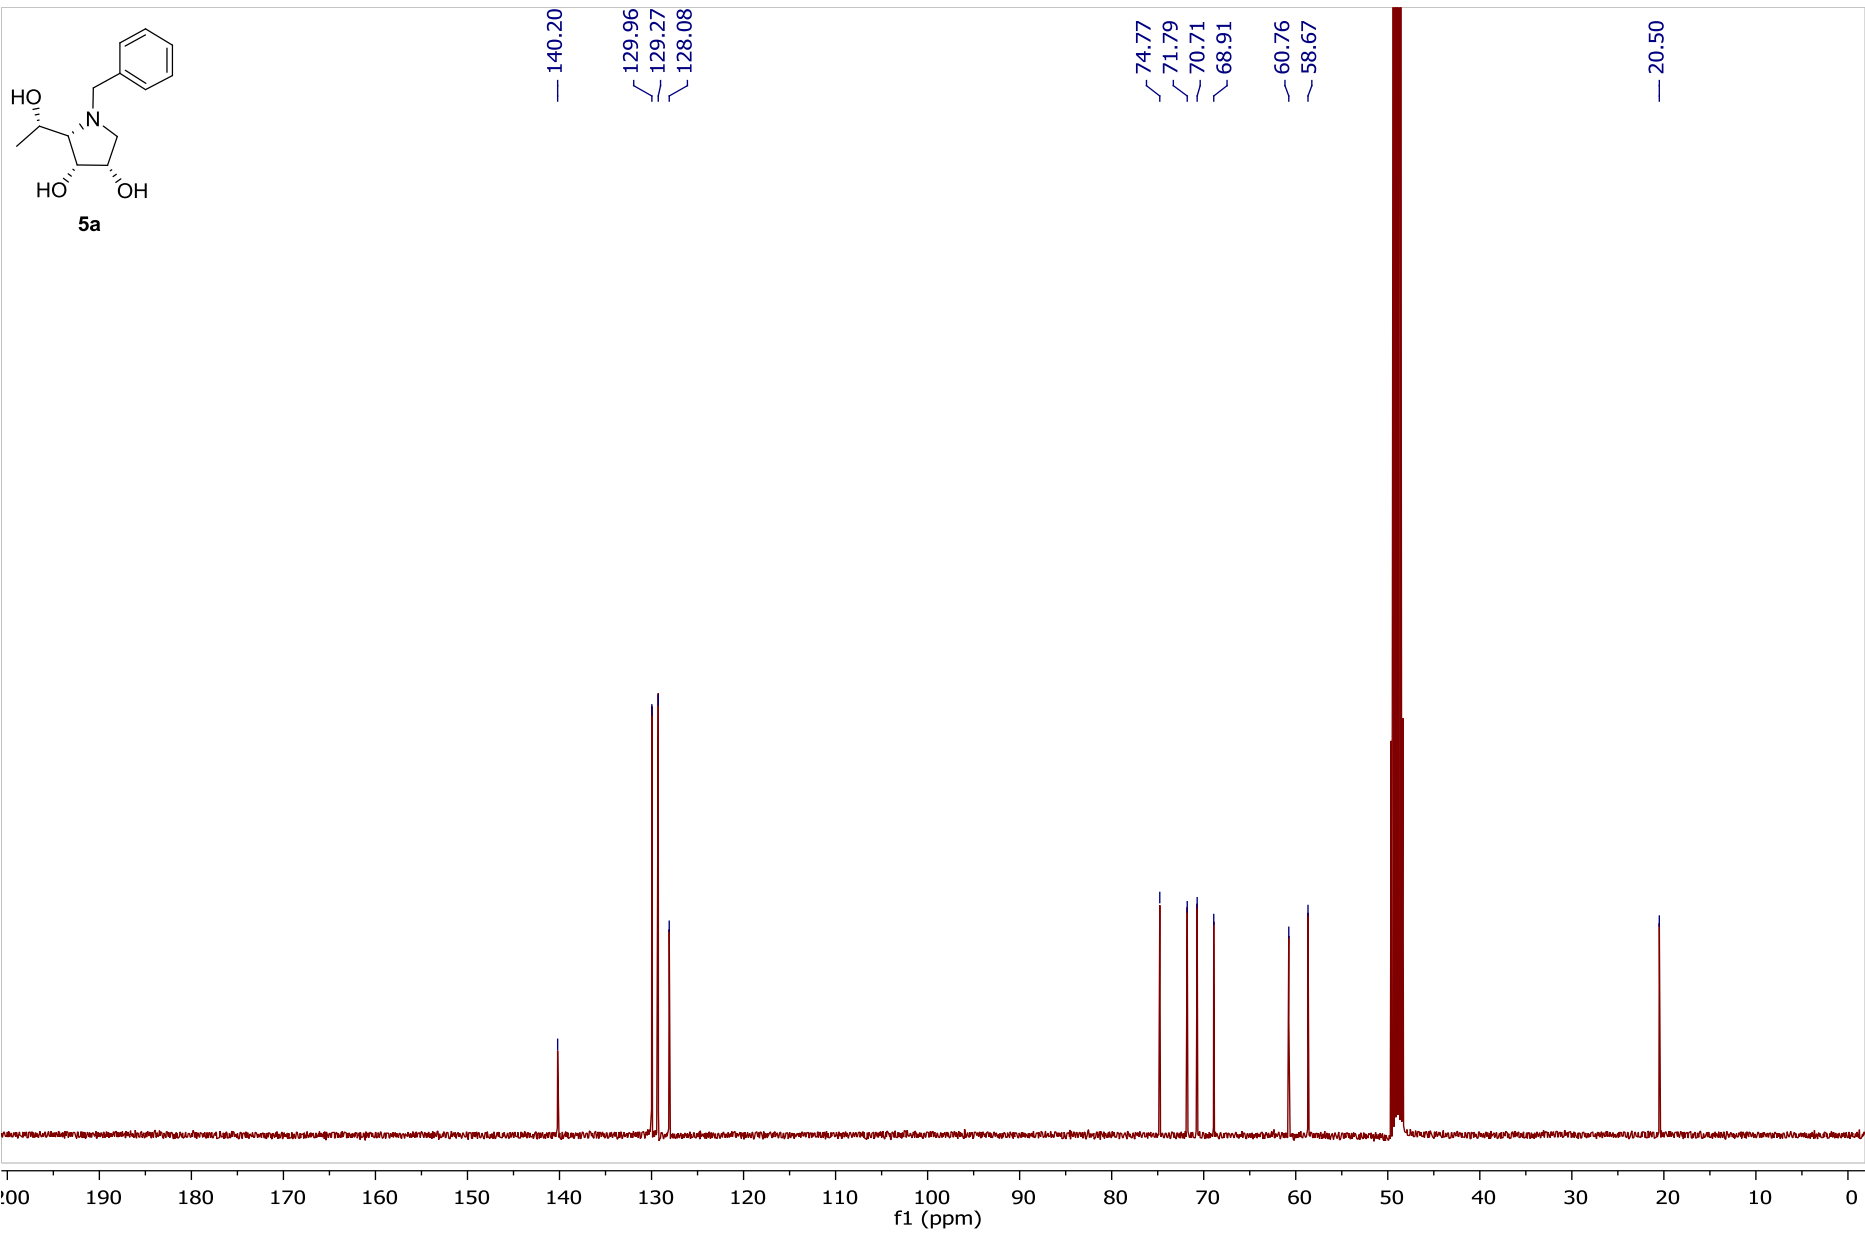

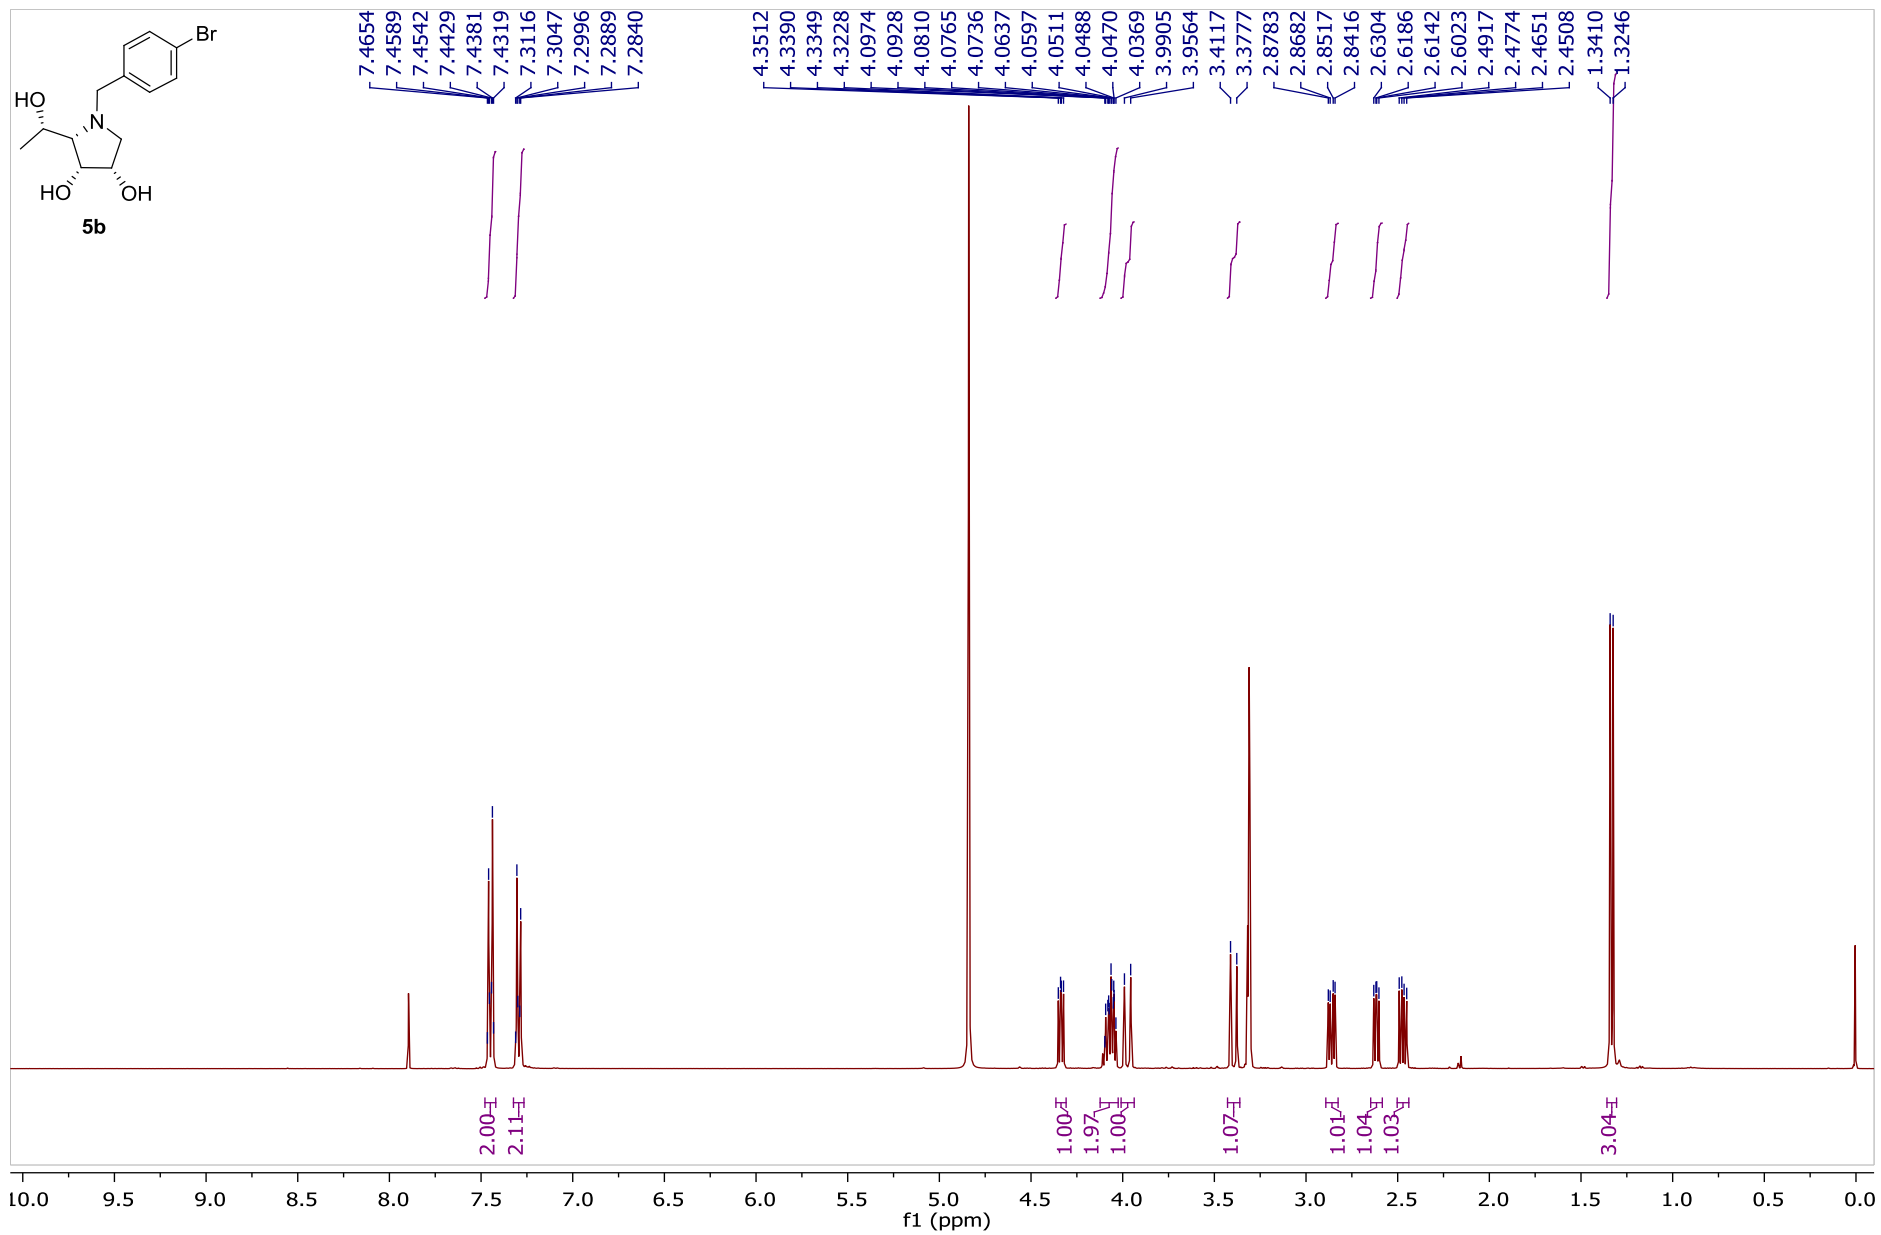



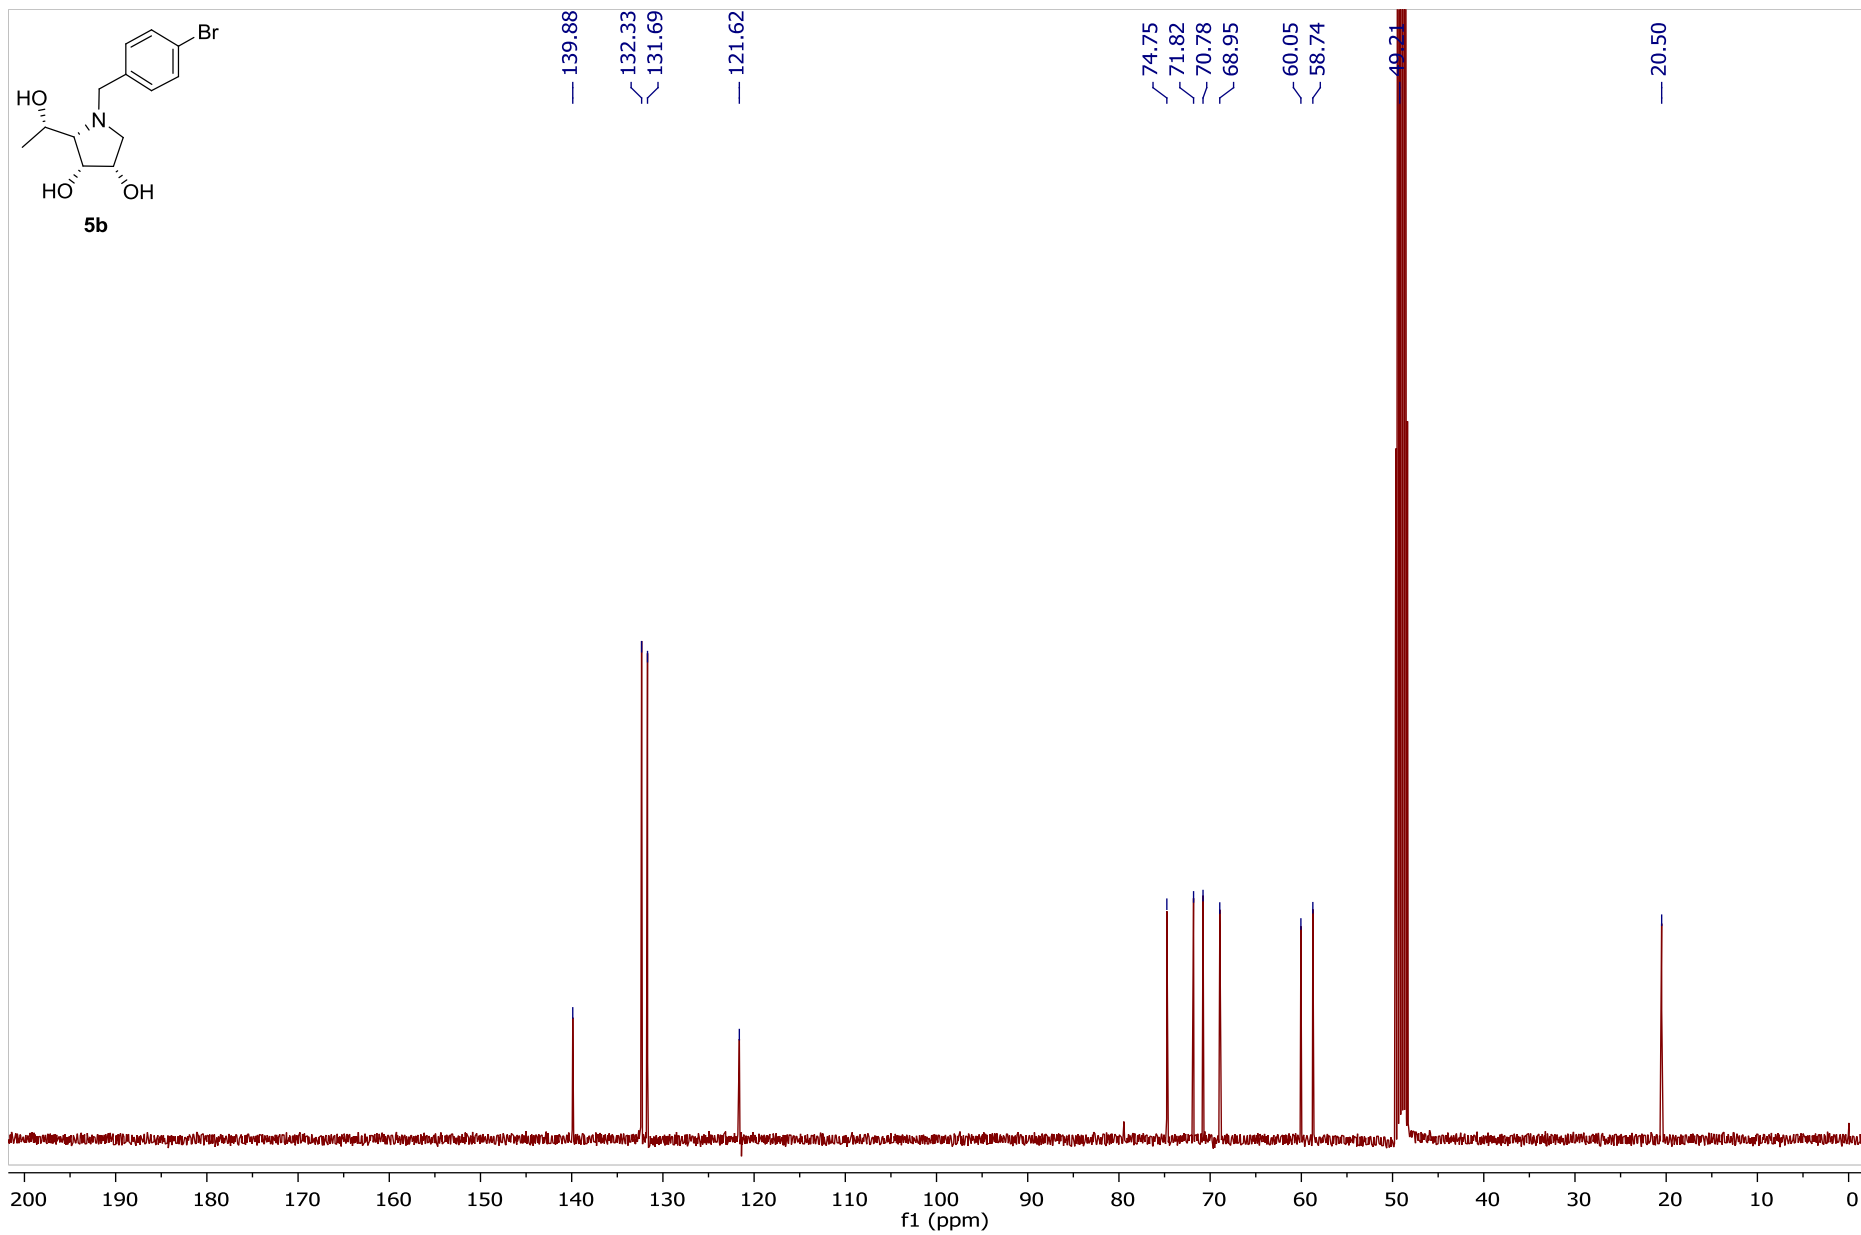

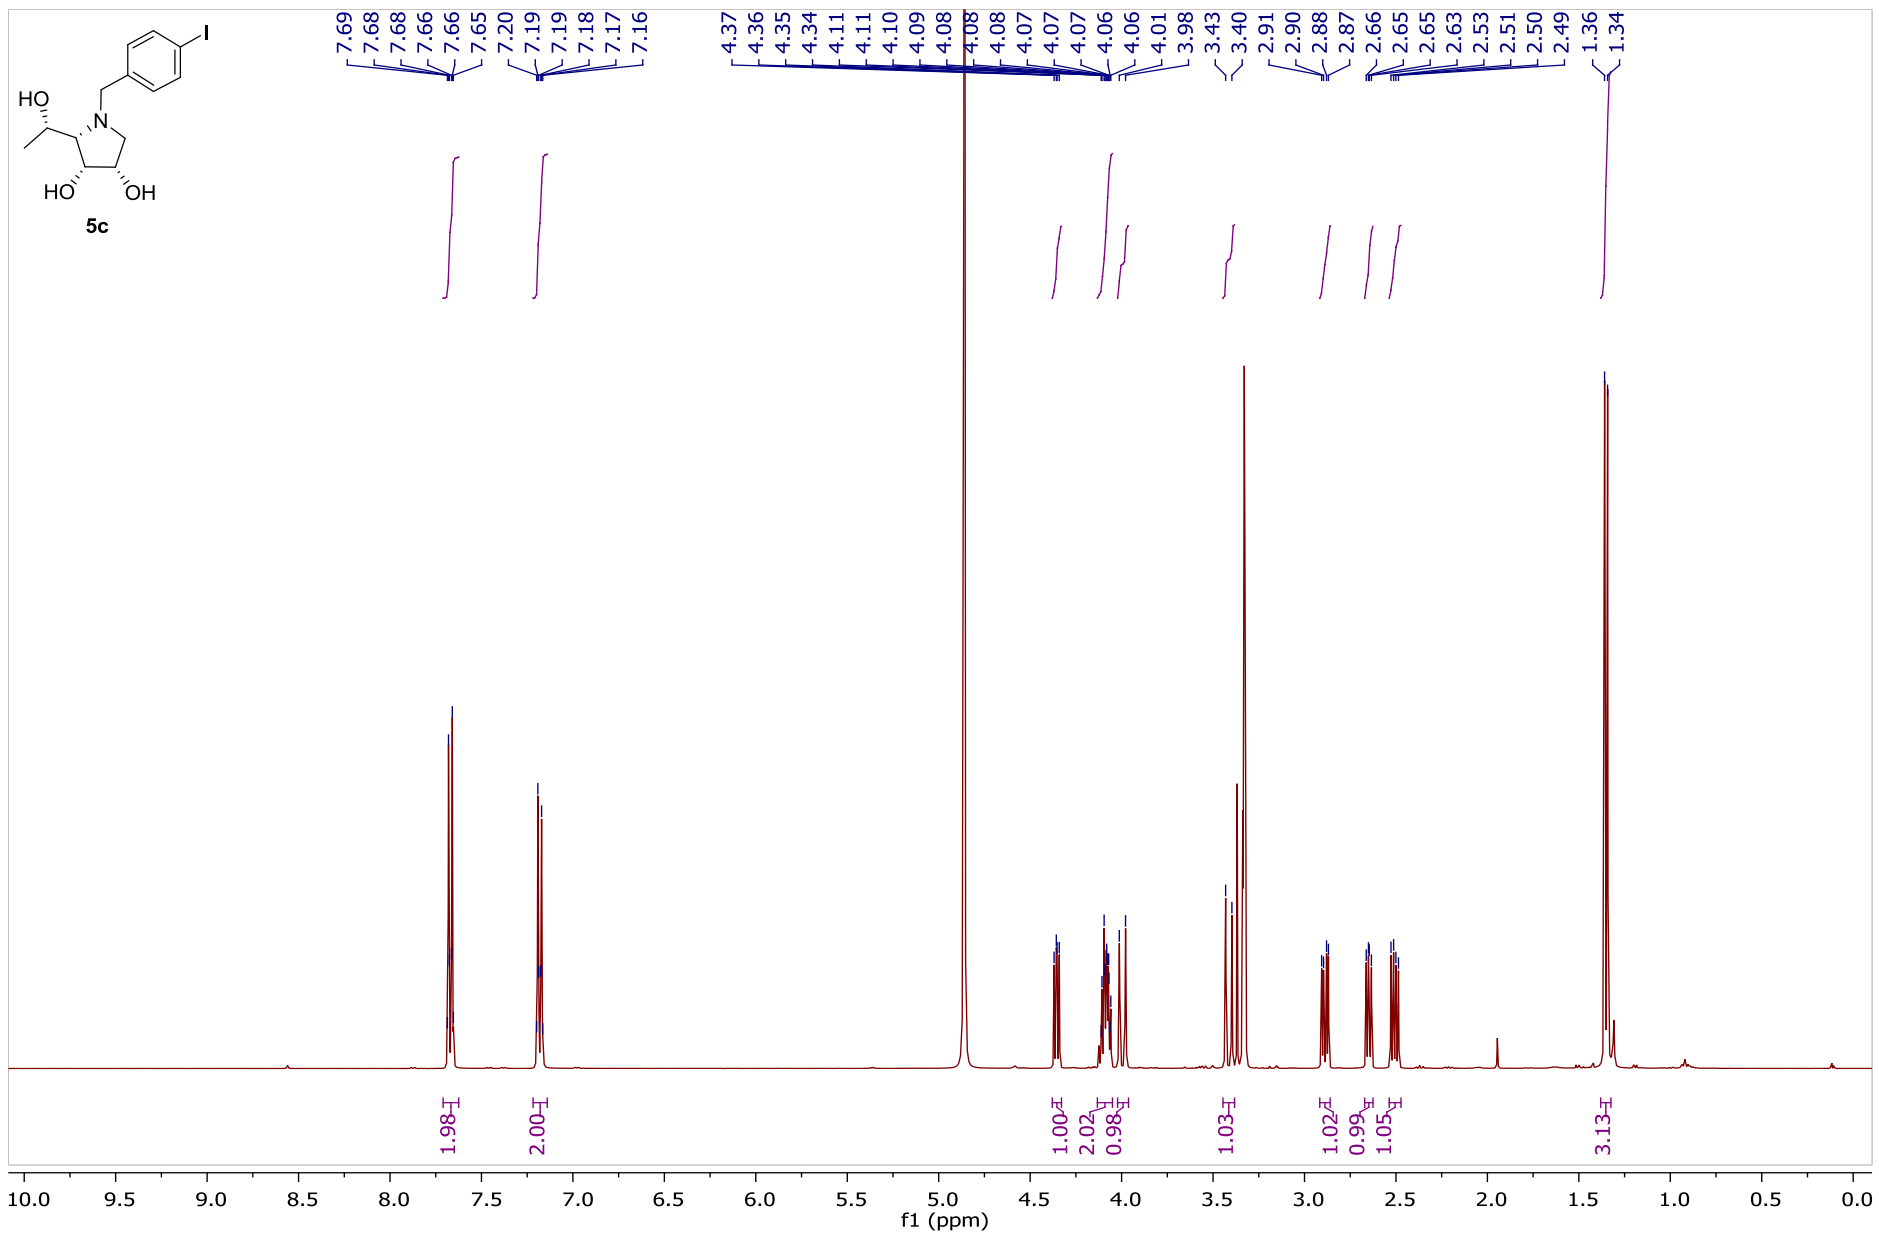

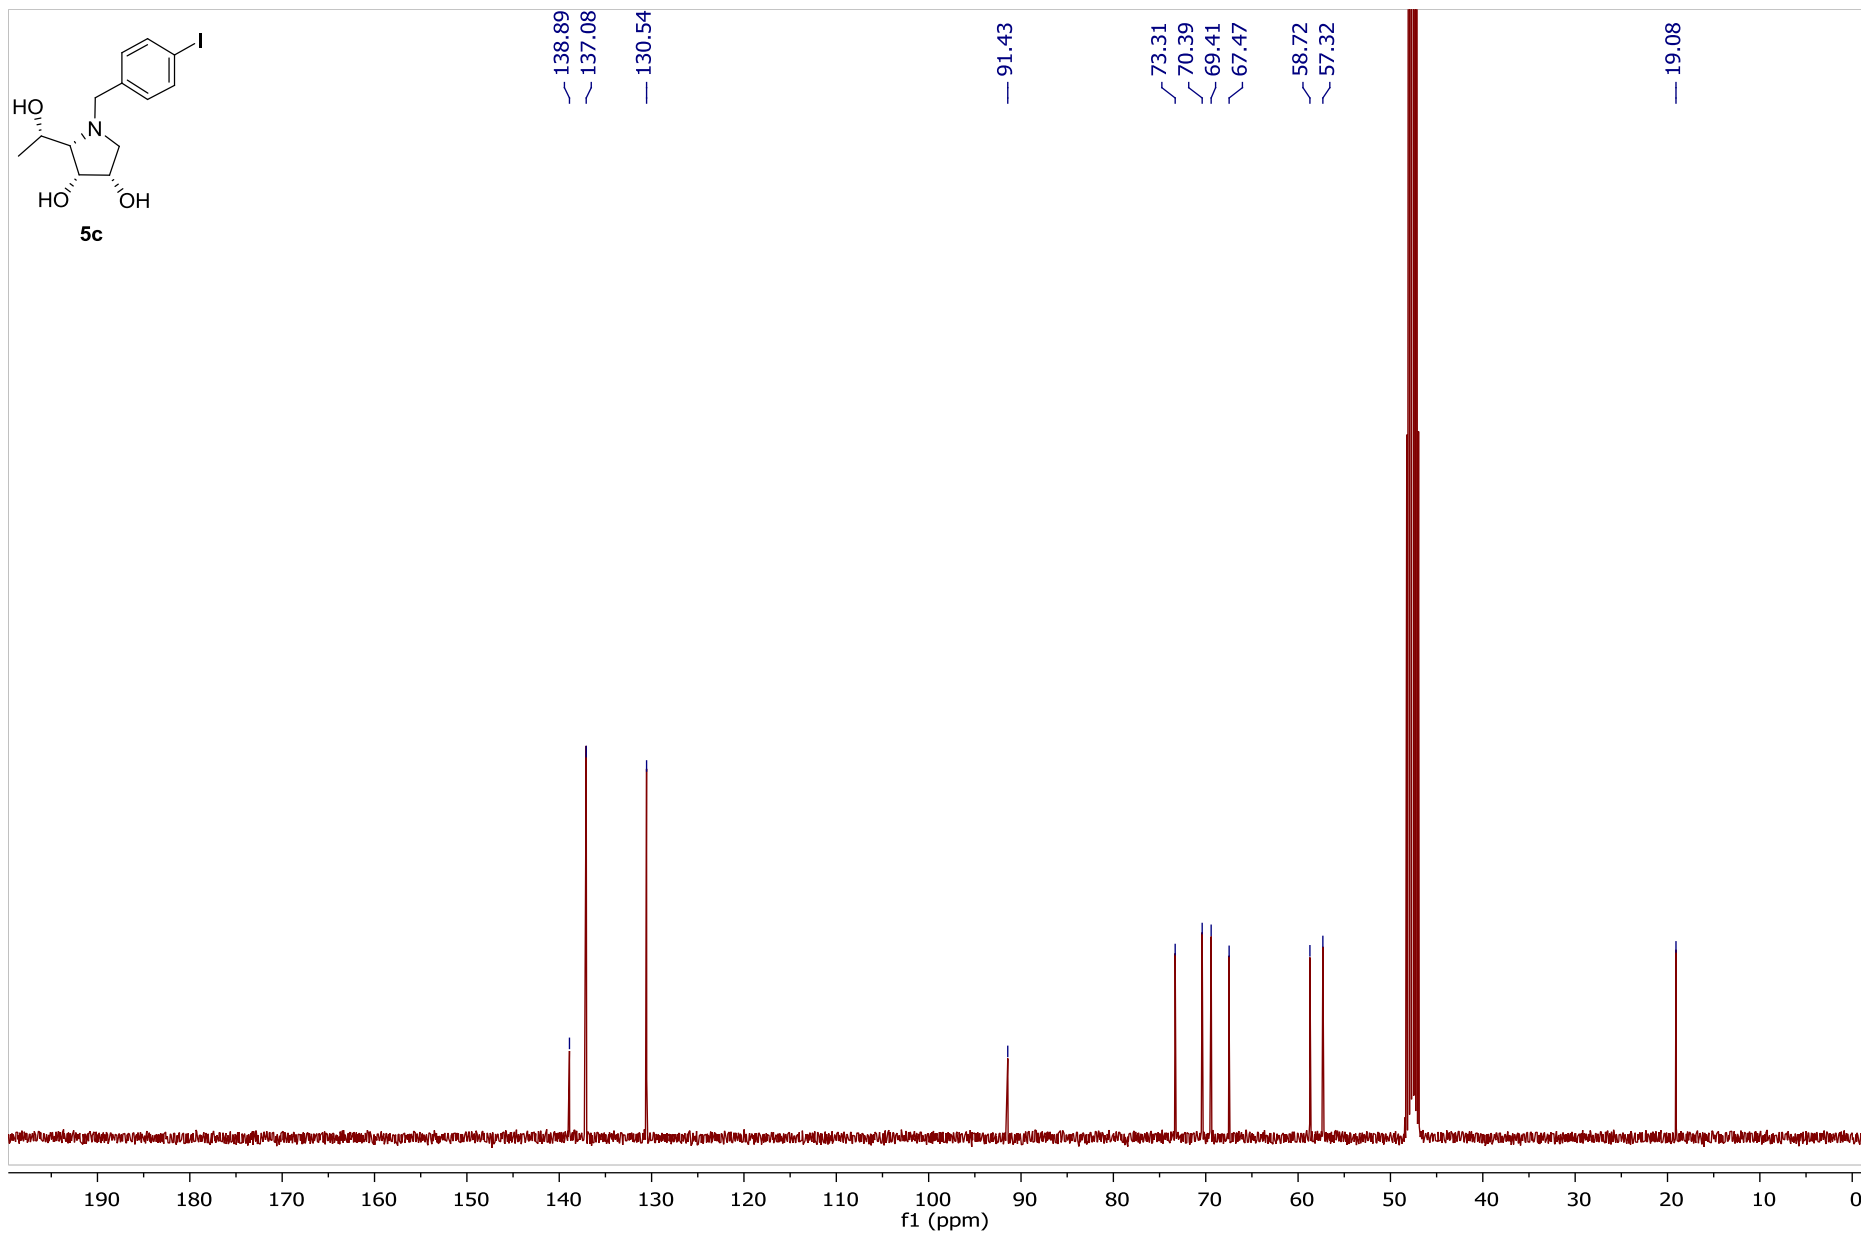

Supplement: Beilstein_J_Org_Chem-14-2156-s002.pdf [file Beilstein_J_Org_Chem-14-2156-s002.pdf]
